# Supplementary material
Source: publisher figshare collection journal article supplement (https://acs.figshare.com/ndownloader/files/3749248)
Supplement: Supplementary file 1 [file 3749248]

## Sheet: Lipidomics
Sample	Sample	DMSO1	DMSO2	DMSO3	Imatinib1	Imatinib2	Imatinib3	Bortezomib1	Bortezomib2	Bortezomib3
Label	Class	H929 DMSO	H929 DMSO	H929 DMSO	H929 Imatinib	H929 Imatinib	H929 Imatinib	H929 Bortezomib	H929 Bortezomib	H929 Bortezomib
CL(14:0/16:0/16:0/16:1)nH	CL	3.66028e+06	1.53253e+06	2.32923e+06	1.24658e+06	1.60981e+06	1.13012e+06	169453	107151	1518.78
CL(14:0/14:0/16:1/18:1)nH	CL	5.8583e+06	6.74669e+06	6.89216e+06	3.6705e+06	7.443e+06	3.39224e+06	1.76006e+06	987085	410204
CL(14:0/16:1/16:1/16:1)nH	CL	6.41482e+06	9.17745e+06	4.8052e+06	8.10819e+06	3.73974e+06	3.86263e+06	2.81756e+06	2.43057e+06	2.88786e+06
CL(14:0/16:0/16:0/18:1)nH	CL	549093	1.52121e+06	943659	878023	1.53615e+06	227013	66025.7	346314	217352
CL(14:0/16:0/16:1/18:1)nH	CL	1.99789e+07	2.24388e+07	2.33305e+07	2.09214e+07	1.16448e+07	2.70272e+07	6.81673e+06	1.35505e+07	2.06626e+07
CL(14:0/16:1/16:1/18:1)nH	CL	5.12053e+07	5.61489e+07	4.76822e+07	4.44752e+07	3.63345e+07	5.55341e+06	2.10804e+07	1.81642e+07	1.49207e+07
CL(16:1/16:1/16:1/16:1)nH	CL	2.39216e+07	1.80837e+07	2.55523e+07	2.72556e+07	2.092e+07	1.54688e+07	11207315	1.49432e+07	1.13285e+07
CL(15:0/16:0/18:1/16:1)nH	CL	1.11844e+06	962456	1.77935e+06	310106	2.11095e+06	710083	528183	665367	930421
CL(17:1/14:0/16:1/18:1)nH	CL	4.63297e+06	5.32749e+06	3.9639e+06	3.35881e+06	3.37003e+06	2.67528e+06	1.86092e+06	2.33455e+06	1.59123e+06
CL(17:1/16:1/16:1/16:1)nH	CL	2.00595e+06	1.58495e+06	2.75441e+06	3.47054e+06	2.11452e+06	14180.5	2.3069e+06	981253	1.30918e+06
CL(14:0/16:0/18:1/18:1)nH	CL	1.11511e+08	1.18002e+08	5.75484e+07	6.57863e+07	6.09173e+07	1.81726e+07	2.43707e+07	4.29412e+07	4.17487e+07
CL(14:0/16:0/18:1/18:1)nH	CL	3.33754e+07	3.19187e+07	2.78809e+07	3.07009e+07	2.08431e+07	3.04307e+07	1.32758e+07	9.10947e+06	7.75082e+06
CL(14:0/16:1/18:1/18:1)nH	CL	9.30179e+07	1.3069e+08	9.98006e+07	9.78906e+07	5.09961e+07	1.16299e+08	5.28999e+07	3.94101e+07	7.47019e+07
CL(18:1/16:0/16:1/16:1)nH	CL	1.07415e+07	3.40399e+06	6.8461e+06	373267	2.39451e+06	2.07552e+06	2.10101e+06	2.55855e+06	3.77285e+06
CL(18:1/16:0/16:1/16:1)nH	CL	3.37337e+06	2.50443e+06	2.24978e+06	244356	7.81799e+06	2.47366e+06	1.58744e+06	660059	1.04931e+06
CL(16:1/16:1/16:1/18:1)nH	CL	1.35425e+08	2.02431e+08	1.45892e+08	1.57934e+08	1.4773e+08	1.12235e+08	9.10169e+07	7.57541e+07	7.85801e+07
CL(18:2/16:1/16:1/16:1)nH	CL	2.02108e+07	3.82261e+07	4.10803e+07	3.9221e+07	2.92947e+07	1.79558e+07	2.00124e+07	1.49341e+07	1.30033e+07
CL(15:0/16:0/18:1/18:1)nH	CL	1.76303e+06	2.58921e+06	597584	2.0156e+06	801986	2.1528e+06	5.25546e+06	1.299e+06	919947
CL(18:2/15:0/16:0/18:1)nH	CL	1.07451e+07	1.0029e+07	9.77097e+06	1.01382e+07	8.51898e+06	4.0582e+06	6.19353e+06	6.01625e+06	5.30308e+06
CL(17:1/16:0/16:1/18:1)nH	CL	2.23364e+06	1.81832e+06	1.10182e+06	1.10924e+06	1.08228e+06	165247	618828	1.29148e+06	361378
CL(17:1/16:1/16:1/18:1)nH	CL	1.17082e+07	1.55064e+07	1.39033e+07	1.73272e+07	1.17422e+07	9.48182e+06	1.08669e+07	1.9294e+06	8.2983e+06
CL(17:1/16:1/18:2/16:1)nH	CL	2.18626e+06	6.2503e+06	2.7459e+06	2.38764e+06	2.49838e+06	1.46724e+06	2.98453e+06	1.99594e+06	952170
CL(18:1/16:0/16:1/18:0)nH	CL	2.73571e+06	4.62668e+06	3.18793e+06	297929	4.24912e+06	0	272328	0	20314.2
CL(18:1/16:0/16:1/18:0)nH	CL	0	0	0	0	0	3.08195e+06	0	0	0
CL(18:1/16:0/16:0/18:1)nH	CL	3.74894e+08	3.66121e+08	3.24238e+08	3.85519e+08	3.28999e+08	1.79881e+07	8.96761e+07	1.19731e+08	8.75195e+07
CL(18:1/16:0/16:1/18:1)nH	CL	3.99161e+08	2.70239e+08	2.5353e+08	236836405	2.3483e+08	5.28925e+07	1.12634e+08	1.99604e+08	1.85976e+08
CL(18:1/16:1/16:1/18:1)nH	CL	3.32726e+08	4.65785e+08	4.28797e+08	3.33397e+08	4.45167e+08	2.361e+08	2.84277e+08	2.48877e+08	2.45469e+08
CL(18:1/16:1/16:1/18:1)nH	CL	6.02136e+06	9.46116e+06	2.25941e+06	9.8997e+06	5.35369e+06	7.56828e+06	3.43695e+06	880144	1.70432e+06
CL(18:2/16:1/18:1/16:1)nH	CL	1.09244e+08	1.77826e+08	1.04852e+08	1.4748e+08	1.32679e+08	1.06306e+08	1.05377e+08	5.56434e+06	6.51602e+07
CL(18:2/16:1/16:1/18:2)nH	CL	3.23015e+07	2.6204e+07	3.44333e+07	2.71628e+07	1.95197e+07	1.53834e+07	2.35978e+07	1.47649e+07	1.63569e+07
CL(17:0/16:0/18:2/18:1)nH	CL	3.12991e+06	958642	279347	360408	1.19798e+06	908575	266946	603255	262101
CL(17:1/16:1/18:1/18:1)nH	CL	3.55685e+07	4.41892e+07	2.67469e+07	3.87769e+07	2.29983e+07	2.33609e+06	2.85115e+07	2.51328e+07	1.47387e+07
CL(17:1/16:1/18:2/18:1)nH	CL	1.16339e+07	1.29805e+07	1.197e+07	1.72458e+07	8.39976e+06	9.87784e+06	1.04073e+07	1.00797e+07	7.71401e+06
CL(17:1/16:1/18:2/18:2)nH	CL	1.05311e+06	3.73147e+06	636072	2.31762e+06	1.36392e+06	692206	1.90412e+06	796793	250892
CL(18:1/16:0/18:0/18:0)nH	CL	3.32389e+07	3.05978e+07	4.41157e+07	2.46123e+07	2.63609e+07	0	9.15752e+06	2.21165e+06	7.15671e+06
CL(18:1/16:0/18:0/18:0)nH	CL	0	818.502	0	206662	266427	2.49768e+07	0	0	0
CL(18:1/16:0/16:1/20:1)nH	CL	4.12159e+06	5.98684e+06	2.19396e+06	1.00787e+07	903360	0	0	67.773	6466.34
CL(18:1/16:0/16:1/20:1)nH	CL	0	2356.89	0	0	0	7.4586e+06	0	0	0
CL(18:1/16:1/18:1/18:1)nH	CL	424490	91277.7	0	2.65302e+06	1.62655e+06	0	0	0	0
CL(18:1/16:1/18:1/18:1)nH	CL	4.84928e+08	4.68708e+08	4.56018e+08	4.9176e+08	4.16433e+08	7.32015e+07	3.09441e+08	2.84168e+08	2.63484e+08
CL(18:2/16:1/18:1/18:1)nH	CL	3.4563e+08	3.57224e+08	3.35079e+08	4.02336e+08	2.57145e+08	2.71594e+08	2.50994e+08	2.28739e+08	1.48871e+08
CL(18:2/16:1/18:2/18:1)nH	CL	1.00089e+08	1.22816e+08	1.11899e+08	1.12564e+08	1.028e+08	6.55527e+07	8.93932e+07	5.98232e+07	4.46062e+07
CL(18:2/16:1/18:2/18:2)nH	CL	1.58204e+07	2.17402e+07	1.36757e+07	1.79638e+07	2.49294e+07	2.86217e+07	1.94387e+07	9.98103e+06	8.744e+06
CL(18:3/18:2/16:1/18:2)nH	CL	1.8459e+06	1.92661e+06	1.66818e+06	2.18255e+06	3.03802e+06	826806	1.65443e+06	1.53498e+06	3.41343e+06
CL(17:1/18:1/18:1/18:1)nH	CL	1.96778e+07	1.38707e+07	1.85392e+07	7.91121e+06	1.38169e+07	526280	1.50817e+07	1.40448e+07	1.0257e+07
CL(17:1/18:1/18:2/18:1)nH	CL	1.32419e+07	9.81108e+06	1.15177e+07	1.86755e+07	9.49229e+06	1.31047e+07	9.83971e+06	1.22763e+07	6.94548e+06
CL(17:1/18:1/18:1/18:2)nH	CL	2.19791e+06	3.35613e+06	1.1636e+06	1.40077e+06	2.99725e+06	5.58997e+06	2.71308e+06	2.08041e+06	831077
CL(17:1/18:2/18:2/18:1)nH	CL	5.08345e+06	3.9789e+06	4.21982e+06	5.45149e+06	3.31703e+06	2.02543e+06	2.10816e+06	4.04209e+06	3.46804e+06
CL(18:2/16:1/20:4/18:1)nH	CL	6.71402e+06	1.3087e+07	1.07819e+07	7.46749e+06	7.4666e+06	6.84779e+06	3.73189e+06	5.17199e+06	1.43006e+06
Cer(d18:1/14:0)pH	Cer	2.25352e+07	1.53859e+07	3.15523e+07	3.54406e+07	2.74394e+07	0	1.36774e+07	3.6624e+07	4.8608e+07
Cer(d18:1/14:0)pH	Cer	0	0	0	0	0	2.65367e+07	0	0	0
Cer(d18:2/14:0)pH	Cer	1.27739e+07	1.33229e+07	9.86306e+06	1.85993e+07	22632.8	9220.74	1.0352e+07	5.52391e+06	2.14172e+07
Cer(d17:1/16:0)pH	Cer	6.95661e+06	6.91953e+06	7.21312e+06	9.03681e+06	28175.7	0	1.32843e+07	1.20756e+07	1.6289e+07
Cer(d18:0/16:0)pH	Cer	2.73702e+06	38520.8	1.67707e+07	1.09596e+07	491940	0	3.67367e+06	46481.8	1.70105e+07
Cer(d18:0/16:0)pH	Cer	1.12673e+08	2.74077e+07	1.02633e+08	1.20667e+08	703385	5.44579e+06	1.13565e+08	5.31394e+07	1.54254e+08
Cer(d18:0/16:0)pH	Cer	0	0	0	0	4.4047e+06	3.41505e+07	0	0	0
Cer(d18:1/16:0)pH	Cer	4.63035e+06	1.48722e+07	7.26524e+06	2.55661e+07	3.48889e+06	0	3.39482e+07	9.52418e+06	4.15525e+07
Cer(d18:1/16:0)nH	Cer	3.02759e+07	1.01398e+06	3.05131e+07	2.90502e+07	2.74342e+07	0	1.08169e+07	1.47258e+07	5.21009e+07
Cer(d18:1/16:0)pH	Cer	6.42634e+08	9.14278e+07	6.83127e+08	6.71301e+08	6.02125e+08	0	4.19758e+08	6.23903e+08	9.45146e+08
Cer(d18:1/16:0)nH	Cer	0	0	0	0	0	7.23747e+06	0	0	0
Cer(d18:1/16:0)pH	Cer	0	0	0	0	47154.9	3.58005e+08	0	0	0
Cer(d18:2/16:0)pH	Cer	5.89028e+07	4.72995e+07	7.35512e+07	5.89512e+07	5.73334e+07	1.19776e+06	1.08235e+08	5.98003e+07	6.38178e+07
Cer(d18:2/16:0)pH	Cer	0	0	0	0	0	4.48666e+07	0	0	0
Cer(d18:0/18:0)pH	Cer	1.12135e+06	7.60469e+06	5.0921e+06	4.60616e+06	0	0	1.21529e+06	1.79717e+07	8.2356e+06
Cer(d18:1/18:0)nH	Cer	3.42009e+06	4.2883e+06	4.10357e+06	4.33706e+06	3.66063e+06	3.17925e+06	3.26989e+06	2.80249e+06	3.82044e+06
Cer(d18:1/18:0)pH	Cer	2.05969e+08	1.837e+08	1.67242e+08	1.58161e+08	1.90699e+08	125583	1.75928e+08	1.94063e+08	1.77527e+08
Cer(d18:2/18:0)pH	Cer	935449	1.34363e+06	1.22389e+06	49712.9	7.92452e+06	0	2.57279e+07	5.21031e+06	2.70653e+06
Cer(d18:0/20:0)pH	Cer	2.61387e+07	2.78408e+07	2.59006e+07	2.52696e+07	192937	943829	3.01932e+07	2.44865e+07	2.5692e+07
Cer(d18:1/20:0)pH	Cer	7.36283e+07	7.04752e+07	6.71142e+07	7.40626e+07	6.22988e+07	473950	6.16786e+07	7.12394e+07	7.57222e+07
Cer(d18:2/20:0)pH	Cer	1.22401e+07	1.43134e+07	1.2433e+07	9.8979e+06	1.30532e+06	0	1.80242e+07	2.62104e+07	2.21687e+07
Cer(d18:0/22:0)pH	Cer	1.52297e+08	1.59629e+08	1.70304e+08	1.32066e+08	1.48983e+08	1.49929e+08	1.27087e+08	1.03718e+08	1.38693e+08
Cer(d18:1/22:0)nH	Cer	1.14235e+07	1.28089e+07	8.56642e+06	1.1415e+07	1.09525e+07	3.73777e+06	9.96493e+06	8.31176e+06	8.96553e+06
Cer(d18:1/22:0)pH	Cer	5.95414e+08	5.97471e+08	6.33797e+08	5.94637e+08	5.86958e+08	3.7578e+08	5.64562e+08	5.28648e+08	5.44057e+08
Cer(d18:2/22:0)nH	Cer	2.97823e+06	4.76126e+06	6.59966e+06	6.75174e+06	3.34257e+06	229649	9.44523e+06	5.80744e+06	4.21659e+06
Cer(d18:2/22:1)pH	Cer	2.45631e+07	7.616e+06	2.67901e+07	1.92924e+07	118854	0	3.66101e+07	4.03102e+07	2.75388e+07
Cer(d17:0/24:0)pNa	Cer	2.08833e+07	2.63016e+07	3.24328e+07	3.76038e+07	198326	0	112993	2.93766e+07	2.60238e+07
Cer(d17:1/24:0)nH	Cer	2.61003e+06	2.65231e+06	2.88172e+06	2.46809e+06	2.47592e+06	24150	3.20659e+06	2.77569e+06	3.13598e+06
Cer(d17:1/24:0)pH	Cer	2.1512e+08	2.11637e+08	2.47561e+08	2.20649e+08	2.39084e+08	2.60802e+08	2.1729e+08	2.12588e+08	2.58205e+08
Cer(d17:1/24:1)pH	Cer	1.71921e+08	1.61149e+08	1.36891e+08	1.97117e+08	1.9222e+08	1.32461e+08	2.70097e+08	2.70064e+08	2.35018e+08
Cer(d18:0/24:0)nH	Cer	2.56703e+06	1.71179e+06	1.90346e+06	1.13641e+06	1.14201e+06	1.20499e+06	1.34052e+06	997157	1.67747e+06
Cer(d18:0/24:0)pH	Cer	2.36518e+08	2.729e+08	3.28583e+08	2.05286e+08	2.1283e+08	1.15347e+08	2.26272e+08	2.35775e+08	2.83793e+08
Cer(d18:1/24:0)pH	Cer	5.08884e+07	6.10209e+07	3.79537e+07	4.83629e+07	3.07834e+07	866268	4.70176e+07	4.72106e+07	4.94432e+07
Cer(d18:1/24:0)nH	Cer	3.72897e+07	4.75012e+07	3.65319e+07	3.77428e+07	3.89414e+07	3.26055e+07	3.4675e+07	2.5102e+07	2.30786e+07
Cer(d18:1/24:0)pH	Cer	2.57963e+09	2.43466e+09	2.81211e+09	2.4407e+09	2.3502e+09	2.71962e+09	1.67355e+09	1.94792e+09	2.61814e+09
Cer(d18:1/24:1)pH	Cer	3.97965e+07	6.98506e+07	2.95088e+08	7.50425e+07	7.62909e+07	1.1672e+06	6.57842e+07	5.58125e+07	1.70104e+08
Cer(d18:1/24:1)nH	Cer	8.12086e+07	9.12265e+07	8.71856e+07	9.33436e+07	8.39249e+07	458611	7.56687e+07	7.42383e+07	8.25839e+07
Cer(d18:1/24:1)pH	Cer	4.78976e+09	3.87903e+09	4.2717e+09	4.55025e+09	3.73547e+09	3.65978e+09	4.5678e+09	4.06149e+09	4.74484e+09
Cer(d18:2/24:1)nH	Cer	2.94822e+07	2.80186e+07	3.04745e+07	2.71718e+07	2.78878e+07	1.84548e+07	3.85603e+07	2.3999e+07	2.41406e+07
Cer(d18:2/24:1)pH	Cer	1.49872e+09	1.64824e+09	1.60883e+09	1.53729e+09	1.34693e+09	1.26697e+09	1.54485e+09	1.52228e+09	1.67736e+09
Cer(d18:2/24:2)pH	Cer	5.0493e+07	4.91918e+07	4.02761e+07	4.53958e+07	3.70042e+07	2.57447e+07	7.66026e+07	6.67063e+07	5.79368e+07
Cer(d18:1/26:0)pH	Cer	4.90412e+07	5.67881e+07	6.67556e+07	6.04125e+07	5.58675e+07	2.22362e+07	3.9067e+07	3.50659e+07	4.31382e+07
Cer(d18:1/26:1)nH	Cer	3.47504e+06	3.77057e+06	3.48299e+06	2.27043e+06	2.79237e+06	172872	1.90148e+06	1.87449e+06	997806
Cer(d18:1/26:1)pH	Cer	2.30909e+08	2.17796e+08	2.91433e+08	2.52277e+08	2.24963e+08	2.22042e+08	1.73528e+08	1.6722e+08	1.69744e+08
Cer(d18:2/26:1)pH	Cer	7.78081e+07	9.38836e+07	8.33354e+07	8.40698e+07	8.55649e+07	6.42873e+07	7.97984e+07	6.7468e+07	8.98438e+07
CerG1(d18:1/14:0)pH	CerG1	7.21804e+07	8.40262e+07	9.36962e+07	8.51709e+07	5.31696e+07	0	4.00855e+06	3.82346e+07	6.96215e+07
CerG1(d18:1/14:0)pH	CerG1	0	0	0	0	0	8.49214e+07	0	0	0
CerG1(d17:1/16:0)pH	CerG1	8.18947e+06	2.47553e+06	3.58896e+06	1.00493e+06	0	0	10642.9	8.01121e+06	1.31503e+07
CerG1(d18:0/16:0)pH	CerG1	9.27619e+07	7.94572e+07	9.8128e+07	1.08519e+08	6.08824e+07	3.28318e+06	8.73682e+07	9.48535e+07	1.11173e+08
CerG1(d18:1/16:0)pH	CerG1	7.7937e+08	8.89722e+08	9.79699e+08	9.76278e+08	7.96091e+08	514771	9.17195e+08	6.58258e+08	9.33418e+08
CerG1(d34:1)pH	CerG1	0	0	0	0	0	9.61931e+08	0	0	0
CerG1(d18:2/16:0)pH	CerG1	9.49793e+07	1.60379e+08	1.07067e+08	1.04742e+08	5.70158e+07	0	6.21278e+07	3.80709e+07	7.45622e+07
CerG1(d18:2/16:0)pH	CerG1	0	0	0	0	0	6.58183e+07	0	0	0
CerG1(d18:1/18:0)pH	CerG1	3.17133e+07	1.16899e+06	4.91299e+07	1.72965e+07	3.67564e+07	0	4.48634e+07	3.79702e+07	5.78086e+07
CerG1(d36:1)pH	CerG1	0	0	0	0	0	3.32331e+07	0	0	0
CerG1(d18:1/22:0)pH	CerG1	6.98146e+08	8.57152e+08	8.33498e+08	7.06847e+08	1.05327e+06	660097	5.35316e+08	6.03824e+08	6.1681e+08
CerG1(d17:1/24:0)pH	CerG1	1.5064e+08	1.47901e+08	1.6009e+08	1.58403e+08	657901	7.73074e+07	1.58574e+08	1.51481e+08	1.41283e+08
CerG1(d17:1/24:1)pH	CerG1	9.08698e+07	1.0007e+08	8.66061e+07	8.05643e+07	104878	0	6.14797e+07	6.9649e+07	7.50411e+07
CerG1(d18:1/24:0)pH	CerG1	1.9567e+09	1.85434e+09	2.11997e+09	2.29169e+09	1.91346e+09	1.89175e+08	1.42456e+09	1.39595e+09	1.44341e+09
CerG1(d18:1/24:0)pH	CerG1	5.70603e+07	8.08343e+07	985571	9.15575e+07	1.76992e+08	5.58667e+07	1.10821e+08	6.41271e+07	1.03248e+06
CerG1(d18:1/24:1)pH	CerG1	3.32426e+09	3.56556e+09	3.65093e+09	3.02383e+09	2.71379e+09	2.17713e+09	2.44301e+09	2.44065e+09	2.4258e+09
CerG1(d18:2/24:1)pH	CerG1	6.17038e+08	5.46518e+08	6.38328e+08	4.89265e+08	5.29255e+08	4.45242e+07	3.64024e+08	3.87361e+08	3.98101e+08
CerG1(d42:3)pH	CerG1	1.48684e+06	15376.2	2.24885e+06	60010.8	6.98915e+06	2.8019e+08	17777.2	7221.19	21011
CerG1(d18:1/26:0)pH	CerG1	6.04553e+07	4.80392e+07	6.94472e+07	4.36436e+07	5.68034e+07	5.35649e+07	3.01498e+07	2.98531e+07	3.90026e+07
CerG1(d18:1/26:1)pH	CerG1	1.49972e+08	1.39707e+08	1.62052e+08	1.56023e+08	1.45474e+08	7.55611e+07	9.29181e+07	8.53535e+07	8.89855e+07
CerG2(d28:0)nH	CerG2	0	0	0	0	0	0	0	0	335820
CerG2(d17:0/15:0)pNa	CerG2	2.50806e+08	3.0343e+07	2.19882e+08	2.75643e+08	1.18551e+08	2.9463e+06	2.61751e+07	2.84097e+07	4.58874e+07
CerG2(d18:1/14:0)pH	CerG2	1.563e+07	3.32192e+07	6.68757e+07	3.21815e+07	2.21558e+07	1.95718e+06	380976	2.03401e+07	3.76065e+07
CerG2(d18:1/14:0)pH	CerG2	6.32742e+06	2.96823e+07	2.4892e+08	8.18135e+06	2.00095e+07	4.11704e+06	1.20119e+07	1.89512e+06	6.45425e+06
CerG2(d17:1/16:0)pH	CerG2	1.37177e+07	1.43957e+07	1.66593e+07	8.74951e+06	50157.7	0	971894	9.77723e+06	5.54071e+06
CerG2(d18:1/16:0)pH	CerG2	1.62589e+08	1.49933e+08	1.75636e+08	2.13003e+08	1.8754e+08	350933	1.79788e+08	6.69638e+07	2.58205e+08
CerG2(d18:1/16:0)pH	CerG2	674098	0	2.86213e+06	1.26377e+06	6.20296e+06	3.96067e+07	498939	0	758037
CerG2(d18:2/16:0)pH	CerG2	6.8258e+07	4.58567e+07	6.07972e+07	5.82957e+07	1.39723e+07	366683	2.65645e+07	2.2081e+07	2.22483e+07
CerG2(d18:2/16:0)pH	CerG2	1.0855e+07	7.49993e+07	3.75049e+07	9.36015e+06	5.18521e+06	2.70182e+07	2.51521e+06	7.15288e+06	2.60499e+07
CerG2(d40:1)pH	CerG2	1.21132e+08	1.38175e+08	1.24286e+08	1.36508e+08	1.34453e+08	9.89469e+07	1.08853e+08	1.15617e+08	1.03873e+08
CerG2(d18:1/22:1)pH	CerG2	1.06765e+07	6.12104e+06	5.78106e+06	3.39779e+07	1.80113e+07	0	37907.9	2.11773e+07	3.21543e+07
CerG2(d18:2/22:0)pH	CerG2	45234	181141	432953	0	0	4.60267e+06	0	125281	154663
CerG2(d17:1/24:1)pH	CerG2	2.09131e+07	1.22546e+07	3.57451e+07	1.70682e+07	1.68678e+07	0	1.98662e+07	2.42637e+07	3.1068e+07
CerG2(d42:1)pH	CerG2	6.98803e+08	6.90455e+08	6.2948e+08	6.26088e+08	5.20387e+08	4.24189e+08	5.3771e+08	5.31145e+08	5.05983e+08
CerG2(d42:2)pH	CerG2	1.46714e+09	1.52228e+09	1.31042e+09	1.28627e+09	1.42879e+09	4.54289e+06	1.19402e+09	1.19966e+09	1.25008e+09
CerG2(d18:2/24:1)pH	CerG2	8.75081e+07	6.36295e+07	191386	1.22883e+08	9.71292e+07	4.98057e+06	4.98027e+07	5.35383e+07	9.89536e+07
CerG2(d18:2/24:1)pH	CerG2	0	0	0	0	0	7.03378e+07	0	0	0
CerG2(d18:1/26:1)pH	CerG2	6.08794e+07	6.63123e+07	6.27426e+07	6.66777e+07	5.44666e+07	6.05467e+06	4.4401e+07	4.89776e+07	5.01177e+07
CerG2GNAc1(d32:1)nH	CerG2GNAc1	6.98447e+06	1.12315e+07	9.55926e+06	4.28901e+06	3.58902e+06	77548.3	1.44395e+06	823957	1.99154e+06
CerG2GNAc1(d32:1)nH	CerG2GNAc1	0	0	0	0	0	5.3252e+06	0	0	0
CerG2GNAc1(d34:1)pH	CerG2GNAc1	1.125e+07	1.70972e+07	1.51073e+06	1.40361e+07	2.90269e+06	0	7.36323e+06	2.46447e+06	5.44686e+06
CerG2GNAc1(d34:2)nH	CerG2GNAc1	2.42398e+06	4.56265e+06	3.18524e+06	674506	810773	0	184803	115795	774755
CerG2GNAc1(d36:1)nH	CerG2GNAc1	1.65749e+06	1.63624e+06	2.76932e+06	1.34319e+06	18670.3	0	656850	392037	1.02643e+06
CerG2GNAc1(d36:3)nH	CerG2GNAc1	2.90221e+06	477853	1.22487e+06	2.25971e+06	2.31135e+06	0	1.94324e+06	1.02503e+06	1.23248e+06
CerG2GNAc1(d36:3)nH	CerG2GNAc1	0	0	0	0	0	2.65062e+06	0	0	0
CerG3(d18:1/16:0)pH	CerG3	9.10923e+07	4.29413e+07	9.35957e+07	1.21743e+08	4.93597e+07	0	3.89401e+07	2.88123e+07	1.02339e+08
CerG3(d18:1/16:0)pH	CerG3	0	0	0	0	0	193901	0	0	0
CerG3(d18:2/16:0)pH	CerG3	6.26969e+06	1.05489e+07	1.05876e+07	3.63984e+06	1.74655e+06	0	1.58788e+06	6.37806e+06	7.29249e+06
CerG3(d18:2/16:0)pH	CerG3	0	0	0	0	0	1.14989e+07	0	0	0
CerG3(d18:1/22:0)pH	CerG3	7.14269e+06	7.3262e+06	9.09122e+06	4.74941e+06	5.19996e+06	0	9.2706e+06	8.73762e+06	5.02752e+06
CerG3(d18:1/24:0)pH	CerG3	2.88902e+07	4.15895e+07	2.51546e+07	2.98544e+07	6.25904e+06	754989	2.874e+07	3.76255e+07	3.16957e+07
CerG3(d18:1/24:1)pH	CerG3	6.69129e+07	7.96957e+07	6.63786e+07	7.1187e+07	7.85247e+07	2.13387e+07	6.28989e+07	1.14402e+08	6.54737e+07
CerG3(d18:2/24:1)pH	CerG3	5.7902e+06	17708.8	24578.6	4.17975e+06	0	0	0	5.32788e+06	6.98382e+06
ChE(15:0)pNH4	ChE	7.11289e+06	1.10288e+07	1.03198e+07	7.02581e+06	0	0	1.18154e+06	10553	1.75243e+06
ChE(16:0)pNH4	ChE	1.53472e+06	3.30773e+06	0	1.14269e+08	1.62415e+06	0	1.56259e+06	1.06549e+06	0
ChE(16:0)pNH4	ChE	132148	82344.4	77400.9	1.68802e+07	1.37196e+08	668139	1.67851e+07	1.95715e+07	131058
ChE(16:1)pNH4	ChE	7.82828e+08	7.19208e+08	7.91605e+08	7.81275e+08	8.98315e+08	5.64004e+08	4.56786e+08	3.01591e+08	4.30363e+08
ChE(16:2)pNH4	ChE	0	0	0	0	0	1.96271e+06	0	0	0
ChE(17:1)pNH4	ChE	4.58555e+08	4.1299e+08	4.8878e+08	4.70704e+08	3.85065e+08	5.06061e+06	2.05893e+08	1.79462e+08	2.37428e+08
ChE(18:0)pNH4	ChE	7.2894e+07	7.97277e+07	7.37004e+06	5.18561e+07	5.00338e+06	73650.8	3.38307e+07	5.8959e+07	2.31626e+06
ChE(18:1)pNH4	ChE	3.38945e+06	1.6366e+07	0	1.87283e+08	487627	0	3.42352e+06	3.63602e+07	0
ChE(18:1)pNH4	ChE	4.96679e+07	5.21479e+07	0	3.45126e+08	1.90878e+09	586783	7.40391e+06	7.15849e+07	698167
ChE(18:1)pH	ChE	3.98928e+06	1.20794e+07	1.91695e+07	1.70574e+06	970298	396166	1.08605e+06	3.88792e+07	3.0463e+07
ChE(18:1)pNH4	ChE	4.58334e+08	1.01831e+09	1.61833e+09	3.73403e+08	4.89074e+08	2.44047e+08	7.24595e+07	1.27872e+09	1.15065e+09
ChE(18:2)pNH4	ChE	5.99418e+09	5.10493e+09	5.97811e+09	5.87495e+09	6.60539e+09	4.36721e+09	3.27335e+09	2.84289e+09	2.7112e+09
ChE(18:2)pH	ChE	1.17544e+08	1.52309e+08	1.17912e+08	1.00482e+08	1.05552e+08	3.5689e+07	1.06175e+07	3.82293e+07	9.03978e+07
ChE(18:3)pNH4	ChE	4.91264e+08	4.09196e+08	4.38926e+08	4.37023e+08	5.87507e+08	4.3441e+08	2.16552e+08	1.60663e+08	1.54292e+08
ChE(19:2)pNH4	ChE	1.13235e+08	9.26737e+07	1.30682e+08	1.01573e+08	8.30805e+07	1.71253e+06	1.10609e+08	7.10593e+07	1.33296e+08
ChE(20:1)pNH4	ChE	4.51353e+07	7.08954e+07	5.86236e+07	3.17699e+07	226634	1.48142e+06	8.6649e+07	1.37062e+08	3.93149e+07
ChE(20:2)pNH4	ChE	1.59295e+07	3.87502e+07	4.68176e+07	2.36882e+07	1.30831e+07	1.6522e+08	1.30995e+07	3.00619e+07	4.92498e+07
ChE(20:3)pNH4	ChE	1.08395e+09	9.18497e+08	1.29657e+09	1.41082e+09	1.29027e+09	7.76152e+08	6.07914e+08	5.93364e+08	7.98122e+08
ChE(20:4)pNH4	ChE	4.8741e+09	4.43121e+09	3.16407e+09	4.40041e+09	5.70605e+09	3.02741e+09	2.28561e+09	1.4309e+09	2.11459e+09
ChE(20:4)pH	ChE	1.50848e+08	1.45125e+08	1.46899e+06	1.72722e+08	2.18633e+08	1.03149e+08	8.21658e+07	5.62027e+07	4.51417e+07
ChE(20:4)pH	ChE	2.84066e+08	4.50749e+08	6.447e+08	1.86647e+08	6.72631e+06	2.54546e+06	4.27023e+07	4.66468e+08	5.00805e+08
ChE(20:5)pH	ChE	6.47755e+07	5.59389e+07	6.31192e+07	4.32611e+07	4.66755e+07	4.95391e+07	2.85041e+07	2.95262e+07	2.91097e+07
ChE(20:5)pNH4	ChE	3.79716e+08	3.94799e+08	4.03223e+08	3.45325e+08	4.08453e+08	2.91626e+08	176282	8.8042e+07	1.09487e+08
ChE(20:5)pH	ChE	2.56678e+08	2.49168e+08	3.3425e+08	3.20691e+08	1.91189e+08	3.27742e+08	1.74238e+08	1.18273e+08	1.04185e+08
ChE(21:3)pNH4	ChE	3.43383e+07	4.344e+07	2.40632e+07	1.57181e+07	1.29382e+07	0	2.27337e+07	2.53563e+07	2.58629e+07
ChE(21:5)pH	ChE	6.16613e+06	5.11929e+06	2.0366e+06	1.00247e+07	2.64101e+07	422097	3.9605e+07	2.48016e+07	2.39103e+07
ChE(22:1)pNH4	ChE	2.03396e+06	1.45326e+06	843721	1.68621e+06	3.83643e+06	5.2288e+07	5.11426e+06	2.22963e+07	314833
ChE(22:4)pNH4	ChE	1.91665e+08	1.60289e+08	1.65131e+08	1.90215e+08	1.66249e+08	3.84797e+06	1.54939e+08	1.29918e+08	2.20561e+08
ChE(22:5)pNH4	ChE	2.62351e+08	2.69264e+08	3.03736e+08	4.21119e+08	7.94432e+07	4.20023e+07	2.23426e+08	1.97437e+08	2.25233e+08
ChE(22:6)pNH4	ChE	1.08811e+09	1.09098e+09	1.11198e+09	1.02883e+09	1.30046e+09	8.60881e+08	1.79195e+06	4.58655e+08	4.73128e+08
ChE(22:6)pH	ChE	8.67977e+07	7.79627e+07	1.12648e+08	8.72755e+07	1.31799e+08	9.56912e+07	2.94594e+07	1.84462e+07	1.10922e+07
ChE(23:4)pNH4	ChE	1.11562e+06	12221.2	4.20501e+06	25316.7	0	24559.6	10540.3	3.39668e+06	4.49014e+06
ChE(24:1)pNH4	ChE	0	1.11198e+06	0	7.62895e+06	0	0	0	1.15299e+06	0
ChE(24:2)pNH4	ChE	1.47791e+06	3.59334e+06	218687	657168	5.87999e+07	3.43879e+07	3.85309e+06	6.89184e+07	2.17223e+07
ChE(24:5)pNH4	ChE	1.45317e+08	1.34063e+08	1.6517e+08	1.1126e+08	1.34847e+08	4.61995e+07	1.84979e+08	1.46718e+08	2.62195e+08
ChE(24:6)pNH4	ChE	8.42844e+06	137373	7.09186e+06	7.68793e+06	2.5282e+06	6.02909e+06	1.88999e+07	1.58527e+07	2.35412e+07
ChE(26:1)pNH4	ChE	1.20093e+07	7.05465e+07	0	537432	0	0	4.61556e+07	1.06709e+08	0
ChE(26:4)pNH4	ChE	2.97568e+07	1.83375e+07	7260.6	50691.2	1.10334e+06	0	5.59099e+07	7.03608e+07	165066
ChE(26:6)pNH4	ChE	2.53902e+07	1.64003e+07	2.16815e+07	2.65398e+07	3.82636e+07	5.80707e+06	6.51465e+07	3.18666e+07	6.63541e+07
DG(16:0e)pNa	DG	8.32662e+07	1.42216e+08	1.09861e+08	6.82978e+07	8.18887e+07	0	5.89863e+07	4.6519e+07	6.84087e+07
DG(16:0e)pNa	DG	486.095	312624	257394	367548	250458	7.74631e+07	126340	43392.3	196805
DG(18:0p)pNa	DG	5.54393e+07	8.40465e+07	7.03221e+07	3.96051e+07	3.38401e+07	0	1.0673e+08	9.86742e+07	1.18729e+08
DG(22:0p)pNa	DG	8.34785e+06	2.64843e+07	1.87881e+07	862662	11547.8	256980	2.32827e+07	6.73953e+07	6.41506e+07
DG(28:0e)pNa	DG	1.23796e+08	1.17194e+08	1.44645e+08	6.30188e+07	1.20018e+08	1.04244e+08	4.42195e+07	8.88804e+07	8.9538e+07
DG(28:0e)pNa	DG	7.95144e+07	7.5112e+07	8.24464e+07	6.6612e+07	7.25786e+07	2.47227e+07	6.61089e+07	6.00817e+07	6.81318e+07
DG(28:1p)pH	DG	2.97336e+07	2.94215e+07	3.76909e+07	3.8405e+07	2.75601e+07	1.19725e+07	3.0123e+07	3.97521e+07	4.46153e+07
DG(16:0/14:0)pNH4	DG	1.26476e+08	1.03444e+08	1.3643e+08	1.75804e+08	1.57788e+08	0	4.84356e+07	4.68787e+07	4.34192e+07
DG(16:0/14:0)pNH4	DG	0	0	0	0	707406	6.21798e+07	0	0	0
DG(30:0e)pNa	DG	1.0312e+08	6.28691e+07	7.63503e+07	1.06823e+08	7.91795e+07	6.4368e+07	3.26675e+07	2.24914e+07	3.5462e+07
DG(30:0e)pNa	DG	0	355749	0	1.22523e+06	0	9.67431e+07	0	0	0
DG(30:0e)pNa	DG	6.5542e+08	4.71478e+08	6.31602e+08	5.897e+08	4.75288e+08	191678	3.17695e+08	3.30385e+08	3.0284e+08
DG(30:0e)pNa	DG	3.83768e+08	4.47151e+08	4.08953e+08	4.80154e+08	6.46702e+08	4.26657e+08	1.06695e+08	2.71334e+08	2.30924e+08
DG(30:0e)pNa	DG	2.8066e+08	2.50418e+08	2.37443e+08	2.43834e+08	2.54191e+08	1.45652e+08	3.41776e+08	2.51847e+08	2.77031e+08
DG(30:0e)pNa	DG	4.01962e+06	2.34313e+07	6.32562e+06	5.16027e+06	5.93108e+06	1.45566e+06	5.43132e+06	5.44806e+06	6.12761e+06
DG(30:1e)pNa	DG	2.3072e+07	2.71625e+07	5.03076e+07	6.63587e+07	4.80727e+07	334828	3.47342e+07	2.8978e+07	4.00513e+07
DG(30:1e)pNa	DG	4.19514e+08	5.69877e+08	6.24674e+08	3.6078e+08	3.49732e+08	2.22538e+08	3.58968e+08	2.98231e+08	3.03486e+08
DG(30:1p)pH	DG	36357.4	2.99347e+07	4.22914e+06	1.12995e+07	1.28781e+07	5319.78	1.43652e+06	702355	12181.7
DG(30:1p)pH	DG	0	719203	0	965438	8.13813e+06	1.99058e+07	5.26015e+06	0	0
DG(30:1p)pH	DG	3.19404e+08	2.84704e+08	3.22855e+08	2.41296e+08	1.61183e+06	0	9.79062e+07	1.05892e+08	1.06575e+08
DG(30:1p)pH	DG	99705.8	1.41376e+08	1.31364e+08	1.11675e+08	1.17078e+08	2.78139e+07	9.89175e+07	3.09101e+07	1.11778e+08
DG(30:2p)pH	DG	8.39606e+06	1.84813e+07	2.62695e+07	1.56539e+07	1.59135e+07	77463.4	3.8087e+06	3.79522e+06	5.10955e+06
DG(31:0e)pNa	DG	8.1641e+07	7.72836e+07	5.23379e+07	4.04414e+07	5.39181e+07	0	5.23044e+07	4.60221e+07	4.59133e+07
DG(16:0/16:0)pNH4	DG	7.993e+08	7.17409e+08	7.88648e+08	8.73285e+08	8.57389e+08	6.6073e+08	2.65362e+08	2.68856e+08	2.87134e+08
DG(16:0/16:0)pH	DG	6.96356e+07	3.70008e+07	3.42095e+07	89287.8	5.48594e+07	0	9.31704e+06	9.08761e+06	6.89403e+06
DG(32:0e)pNa	DG	1.73604e+09	1.78304e+09	1.11265e+09	1.49723e+09	1.96776e+09	4.79631e+08	1.4533e+09	9.11965e+08	5.95934e+08
DG(32:0e)pNa	DG	1.7434e+09	1.84079e+09	1.49266e+09	1.6512e+09	2.03436e+09	1.45041e+09	9.18403e+08	8.97324e+08	8.07804e+08
DG(32:0e)pNa	DG	1.08258e+09	7.86823e+08	7.54924e+08	9.44505e+08	9.34351e+08	6.02838e+08	7.01521e+08	5.72241e+08	5.90769e+08
DG(32:0p)pNa	DG	1.04506e+08	7.46073e+07	2.68772e+07	5.50214e+07	7.26749e+07	5.02242e+07	6.84725e+07	6.89201e+07	1.75898e+07
DG(18:1/14:0)pNH4	DG	5.78599e+08	5.14825e+08	5.62829e+08	6.45096e+08	6.22005e+08	0	2.68878e+08	3.05175e+08	3.04533e+08
DG(18:1/14:0)pH	DG	3.17958e+07	1.84679e+07	4.523e+07	1.23538e+07	4.63996e+06	0	2.55423e+06	6.0419e+06	1.07029e+07
DG(18:1/14:0)pNH4	DG	0	3.07314e+06	0	34959.2	1.06746e+07	2.83347e+08	2.69602e+06	0	0
DG(32:1e)pNa	DG	3.79252e+06	9.73097e+06	1.2369e+07	1.37626e+07	9.44341e+06	2547.24	1.30381e+06	4.7985e+06	9.5037e+06
DG(32:1e)pNa	DG	1.1562e+09	4.38013e+08	4.15998e+08	1.33509e+09	3.15724e+08	6.12934e+08	1.555e+08	2.11942e+08	3.31458e+08
DG(32:1e)pNa	DG	1.84002e+07	2.67072e+07	1.74707e+06	2.39865e+07	2.83326e+07	2.45077e+08	1.03654e+07	3.03743e+07	8.58891e+06
DG(32:1e)pNa	DG	1.24314e+08	1.86265e+08	1.88896e+08	1.53114e+08	1.54274e+08	1.32315e+07	8.43788e+07	3.60979e+07	5.43656e+07
DG(32:1e)pNa	DG	0	0	0	394630	341766	1.78108e+08	0	0	0
DG(32:1e)pNa	DG	3.77176e+08	3.48275e+08	3.19645e+08	3.27574e+08	2.0548e+08	2.51963e+08	3.63893e+08	2.93881e+08	2.696e+08
DG(32:1e)pNa	DG	3.02463e+07	1.68293e+08	1.0924e+07	3.7866e+07	1.67536e+08	5.55877e+07	3.6545e+07	8.92995e+07	1.83847e+07
DG(32:1e)pNa	DG	1.04506e+08	2.53839e+07	2.54652e+07	8.92059e+07	7.25801e+07	5.02242e+07	6.84725e+07	5.55496e+07	1.75898e+07
DG(32:1p)pNa	DG	3.51007e+07	3.04421e+07	4.57416e+07	4.2321e+07	2.14858e+07	468362	3.21216e+07	2.95229e+07	2.76549e+07
DG(32:1p)pH	DG	14973.1	2.59346e+06	29322.4	3.20914e+06	7.86885e+06	0	1.77887e+06	6155.84	0
DG(32:1p)pH	DG	1.53074e+09	1.42226e+09	1.47617e+09	1.2438e+09	1.2386e+09	8.88863e+08	5.07034e+08	4.52139e+08	4.96632e+08
DG(32:1p)pNa	DG	1.23787e+08	4.48521e+08	1.4394e+08	1.00357e+08	8.1552e+07	3.22947e+08	3.81477e+08	3.84788e+08	4.03893e+08
DG(32:1p)pH	DG	4.86984e+07	2.2463e+08	2.40331e+08	2.11122e+08	1.23937e+07	2.41025e+07	1.25991e+08	6.41805e+07	1.5571e+08
DG(16:1/16:1)pNH4	DG	5.66952e+06	2.27844e+07	4.3603e+06	5.29455e+06	20367.2	0	0	2.10705e+06	41478.4
DG(32:2e)pNa	DG	2.37229e+06	6.91778e+06	4.57416e+07	8.6397e+06	5.12283e+06	1.21438e+06	7.7145e+06	2.45899e+06	3.00538e+06
DG(32:2p)pH	DG	4.08629e+08	1.73282e+08	4.66653e+08	5.14788e+08	1.99565e+08	5.66091e+07	2.46126e+08	1.80861e+08	3.5625e+08
DG(32:2p)pH	DG	2.20435e+08	2.44497e+08	2.48003e+08	3.4124e+08	1.43273e+08	5.69628e+07	4.31007e+07	1.50686e+08	1.81258e+06
DG(32:2p)pH	DG	4.8584e+06	8.69827e+06	1.53675e+07	4.27634e+06	1.3348e+07	2.54005e+08	1.66232e+06	3.77297e+07	2.13278e+07
DG(32:2p)pH	DG	9.24662e+07	6.8537e+07	7.72244e+07	1.0491e+08	8.0988e+07	6.47441e+07	3.37406e+07	2.25098e+07	1.72594e+07
DG(32:3p)pH	DG	4.99383e+07	1.04184e+08	9.6172e+07	1.35552e+08	4.79722e+07	488990	6.97839e+07	2.16573e+07	2.56743e+07
DG(33:0e)pNa	DG	1.5779e+07	5.44181e+06	1.05753e+07	2.37967e+06	0	0	0	4.81405e+06	4.07716e+06
DG(17:1/16:0)pNH4	DG	7.0867e+07	6.44809e+07	4.71289e+07	6.71088e+07	1.02307e+07	1.84681e+06	4.60896e+07	5.07038e+07	3.80457e+07
DG(33:1e)pNa	DG	3.35904e+07	3.18977e+07	2.39429e+07	2.12416e+07	93917.1	0	3.52258e+07	3.44144e+07	3.70142e+07
DG(33:1e)pNa	DG	3.74967e+07	3.28548e+07	1.13486e+08	1.17567e+08	4.82182e+07	1.60863e+07	4.02677e+07	3.74539e+07	7.69135e+07
DG(33:1e)pNa	DG	5.59913e+06	2.76103e+06	1.50429e+06	2.14619e+06	651806	14878.8	1.36181e+07	3.87454e+06	1.4369e+07
DG(33:2p)pH	DG	2.24025e+07	1.42584e+07	2.61509e+07	1.88758e+07	1.12248e+07	0	1.73187e+07	1.24697e+07	1.13053e+07
DG(33:2p)pH	DG	0	0	0	0	0	3.19462e+07	0	0	0
DG(33:2p)pH	DG	8.1641e+07	7.68523e+07	5.42325e+07	6.88094e+06	5.39181e+07	0	5.22756e+07	4.36592e+07	4.15481e+07
DG(33:2p)pH	DG	1.07528e+07	1.35832e+07	3.86649e+06	1.28733e+07	34493.3	32658.1	28921.5	1.42126e+07	4.09228e+07
DG(18:0/16:0)pNH4	DG	7.29514e+08	6.85679e+08	9.50053e+08	9.39494e+08	9.43158e+08	5.66712e+08	3.19695e+08	3.07389e+08	2.99909e+08
DG(18:0/16:0)pH	DG	3.81766e+07	4.04765e+07	6.00011e+07	3.83055e+07	3.94373e+07	0	1.22024e+07	9.02997e+06	1.37684e+07
DG(34:0e)pNa	DG	5.69407e+08	6.24564e+08	4.6412e+08	6.69651e+08	6.11446e+08	2.26694e+07	4.76436e+08	6.08128e+08	5.9735e+08
DG(34:0e)pNa	DG	6.46527e+07	5.77877e+07	5.2512e+07	7.54568e+07	3.41513e+07	4.05247e+07	1.13261e+08	7.96724e+07	8.0726e+07
DG(34:0p)pNH4	DG	3.01933e+08	3.48482e+08	3.30374e+08	2.15464e+08	2.07869e+08	1.66482e+08	1.51568e+08	1.24784e+08	1.62165e+08
DG(16:0/18:1)pNH4	DG	2.8285e+09	2.53196e+09	2.63861e+09	2.884e+09	3.07489e+09	2.29966e+09	1.71516e+09	1.65277e+09	1.72981e+09
DG(16:0/18:1)pH	DG	1.72959e+08	1.40245e+08	1.52932e+08	1.59042e+08	1.73275e+08	1.30301e+08	9.7289e+07	9.15202e+07	9.14777e+07
DG(16:0/18:1)pNa	DG	9.50668e+07	4.12756e+07	7.29504e+07	5.70544e+07	5.47606e+07	0	6.18191e+07	6.38605e+07	6.35341e+07
DG(34:1e)pNa	DG	4.47926e+08	4.8968e+07	3.78181e+08	4.83448e+08	4.03988e+08	2.28846e+07	2.67504e+08	2.42777e+08	2.8838e+08
DG(34:1e)pNa	DG	3.36554e+07	3.26363e+07	1.60828e+07	2.13168e+07	1.29538e+08	4.38422e+08	7.74353e+07	9.86036e+06	8.20369e+06
DG(34:1e)pNa	DG	3.18982e+08	4.24458e+08	3.83781e+08	3.95837e+08	3.79074e+08	3.30298e+08	5.58593e+08	4.42707e+08	4.76928e+08
DG(34:1p)pNa	DG	4.41921e+07	3.13314e+07	7.96528e+07	9.45741e+07	4.85198e+07	8.39604e+06	3.42562e+07	1.7049e+07	1.61006e+07
DG(34:1p)pNa	DG	0	0	0	0	0	7.54673e+07	0	0	0
DG(34:1p)pH	DG	1.24993e+09	1.36819e+09	1.57534e+09	1.09194e+09	9.6302e+08	7.32908e+08	4.12738e+08	4.46214e+08	5.19625e+08
DG(34:1p)pNa	DG	1.56909e+09	1.65753e+09	1.6897e+09	1.55844e+09	1.56187e+09	1.05952e+09	1.15498e+09	1.12789e+09	1.20539e+09
DG(34:1p)pH	DG	1.24312e+08	5.84748e+07	1.34309e+08	9.94637e+07	1.33793e+08	1.12113e+07	1.16904e+08	7.3763e+07	1.31391e+08
DG(34:1p)pNa	DG	5.56478e+07	4.66445e+07	1.23289e+07	5.35096e+07	8.06876e+06	2.53334e+07	4.45105e+07	6.72779e+06	2.40929e+07
DG(16:1/18:1)pNH4	DG	5.93357e+08	3.54791e+08	5.79926e+08	5.77721e+08	3.79038e+08	1.16975e+08	3.8359e+08	3.88146e+08	2.70071e+08
DG(16:1/18:1)pNH4	DG	5.75655e+06	1.78848e+07	909968	1.76955e+07	3.95623e+07	2.65767e+08	1.71135e+07	1.03649e+06	1.23654e+06
DG(34:2e)pNa	DG	7.95515e+07	6.2047e+07	4.47762e+07	3.92484e+07	4.1534e+07	1.95884e+07	9.52094e+07	6.69342e+07	7.31128e+07
DG(34:2e)pNa	DG	1.51197e+09	1.58583e+09	1.63508e+09	1.51612e+09	1.54086e+09	1.07309e+09	1.15498e+09	9.20558e+08	1.18283e+09
DG(34:2p)pNa	DG	2.205e+08	6.53174e+07	1.94132e+08	2.42098e+08	1.31817e+08	150458	1.61792e+08	2.51788e+08	1.99612e+08
DG(34:2p)pNa	DG	0	888453	0	946892	1.30464e+06	2.53595e+08	1.66637e+06	3.01596e+06	21329.7
DG(34:2p)pH	DG	1.2962e+09	1.01806e+09	1.00985e+09	9.96311e+08	8.8935e+08	318881	1.67137e+08	4.64915e+08	4.78172e+08
DG(34:2p)pH	DG	2.45404e+08	5.46135e+07	2.95451e+08	3.13234e+08	2.69843e+08	6.31328e+07	7.32935e+07	3.14208e+07	2.05255e+08
DG(34:2p)pH	DG	1.12895e+06	44899.7	3.74945e+06	5.13134e+06	120322	2.05147e+08	1.94414e+06	1.32176e+06	4.86494e+06
DG(34:2p)pNa	DG	4.22252e+07	1.35452e+08	1.50671e+08	1.11133e+08	1.6152e+08	3.10188e+07	1.56657e+08	1.28836e+08	1.16619e+08
DG(34:2p)pH	DG	1.08258e+09	1.11701e+09	1.03424e+09	7.21483e+08	9.34351e+08	6.02838e+08	6.74013e+08	5.72241e+08	5.90769e+08
DG(34:3p)pNa	DG	1.21178e+07	1.56309e+07	2.86514e+07	2.27371e+07	1.32704e+07	0	9.93107e+06	7.87535e+06	9.05298e+06
DG(34:3p)pNa	DG	1.07445e+07	1.1537e+07	2.54884e+07	3.72763e+06	1.04996e+07	0	3.36432e+06	2.70954e+07	1.21868e+07
DG(34:3p)pH	DG	7.30041e+08	5.05507e+08	7.90993e+08	7.7082e+08	5.2833e+08	1.51282e+07	4.24058e+08	4.32814e+08	3.53624e+08
DG(34:3p)pNa	DG	1.89247e+07	7.56781e+06	2.19212e+07	1.91907e+07	9.10207e+06	1.9205e+07	6.38578e+06	43069.7	8.21845e+06
DG(34:3p)pNa	DG	2.5292e+07	4.21366e+06	1.00737e+07	8.97462e+06	1.17726e+06	468957	4.8436e+06	4.16036e+06	3.41092e+06
DG(34:3p)pH	DG	1.79964e+07	2.72498e+07	1.17225e+07	1.51524e+07	3.33025e+07	9.79214e+08	2.65664e+07	3.12038e+07	8.91742e+06
DG(17:1/18:1)pNH4	DG	4.90564e+07	4.2661e+07	3.97351e+07	4.88942e+07	4.07752e+07	1.87582e+07	4.80584e+07	4.15845e+07	4.22319e+07
DG(35:2p)pNa	DG	3.13723e+07	5.64898e+06	2.16149e+07	2.27144e+07	1.03348e+07	0	2.46412e+07	1.56886e+07	5.42124e+07
DG(35:2p)pNa	DG	0	0	0	0	0	5.12387e+07	0	0	0
DG(35:2p)pH	DG	6.17686e+07	487210	7.80261e+07	8.4978e+07	5.65123e+07	2.05661e+06	5.15333e+07	1.65337e+07	3.60721e+07
DG(35:2p)pH	DG	0	58632	0	0	0	6.58469e+07	0	0	0
DG(35:2p)pH	DG	8.0315e+07	8.11171e+07	6.64284e+07	6.3888e+07	5.99828e+07	4.5327e+07	8.30294e+07	6.37487e+07	7.84734e+07
DG(35:3p)pNa	DG	6.40465e+06	8.57494e+06	6.28311e+06	1.53166e+07	4.60691e+06	0	2.11434e+06	7.19456e+06	3.24529e+06
DG(35:3p)pH	DG	1.05646e+08	1.1741e+08	8.33983e+07	3.21602e+07	5.66227e+07	0	2.78297e+07	3.51143e+06	6.10726e+07
DG(35:3p)pNa	DG	0	0	0	0	0	1.34611e+07	0	10569.1	0
DG(35:3p)pH	DG	6.08173e+06	5.82867e+06	9.65079e+06	6.4969e+06	2.82793e+06	0	2.15066e+07	1.28631e+07	2.019e+06
DG(35:3p)pH	DG	0	0	0	0	0	1.05417e+08	0	0	0
DG(18:0/18:0)pNH4	DG	4.47896e+08	4.49578e+08	4.66897e+08	2.77779e+08	5.24454e+08	5.64516e+08	2.19181e+08	2.14657e+08	2.45349e+08
DG(36:0e)pNa	DG	3.64985e+07	4.12221e+07	2.57957e+07	1.53563e+07	6.73998e+06	873058	4.05436e+07	3.12128e+07	2.58865e+07
DG(36:0p)pNa	DG	4.16128e+07	1.54719e+08	5.0273e+07	1.60991e+08	1.56775e+08	1.74405e+07	1.46665e+08	1.53135e+08	7.28961e+07
DG(16:0/20:1)pNH4	DG	9.03551e+08	8.75604e+08	1.10962e+09	1.14952e+09	1.25619e+09	7.64033e+08	7.57231e+08	7.96619e+08	9.50745e+08
DG(16:0/20:1)pH	DG	4.43807e+07	3.78636e+07	4.86292e+07	4.87862e+07	5.25477e+07	3.25245e+07	3.98645e+07	4.7772e+07	5.04053e+07
DG(36:1e)pNa	DG	9.47865e+07	3.72458e+07	3.48386e+07	5.56119e+07	2.67162e+07	1.95242e+06	2.49643e+07	2.53013e+07	3.1652e+07
DG(36:1e)pNa	DG	2.64844e+06	1.24473e+07	1.02644e+07	1.61407e+07	1.41597e+07	1.06118e+08	1.53859e+07	1.56144e+07	4.29824e+06
DG(36:1e)pNH4	DG	2.74537e+07	791747	2.95328e+07	2.02559e+07	2.76105e+07	5.12375e+07	3.22949e+07	2.30909e+07	181448
DG(36:1e)pNa	DG	1.1868e+07	9.66648e+06	1.54258e+07	9.68289e+06	3.40437e+07	3.01379e+06	2.42833e+07	7.7536e+07	5.04251e+07
DG(36:1p)pNa	DG	2.45286e+08	2.36667e+07	2.3029e+07	9.17049e+07	9.0987e+07	6.74246e+06	3.83527e+08	3.45676e+08	1.80315e+08
DG(36:1p)pNa	DG	2.46362e+08	5.70607e+07	2.84674e+08	3.76485e+08	2.24863e+08	1.00426e+08	4.53188e+08	1.07721e+08	6.83347e+07
DG(36:1p)pNa	DG	4.68094e+06	230031	2.46352e+06	9.31026e+06	1.52618e+07	2.93377e+08	1.94052e+06	2.09498e+06	3.24678e+06
DG(36:1p)pNa	DG	0	3.73372e+06	1.10221e+06	1.41731e+07	2.1077e+07	0	7.36137e+06	16586	0
DG(18:1/18:1)pNa	DG	7.82588e+06	3.81835e+06	1.1413e+07	8.57019e+06	9.87092e+06	1.32016e+06	4.02907e+06	119703	2.02423e+06
DG(18:1/18:1)pH	DG	6.58055e+06	1.03718e+06	1.27012e+07	1.26065e+07	87968	849187	3.16275e+06	2.74631e+06	1.43069e+06
DG(18:1/18:1)pNa	DG	895.129	4244.33	85829.3	61276.9	124769	9.537e+06	76857.5	0	1091.71
DG(18:1/18:1)pH	DG	1847.3	193690	0	3259.09	197992	1.17581e+07	0	0	0
DG(18:1/18:1)pNH4	DG	1.25731e+09	1.1739e+09	1.23864e+09	1.22292e+09	1.27009e+09	9.60233e+08	1.38382e+09	1.45651e+09	1.59131e+09
DG(18:1/18:1)pH	DG	5.89608e+07	5.6227e+07	5.6829e+07	3.43471e+07	4.92509e+07	4.30244e+06	5.64539e+07	5.52074e+07	6.90113e+07
DG(18:1/18:1)pNa	DG	2.21637e+07	1.11309e+07	1.46862e+07	4.64374e+06	6.58564e+06	0	4.24031e+07	5.10229e+07	5.83173e+07
DG(36:2p)pNa	DG	1.59846e+08	1.33638e+08	1.46319e+08	1.88136e+08	9.24509e+07	1.09095e+08	1.3666e+08	8.5171e+06	1.24113e+08
DG(36:2p)pNa	DG	1.44808e+07	6.0374e+07	2.0626e+07	9.32532e+07	4.81821e+07	1.19063e+08	9.6072e+07	1.2752e+08	7.26001e+07
DG(36:2p)pNa	DG	8.84358e+08	9.03952e+08	8.98832e+08	1.00279e+09	8.62168e+08	1.96869e+08	1.47474e+09	1.42994e+09	1.25341e+09
DG(36:2p)pNa	DG	4.62403e+08	6.91157e+08	4.2376e+08	9.9983e+08	8.66224e+08	8.66214e+07	1.17717e+09	6.05622e+08	4.21607e+08
DG(36:2p)pNa	DG	9.59523e+07	1.84732e+07	8.75138e+07	5.18919e+07	1.11225e+06	1.51743e+06	1.03451e+07	2.68119e+07	1.17232e+08
DG(36:2p)pH	DG	4.20255e+08	4.05118e+08	4.39659e+08	4.38522e+08	3.80822e+08	2.85512e+08	3.20063e+08	2.90103e+08	2.96147e+08
DG(36:2p)pH	DG	8.06078e+08	9.09423e+08	9.63021e+08	8.13327e+08	7.16364e+08	4.54838e+06	6.91804e+08	6.67647e+08	8.05432e+08
DG(36:2p)pH	DG	1.18949e+08	1.21826e+08	1.20781e+08	1.20432e+08	1.70669e+08	4.97731e+06	1.83026e+08	1.86509e+08	1.67114e+08
DG(18:1/18:2)pNH4	DG	1.69227e+08	1.32843e+08	1.33348e+08	1.09443e+08	1.50287e+08	1.87847e+07	1.27278e+08	2.01664e+08	2.06217e+08
DG(18:1/18:2)pNH4	DG	0	0	0	43117.7	1.20244e+06	1.00196e+08	5.60405e+06	1.21667e+06	0
DG(36:3p)pH	DG	6.70593e+08	4.72653e+08	7.24709e+08	6.81567e+08	5.04403e+08	1.34033e+07	4.00876e+08	2.2218e+08	3.21154e+08
DG(36:3p)pH	DG	1.53967e+08	8.99942e+08	1.89709e+08	1.07228e+09	1.79836e+08	1.34033e+07	3.63955e+08	1.61862e+08	1.60919e+08
DG(36:3p)pH	DG	1.22318e+08	2.3755e+08	1.50876e+08	2.0359e+08	1.63811e+08	7.25698e+08	2.62662e+08	1.36634e+08	9.85685e+07
DG(36:3p)pNa	DG	0	0	0	0	1.87862e+06	1.09963e+08	0	0	0
DG(16:0/20:4)pNH4	DG	1.82696e+07	3.13136e+07	1.70602e+07	1.75355e+07	5.28365e+06	0	4.5862e+07	3.73849e+07	5.96203e+07
DG(36:4p)pH	DG	1.52817e+08	1.15337e+08	9.20421e+07	1.64329e+08	4.66609e+07	1.4769e+06	6.75512e+07	4.90099e+07	8.09299e+07
DG(36:4p)pH	DG	5.41257e+06	7.59568e+06	1.80411e+06	1.75033e+06	4.45483e+07	2.29527e+07	2.22409e+07	1.53552e+07	3.41508e+07
DG(16:0/21:1)pNH4	DG	0	2.23736e+06	0	522490	7.58564e+06	2.096e+07	1428188	303860	0
DG(19:1/18:1)pNH4	DG	2.73282e+07	4.07547e+07	3.33953e+07	3.84678e+07	2.13913e+07	1.946e+07	6.025e+07	5.15551e+07	6.83542e+07
DG(37:3p)pNa	DG	3.15423e+07	2.3404e+07	3.07979e+07	3.99334e+07	1.78177e+07	0	4.78092e+06	1.51413e+07	3.31984e+07
DG(37:3p)pNa	DG	0	0	0	0	0	3.68555e+07	0	0	0
DG(37:6e)pH	DG	3.13723e+07	2.73023e+07	3.18207e+07	3.53986e+07	7.38453e+06	0	2.4265e+07	1.76058e+07	5.42124e+07
DG(16:0/22:0)pNH4	DG	5.4702e+07	5.78681e+07	6.72141e+07	3.2857e+07	5.5203e+07	7.30061e+07	1.94922e+07	1.83857e+07	2.18962e+07
DG(38:0p)pNa	DG	4.16806e+07	2.50909e+07	2.31704e+07	1.76917e+07	3.83825e+07	31492.3	8.12554e+06	3.49104e+07	3.2242e+07
DG(16:0/22:1)pNH4	DG	3.59531e+08	3.509e+08	4.24657e+08	3.57094e+08	4.22031e+08	4.02928e+08	2.28632e+08	2.20534e+08	2.49577e+08
DG(38:1e)pNa	DG	1.94804e+08	1.80416e+08	2.22729e+08	1.29911e+08	1.38692e+08	1.40128e+08	1.43505e+08	1.30589e+08	1.6141e+08
DG(38:1p)pNa	DG	3.15041e+06	2.88983e+07	9.23889e+06	1.99553e+07	1.31891e+07	0	45978.5	848244	0
DG(20:1/18:1)pNH4	DG	3.66788e+08	3.64473e+08	4.23629e+08	4.11395e+08	4.34511e+08	3.11535e+06	5.26386e+08	5.09715e+08	5.79629e+08
DG(38:2p)pH	DG	3.57432e+07	3.82438e+07	4.03901e+07	5.14791e+07	3.26348e+07	2.70116e+06	8.36425e+07	1.082e+07	7.2707e+07
DG(38:2p)pH	DG	20561.8	22027.7	493673	53987.9	40191.2	4.21572e+07	32726.5	0	1.3381e+06
DG(38:2p)pH	DG	2.62401e+08	3.10861e+08	3.04942e+08	1.9779e+08	1.76684e+08	1.95493e+08	1.65688e+08	1.47233e+08	1.71254e+08
DG(38:2p)pH	DG	3.99475e+07	3.95938e+07	2.47739e+07	1.5615e+07	6.12907e+06	122537	4.83658e+07	3.09409e+07	3.07576e+07
DG(18:1/20:2)pNH4	DG	9.66586e+07	4.5157e+07	1.23102e+08	6.43221e+07	7.52061e+07	7.12816e+07	1.78079e+08	1.60862e+08	1.84577e+08
DG(38:3p)pH	DG	1.37916e+08	1.42379e+08	8.58774e+07	1.64079e+08	1.36384e+08	8.20301e+06	8.05254e+06	5.93366e+07	1.48857e+08
DG(38:3p)pH	DG	0	585374	366502	677159	832912	9.20886e+07	32617.6	4884.57	0
DG(18:1/20:3)pNH4	DG	3.49989e+07	6.09737e+07	2.49167e+07	2.80247e+07	7.31708e+07	1.18978e+07	1.18215e+08	4.00006e+07	2.29411e+08
DG(38:4e)pH	DG	2.18592e+08	2.26887e+08	2.47265e+08	1.99479e+08	2.01307e+08	7.40692e+07	2.80448e+08	2.88245e+08	3.44141e+08
DG(38:4p)pH	DG	2.47526e+08	3.08511e+08	2.84674e+08	3.76485e+08	2.24863e+08	8.43875e+07	2.70645e+08	3.14392e+08	2.66984e+08
DG(18:1/20:4)pNH4	DG	7.66891e+07	6.501e+07	7.46182e+07	6.49427e+07	118753	3.80651e+06	1.05849e+08	9.03381e+07	1.02795e+08
DG(38:5p)pNH4	DG	3.4701e+07	8.40316e+06	1.39522e+07	1.46065e+07	2.95472e+07	2.14917e+06	7.12476e+07	7.16329e+07	7.07769e+07
DG(16:0/22:6)pNH4	DG	3.88311e+07	1.26625e+07	2.06322e+07	2.0485e+07	1.42624e+07	0	2.46876e+07	1.77005e+07	3.79219e+07
DG(18:0/21:2)pNH4	DG	1.42363e+07	9.29673e+06	1.64692e+07	1.10297e+07	4.30662e+06	0	1.66268e+07	1.93415e+07	2.73162e+07
DG(16:0/24:0)pNH4	DG	9.0754e+07	9.99172e+07	1.24628e+08	1.12181e+08	1.11415e+08	1.17594e+08	1.98182e+07	2.56597e+07	2.85047e+07
DG(16:0/24:1)pNH4	DG	5.09697e+08	5.24763e+08	6.51667e+08	5.94303e+08	6.05571e+08	6.44959e+08	1.89858e+08	1.82953e+08	2.49712e+08
DG(16:0/24:1)pH	DG	2.15871e+07	2.96225e+07	3.75293e+07	2.48684e+07	4.01472e+07	3.06767e+07	8.35073e+06	8.851e+06	1.5619e+07
DG(40:1e)pNa	DG	1.95904e+08	2.24288e+08	2.64293e+08	1.50811e+08	1.51118e+08	840106	1.2398e+08	1.1595e+08	1.46812e+08
DG(18:1/22:1)pNH4	DG	4.21041e+08	3.65934e+08	4.39569e+08	3.56718e+08	3.89902e+08	4.05185e+08	2.72587e+08	2.58322e+08	2.96079e+08
DG(40:2e)pNa	DG	2.34994e+07	4.12185e+07	944540	2.25272e+07	2.20884e+07	2.71448e+07	2.77223e+07	3.33235e+06	3.7034e+06
DG(40:2p)pH	DG	0	0	0	1.63685e+06	0	1.40367e+07	0	496191	0
DG(40:2p)pH	DG	3.34367e+08	3.96244e+08	4.57878e+08	2.71165e+08	2.77291e+08	2.64141e+08	1.30443e+08	1.07614e+08	1.5861e+08
DG(18:1/22:2)pNH4	DG	3.617e+07	4.47313e+07	5.40249e+07	5.44463e+07	552333	43323.2	4.71252e+07	4.45137e+07	5.01609e+07
DG(18:0/22:4)pNH4	DG	6.91536e+07	3.23532e+07	4.08857e+07	4.90665e+07	6.28731e+07	1.23196e+07	3.26385e+07	7.83237e+07	8.46409e+07
DG(40:4e)pH	DG	49536.7	6.85328e+06	1.42809e+06	1.62002e+07	3.66596e+07	31492.3	2.09046e+07	2.40787e+07	3.20802e+07
DG(18:1/22:4)pNH4	DG	4.86567e+07	8.46645e+06	1.32751e+07	1.29924e+07	2.38556e+07	1.04424e+07	3.99419e+07	4.47457e+07	5.84042e+07
DG(40:5p)pNH4	DG	2.20966e+07	1.24554e+07	6.27077e+06	1.56322e+07	92549	1.29943e+06	4.93849e+07	3.83676e+07	5.74093e+07
DG(16:0/24:6)pNH4	DG	7.18219e+06	2.83567e+07	8.28674e+06	4.98457e+06	3.38058e+06	0	1.77211e+06	1.62574e+06	2.61492e+06
DG(18:1/22:5)pNH4	DG	2.07145e+07	9.20853e+06	8.57076e+06	1.21595e+07	135494	1.03876e+07	5.23608e+07	4.42854e+07	5.81292e+07
DG(18:1/22:6)pNH4	DG	1.46101e+06	2.33812e+06	2.25394e+07	2.03798e+07	1.57097e+07	0	3.46844e+07	1.88002e+07	4.37039e+07
DG(25:1/16:0)pNH4	DG	2.88026e+07	2.49402e+07	4.45715e+07	2.76824e+07	3.71386e+07	690501	9.77829e+06	8.25267e+06	1.16413e+07
DG(26:0/16:0)pNH4	DG	4.05093e+07	4.79353e+07	3.97903e+07	4.84741e+07	5.25596e+07	4.05106e+07	2.82464e+06	4.61991e+06	5.44976e+06
DG(26:1/16:0)pNH4	DG	4.41762e+08	4.45817e+08	5.534e+08	4.92576e+08	5.10941e+08	4.06851e+08	1.16118e+08	1.00675e+08	1.48321e+08
DG(26:1/16:0)pH	DG	1.65402e+07	1.88806e+07	3.61019e+07	1.80128e+07	2.14356e+07	1.64028e+07	1.38845e+06	2.47044e+06	3.48362e+06
DG(42:10)pNa	DG	3.19994e+07	3.6012e+07	2.45849e+07	3.07456e+06	543806	1832.22	416131	4.33102e+06	4.13616e+06
DG(18:1/24:1)pNH4	DG	4.61449e+08	5.00664e+08	6.19044e+08	4.92382e+08	5.35434e+08	5.3618e+08	2.61104e+08	2.45649e+08	3.29337e+08
DG(18:1/24:2)pNH4	DG	1.1191e+08	1.10455e+08	1.35679e+08	8.32608e+07	171438	1.09102e+08	7.20098e+07	7.01881e+07	8.66256e+07
DG(24:5/18:0)pNH4	DG	3.62917e+07	1.61187e+07	2.81683e+07	2.12621e+07	4.43738e+06	0	4.08737e+07	3.26344e+07	4.5332e+07
DG(28:1/16:0)pNH4	DG	4.22078e+07	5.07876e+07	5.37885e+07	4.96098e+07	5.26917e+07	4.46571e+07	1.71479e+07	2.36234e+07	1.8397e+07
DG(26:1/18:1)pNH4	DG	2.24401e+08	2.16899e+08	2.82631e+08	2.38696e+08	2.16255e+08	1.8761e+08	9.22105e+07	7.80029e+07	1.25418e+08
DG(26:2/18:1)pNH4	DG	8.29759e+07	1.1225e+08	1.24001e+08	8.13499e+07	351250	9.18193e+07	5.30131e+07	5.21248e+07	7.49395e+07
DG(26:2/20:1)pNH4	DG	1.63497e+06	3.89164e+06	5.68977e+06	2.08091e+06	659280	1.32988e+06	5.08782e+06	5.84932e+06	1.24913e+07
DG(47:5)pNa	DG	7.69232e+07	6.13854e+07	9.54554e+07	4.95477e+07	3.55994e+07	223878	1.07733e+06	5.18655e+07	6.91144e+07
DG(47:6)pH	DG	9.70331e+07	1.43511e+08	1.39637e+08	1.17655e+08	412659	0	8.40989e+07	1.0291e+08	9.96337e+07
DG(49:2)pH	DG	0	0	0	0	0	100668	0	0	0
DG(50:1)pNa	DG	2.43495e+06	3.77732e+06	880062	5.32039e+06	4.16751e+07	814649	1.63938e+07	697328	716071
DG(52:2)pNa	DG	0	1450.89	0	12598.5	3.15903e+06	6.94215e+06	7.58528e+06	0	333514
DG(52:6)pNa	DG	0	0	0	0	0	0	0	0	1.02448e+06
DG(53:1)pNH4	DG	2.57412e+07	4.97242e+06	4.9782e+06	1.2525e+07	2.88859e+07	6.00488e+06	4.42009e+07	4.40737e+07	1.96209e+06
DG(53:2)pNH4	DG	23761.5	594625	1.91506e+06	956591	0	10406.1	6.67548e+06	1.78545e+07	2.66367e+07
DG(54:1)pNH4	DG	3.52228e+07	2.42067e+07	0	1.80272e+07	597014	0	6.74793e+07	7.58964e+07	335379
DG(54:3)pNH4	DG	8.16982e+06	1.11372e+07	5.80058e+06	9.72044e+06	5.16718e+06	8.68075e+06	8.43028e+07	9.54126e+07	7.21062e+07
DG(54:5)pNH4	DG	84683.8	6.62628e+06	9.87974e+06	8.3161e+06	7.79479e+06	9.25442e+06	4.88195e+07	4.53297e+07	7.8697e+07
GM2(d34:1)nH	GM2	6.19392e+06	4.63005e+06	8.72019e+06	7.55643e+06	4.77148e+06	0	1.57359e+06	6.25384e+06	8.54884e+06
LPA(18:1)nH	LPA	1.4125e+06	2.73185e+06	1.22494e+06	3.93354e+06	3.15643e+06	47579.2	9.02581e+06	7.66319e+06	9.95465e+06
LPC(12:0)pH	LPC	6.95905e+06	8.10907e+06	7.43406e+06	3.02633e+06	2.77716e+06	2847.42	5680.36	3711.58	551439
LPC(13:1)pH	LPC	1.48081e+08	1.90249e+08	1.49007e+08	7.25694e+07	4.86855e+07	1.86406e+07	3.24597e+07	3.15179e+07	3.72873e+07
LPC(13:1)pHCOO	LPC	1.50551e+06	2.73348e+06	202242	1978.38	9091.77	0	400408	421036	137850
LPC(13:1)pH	LPC	6.00316e+06	7.37237e+06	5.69201e+06	3.29743e+06	3.25762e+06	6.09168e+07	2.47982e+06	107263	777022
LPC(14:0)pHCOO	LPC	2.61013e+07	3.93484e+07	3.16358e+07	1.53781e+07	1.12424e+07	387995	8.28264e+06	6.50019e+06	8.93705e+06
LPC(14:0)pH	LPC	2.32523e+08	3.42721e+08	2.82286e+08	1.54099e+08	9.94457e+07	5.54481e+06	8.50388e+07	6.74892e+07	1.31979e+08
LPC(14:0)pNa	LPC	3.88332e+06	7.90265e+06	3.83898e+06	2.17246e+06	1.47931e+06	386858	518764	511332	6.99904e+06
LPC(14:0)pHCOO	LPC	6.83437e+07	1.23232e+08	9.27785e+07	4.36501e+07	3.27818e+07	1.28706e+07	2.27844e+07	1.97639e+07	2.82819e+07
LPC(14:0)pH	LPC	6.27701e+08	1.14661e+09	7.72261e+08	4.4415e+08	3.37464e+08	1.12226e+08	2.34079e+08	2.006e+08	2.91724e+08
LPC(14:0)pNa	LPC	1.66391e+07	2.54017e+07	1.86049e+07	7.95868e+06	7.41557e+06	1.38434e+06	4.43246e+06	3.02861e+06	6.16801e+06
LPC(14:0)pH	LPC	1.30144e+08	1.44807e+08	7.82126e+07	5.77065e+07	9.99773e+07	4.23092e+08	5.5938e+07	1.99411e+07	1.74265e+07
LPC(14:0)pHCOO	LPC	1.02203e+07	1.09578e+07	5.95968e+06	6.4727e+06	7.60923e+06	4.1669e+07	4.56255e+06	1.45697e+06	1.76346e+06
LPC(14:0)pNa	LPC	335.237	1567.45	942.339	83903.4	2059.64	8.46964e+06	59829.9	138862	39975.4
LPC(14:0e)pNa	LPC	2.90516e+06	7.03194e+06	4.3757e+06	1.75425e+06	780166	25780.7	302257	451697	1.23253e+06
LPC(14:0e)pH	LPC	3.19807e+06	6.16353e+06	5.94641e+06	4.65431e+06	4.34249e+06	40036.2	6.22399e+06	3.38296e+06	5.59665e+06
LPC(14:1)pH	LPC	1.51418e+07	6.08634e+06	5.68285e+06	2.67705e+06	1.03974e+06	16559	188528	231397	72593.1
LPC(14:1)pH	LPC	1.71936e+07	2.47713e+07	1.7892e+07	9.47472e+06	6.15019e+06	1.58896e+06	5.02121e+06	5.1452e+06	4.60185e+06
LPC(14:1)pH	LPC	0	0	0	107212	1476.4	8.60809e+06	2339.16	510286	1642.39
LPC(15:0)pH	LPC	2.85066e+07	3.94269e+07	2.2772e+07	1.45255e+07	1.11507e+07	856025	1.35479e+07	9.77327e+06	1.59558e+07
LPC(15:0)pHCOO	LPC	4.76975e+06	8.71685e+06	5.71887e+06	3.56944e+06	2.26575e+06	328752	1.79883e+06	1.90068e+06	2.80115e+06
LPC(15:0)pH	LPC	6.17969e+07	9.43439e+07	7.62225e+07	3.98778e+07	3.31615e+07	9.86983e+06	2.69215e+07	2.39589e+07	3.58419e+07
LPC(15:0)pH	LPC	46497.4	87413.8	135365	0	0	3.76434e+07	0	69235.2	0
LPC(15:1)pH	LPC	1.53846e+09	2.19257e+09	1.86428e+09	9.4905e+08	7.76608e+08	2.68964e+08	4.44802e+08	3.64952e+08	4.33933e+08
LPC(15:1)pH	LPC	2.75995e+07	4.05993e+07	3.29171e+07	1.80944e+07	2.00096e+07	8.70256e+08	1.16716e+07	5.70254e+06	5.55015e+06
LPC(15:2)pH	LPC	4.29804e+07	6.20317e+07	5.08263e+07	1.9503e+07	1.56797e+07	3.03743e+06	1.49107e+07	1.21777e+07	1.60351e+07
LPC(15:2)pH	LPC	3.1112e+07	4.20895e+07	3.82645e+07	1.83052e+07	1.26644e+07	6.96711e+06	9.01115e+06	9.04684e+06	9.60606e+06
LPC(15:2)pH	LPC	179765	552798	113920	192787	182476	1.99409e+07	105752	94653.4	67422.3
LPC(16:0)pNa	LPC	3.79843e+07	5.51189e+07	4.20125e+07	1.56854e+07	1.69667e+07	0	9.78919e+06	6.18448e+06	1.24835e+07
LPC(16:0)pHCOO	LPC	6.99764e+08	1.00965e+09	7.75081e+08	4.98849e+08	4.53506e+08	1.04578e+08	2.74921e+08	2.29079e+08	3.56277e+08
LPC(16:0)pH	LPC	6.94082e+09	9.96517e+09	8.33899e+09	4.57262e+09	4.7001e+09	1.40797e+06	2.92751e+09	2.16046e+09	3.52031e+09
LPC(16:0)pNa	LPC	3.47949e+08	4.83282e+08	4.46867e+08	2.07769e+08	2.33337e+08	1.42482e+07	1.21215e+08	7.82133e+07	1.76826e+08
LPC(16:0)pHCOO	LPC	301770	935254	1.47411e+06	1.57299e+06	964796	5.42931e+08	140238	68012.9	362301
LPC(16:0)pH	LPC	1.35884e+07	5.70729e+06	1.13947e+07	1.4516e+07	1.78748e+07	5.6095e+09	6.33609e+06	4.16021e+06	1.31597e+06
LPC(16:0)pNa	LPC	467124	273278	946608	234412	970630	2.89823e+08	154587	33007.1	105366
LPC(16:0e)pHCOO	LPC	2.03664e+07	2.63723e+07	3.25122e+07	2.07869e+07	1.86998e+07	0	2.04631e+07	1.7378e+07	2.15459e+07
LPC(16:0e)pH	LPC	2.33737e+08	2.61202e+08	3.00117e+08	2.08017e+08	2.0189e+08	12241.6	1.99803e+08	1.61713e+08	2.10862e+08
LPC(16:0e)pH	LPC	91233.7	167539	111068	675328	1.07894e+06	2.11153e+08	65054.8	68167.8	74391.6
LPC(16:0e)pHCOO	LPC	4622.2	250.396	305.083	0	686.261	2.19804e+07	9409.23	0	16880.8
LPC(16:0p)pHCOO	LPC	3.44719e+07	3.96176e+07	4.80215e+07	3.28148e+07	3.05196e+07	120177	2.48911e+07	2.3565e+07	2.9748e+07
LPC(16:0p)pH	LPC	3.67383e+08	4.22336e+08	4.96397e+08	3.43994e+08	3.22051e+08	5.08059e+06	2.56286e+08	2.17869e+08	2.81147e+08
LPC(16:0p)pHCOO	LPC	16225.4	16305.3	9070.32	21751.7	17453.1	3.43821e+07	18047.8	0	11546.8
LPC(16:0p)pH	LPC	355933	274043	340053	148499	191707	3.35666e+08	117243	134154	330933
LPC(16:1)pHCOO	LPC	5.26446e+07	8.38785e+07	6.87414e+07	3.18479e+07	2.11386e+07	0	2.20242e+07	1.67646e+07	2.54911e+07
LPC(16:1)pH	LPC	4.37802e+08	7.27781e+08	5.57722e+08	3.01526e+08	1.93299e+08	138797	2.09858e+08	1.83363e+08	2.39551e+08
LPC(16:1)pNa	LPC	9.51945e+06	1.53535e+07	1.14869e+07	5.45433e+06	4.28854e+06	55630.7	3.82539e+06	6.11041e+06	4.7604e+06
LPC(16:1)pHCOO	LPC	1.32569e+08	2.25472e+08	1.52992e+08	7.20472e+07	5.81984e+07	2.61745e+07	4.40541e+07	3.68862e+07	5.44784e+07
LPC(16:1)pH	LPC	1.2899e+09	2.16325e+09	1.36202e+09	7.17076e+08	5.57913e+08	2.26773e+08	4.44728e+08	3.53589e+08	5.63502e+08
LPC(16:1)pNa	LPC	3.20189e+07	5.25977e+07	3.13834e+07	1.27619e+07	1.22428e+07	3.99402e+06	8.68748e+06	6.15599e+06	1.10957e+07
LPC(16:1)pHCOO	LPC	1.58516e+07	1.91879e+07	8.17734e+06	8.17285e+06	7.79546e+06	6.98952e+07	8.20632e+06	3.04999e+06	4.42135e+06
LPC(16:1)pH	LPC	1.84097e+08	2.08422e+08	1.01814e+08	6.71204e+07	9.00535e+07	6.34575e+08	7.62201e+07	3.02638e+07	3.50998e+07
LPC(16:1p)pH	LPC	6.97519e+06	1.08081e+07	4.12064e+06	1.37535e+06	3.14864e+06	5.09349e+06	3.41814e+06	1.91311e+06	2.56747e+06
LPC(16:1p)pH	LPC	1.81306e+07	2.79627e+07	2.71751e+06	1.01153e+07	8.07491e+06	3.36629e+06	5.52568e+06	2.58837e+06	8.42798e+06
LPC(16:2)pH	LPC	7.02308e+06	6.72685e+06	1.17731e+07	2.45088e+06	4.33008e+06	869709	5.24637e+06	1.17262e+06	5.30488e+06
LPC(17:0)pHCOO	LPC	8.23584e+06	9.64338e+06	1.14184e+07	7.35828e+06	7.98589e+06	122152	4.50662e+06	3.7381e+06	6.09782e+06
LPC(17:0)pH	LPC	8.03061e+07	1.04574e+08	1.14189e+08	7.75841e+07	4.78127e+07	6.75723e+06	3.86068e+07	4.08934e+07	4.51893e+07
LPC(17:0)pHCOO	LPC	9.74853e+06	1.43897e+07	1.23357e+07	9.61998e+06	9.18301e+06	187944	6.35386e+06	5.47818e+06	6.13957e+06
LPC(17:0)pH	LPC	2.99833e+07	2.67364e+07	1.34164e+07	2.2894e+07	4.36351e+07	7.78119e+07	2.18417e+07	7.14657e+06	1.31178e+06
LPC(17:0)pNa	LPC	2.41622e+06	3.96673e+06	4.30659e+06	1.88004e+06	1.71931e+06	2.05268e+06	1.27801e+06	431991	1.7325e+06
LPC(17:0)pHCOO	LPC	32037	38915.5	10298.6	38543.7	172635	8.89772e+06	48829.8	0	0
LPC(17:1)pHCOO	LPC	1.04077e+07	1.76319e+07	1.54726e+07	5.84047e+06	4.5595e+06	1.8395e+06	4.99263e+06	4.75379e+06	5.86017e+06
LPC(17:1)pH	LPC	9.06022e+07	1.38906e+08	9.90123e+07	5.20511e+07	4.75361e+07	1.44379e+07	3.98241e+07	3.42042e+07	5.44518e+07
LPC(17:1)pH	LPC	1.67404e+06	611271	1.45422e+06	178608	889756	5.28499e+07	1.46733e+06	798134	99448.6
LPC(17:1)pHCOO	LPC	37794.3	40739.7	11277.5	53138.4	15071.2	5.76344e+06	76412.4	27278.7	32828
LPC(17:2)pH	LPC	7.63374e+06	1.40722e+07	1.17668e+07	8.30224e+06	4.3977e+06	1.17939e+06	2.42659e+06	2.67131e+06	3.80972e+06
LPC(17:3)pNa	LPC	4.20146e+07	5.09436e+07	5.18838e+07	3.99824e+07	2.22071e+07	79666	2.26754e+07	2.93112e+07	2.52892e+07
LPC(17:3)pNa	LPC	104237	880288	386795	792603	155128	6.91119e+07	193338	1.43978e+06	277668
LPC(17:3)pH	LPC	2.93862e+07	5.072e+07	3.74133e+07	1.31896e+07	1.50329e+07	68325.9	8.99977e+06	1.45425e+07	2.04324e+07
LPC(17:3)pH	LPC	8.50067e+06	77895	21941.5	4.94796e+06	2.31801e+06	2.43877e+07	2.57581e+06	3.31866e+06	24742.8
LPC(18:0)pHCOO	LPC	5.41453e+07	6.75247e+07	7.01713e+07	4.64511e+07	3.52452e+07	60140	3.33988e+07	2.39159e+07	3.10287e+07
LPC(18:0)pNa	LPC	1.23823e+07	1.41526e+07	1.30727e+07	6.13352e+06	7.21686e+06	117162	6.04233e+06	2.87106e+06	7.00064e+06
LPC(18:0)pHCOO	LPC	2.87393e+08	3.32076e+08	3.89889e+08	2.91795e+08	2.81717e+08	2.72997e+07	1.69363e+08	1.40746e+08	1.97863e+08
LPC(18:0)pH	LPC	2.66313e+09	3.04146e+09	3.35322e+09	2.64396e+09	2.52051e+09	2.05997e+06	1.65104e+09	1.56648e+09	1.73287e+09
LPC(18:0)pNa	LPC	1.48466e+08	2.01122e+08	2.35976e+08	8.82947e+07	1.36032e+08	5.70841e+06	7.7185e+07	3.38065e+07	8.60765e+07
LPC(18:0)pHCOO	LPC	452.374	99056.2	55554.9	51958.9	92210.7	2.83866e+08	152028	2693.53	0
LPC(18:0)pH	LPC	2.9595e+09	3.7548e+09	4.0401e+09	3.14352e+09	2.78762e+09	2.92199e+09	1.91692e+09	1.61633e+09	1.91924e+09
LPC(18:0e)pH	LPC	1.47284e+08	1.37775e+08	1.39621e+08	1.32189e+08	1.48808e+08	1.00037e+06	1.5986e+08	1.2212e+08	1.12209e+08
LPC(18:0e)pHCOO	LPC	4.6143e+06	6.71729e+06	5.9498e+06	4.69232e+06	4.87176e+06	0	5.2902e+06	2.90852e+06	6.10375e+06
LPC(18:0e)pH	LPC	0	180840	0	69590.2	499872	1.25077e+08	289972	0	0
LPC(18:0e)pHCOO	LPC	0	0	0	0	0	3.7052e+06	0	0	0
LPC(18:0p)pH	LPC	1.55643e+08	1.85451e+08	1.98333e+08	1.3283e+08	1.27151e+08	53717.4	2.14483e+08	1.72531e+08	2.14355e+08
LPC(18:0p)pHCOO	LPC	1.52153e+07	1.89349e+07	1.94092e+07	1.47458e+07	1.36881e+07	0	2.04383e+07	1.70268e+07	2.13268e+07
LPC(18:0p)pNa	LPC	2.3667e+06	3.05437e+06	4.38205e+06	1.95301e+06	1.58431e+06	0	2.73631e+06	2.48694e+06	4.67612e+06
LPC(18:0p)pH	LPC	78586.4	69921.4	561296	738199	1.7926e+06	1.40191e+08	633992	828963	68973.4
LPC(18:0p)pHCOO	LPC	1.89556e+07	1.92842e+07	2.51534e+07	1.65961e+07	1.92067e+07	0	1.20487e+07	9.70629e+06	1.24111e+07
LPC(18:0p)pH	LPC	5.18678e+08	6.28876e+08	6.27084e+08	5.35427e+08	5.75586e+08	64896.2	3.15059e+08	2.57366e+08	2.91838e+08
LPC(18:0p)pNa	LPC	1.86877e+06	3.3048e+06	2.82249e+06	390758	3.41558e+06	0	930682	4960.6	124033
LPC(18:0p)pHCOO	LPC	0	0	0	0	29427.9	1.95284e+07	18618.8	0	0
LPC(18:0p)pNa	LPC	0	0	0	0	0	3.10044e+06	0	0	0
LPC(18:1)pNa	LPC	1.08538e+08	1.2048e+08	1.1516e+08	3.73924e+07	4.24381e+07	1.01197e+06	4.06383e+07	2.97163e+07	4.81593e+07
LPC(18:1)pHCOO	LPC	7.77155e+08	1.15086e+09	8.18428e+08	4.50116e+08	4.0641e+08	1.18096e+08	3.29049e+08	2.61041e+08	4.345e+08
LPC(18:1)pH	LPC	7.56212e+09	1.18385e+10	8.93606e+09	4.39492e+09	3.8997e+09	1.14704e+09	3.29707e+09	2.51395e+09	3.58582e+09
LPC(18:1)pNa	LPC	3.26218e+08	3.93683e+08	2.24908e+08	1.65341e+08	2.02339e+08	4.31496e+07	1.35048e+08	5.25532e+07	9.88126e+07
LPC(18:1)pHCOO	LPC	8.21726e+06	7.86644e+06	2.3287e+06	6.30392e+06	8.45475e+06	4.7975e+08	4.81488e+06	370041	2.70858e+06
LPC(18:1)pH	LPC	1.67055e+08	1.91664e+08	1.5116e+08	9.23812e+07	6.56135e+07	4.60825e+09	4.23618e+07	5.02888e+07	6.89157e+07
LPC(18:1p)pHCOO	LPC	1.30508e+07	1.45476e+07	1.27059e+07	1.36523e+07	8.97967e+06	1.91739e+06	9.38739e+06	8.70938e+06	9.24622e+06
LPC(18:1p)pH	LPC	1.33425e+08	1.5378e+08	1.69067e+08	1.28032e+08	1.27116e+08	5.5226e+07	9.99748e+07	6.49282e+07	1.07714e+08
LPC(18:1p)pHCOO	LPC	165059	67085.3	88092.2	139012	204890	1.00876e+07	26501.2	38467.9	328185
LPC(18:1p)pH	LPC	3.46768e+06	4.7899e+06	3.90696e+06	2.9111e+06	5.33332e+06	1.27155e+08	1.12494e+06	2.35396e+06	4.61031e+06
LPC(18:2)pHCOO	LPC	3.26257e+07	4.14832e+07	2.54403e+07	1.61211e+07	1.02245e+07	4.33708e+06	1.40807e+07	1.19169e+07	1.91676e+07
LPC(18:2)pH	LPC	2.30136e+08	3.82616e+08	2.62964e+08	1.32086e+08	1.07192e+08	9.7707e+07	1.49408e+08	1.21631e+08	1.94637e+08
LPC(18:2)pH	LPC	1.85254e+07	2.00995e+07	4.84803e+06	2.45949e+06	4.61108e+06	1.12818e+08	8.0408e+06	834728	4.67834e+06
LPC(18:2)pHCOO	LPC	6.11732e+06	7.00407e+06	5.71222e+06	3.66515e+06	3.75513e+06	1.23612e+07	2.73507e+06	1.64981e+06	2.14751e+06
LPC(18:2p)pH	LPC	6.78631e+06	1.15806e+06	2.9403e+07	514696	3.38216e+06	38365.4	2.02212e+06	1.11655e+06	1.12775e+06
LPC(18:2p)pH	LPC	6.19768e+06	1.44295e+06	1.4539e+06	595322	4.66973e+06	354796	8.43662e+06	257697	1.05816e+06
LPC(18:2p)pH	LPC	3.66974e+06	3.58801e+06	1.27605e+06	464460	3.12032e+06	2.10874e+06	3.01971e+06	172866	2.05879e+06
LPC(18:3)pH	LPC	1.08097e+07	1.2791e+07	9.94438e+06	5.61897e+06	2.80017e+06	633214	8.00656e+06	3.21074e+06	5.51145e+06
LPC(18:3)pH	LPC	2.01023e+06	7.62101e+06	90389.4	846671	1.176e+06	3.38239e+06	1.91462e+06	480021	2.56212e+06
LPC(18:3)pH	LPC	3.07895e+08	3.75335e+08	2.90811e+08	1.61434e+08	2.33337e+08	1.22042e+07	9.27449e+07	5.62015e+07	1.15763e+08
LPC(19:0)pHCOO	LPC	1.94839e+06	2.04172e+06	2.95236e+06	1.77999e+06	36301	0	1.47789e+06	816120	1.18046e+06
LPC(19:0)pH	LPC	7.62604e+07	5.74888e+07	8.19473e+07	5.40815e+07	6.71737e+07	1.55893e+07	5.52036e+07	3.65072e+07	4.93997e+07
LPC(19:0)pHCOO	LPC	741068	540002	822849	265910	2.42036e+06	893.149	1.79705e+06	567626	480387
LPC(19:0)pH	LPC	153316	1330.7	56870.2	0	0	4.90578e+07	0	0	0
LPC(19:0)pHCOO	LPC	0	0	0	0	0	3.22386e+06	0	0	0
LPC(19:1)pHCOO	LPC	6.41318e+06	9.73209e+06	9.0047e+06	6.8928e+06	5.1797e+06	16685.4	4.54215e+06	3.41473e+06	2.68975e+06
LPC(19:1)pH	LPC	6.71459e+07	1.03188e+08	8.086e+07	5.33309e+07	4.28567e+07	8.14059e+06	4.32526e+07	3.59078e+07	4.50751e+07
LPC(19:1)pHCOO	LPC	210.87	16562.2	0	30734.7	17850	6.44196e+06	14480.9	0	0
LPC(19:1)pH	LPC	97477.2	92101.5	377292	78306	1698.65	4.67347e+07	173345	1019.31	59643.4
LPC(19:2)pH	LPC	6.12766e+06	1.02329e+07	2.63586e+06	3.64311e+06	2.37628e+06	104162	3.22079e+06	1.91652e+06	1.40463e+06
LPC(19:2)pH	LPC	1.15539e+07	8.25219e+06	9.93058e+06	6.74834e+06	7.4227e+06	284414	7.42977e+06	3.88658e+06	7.36149e+06
LPC(19:3)pH	LPC	4.23743e+06	7.88414e+06	5.33801e+06	4.64762e+06	3.04711e+06	1.59821e+06	4.53673e+06	5.38285e+06	4.14623e+06
LPC(19:3)pH	LPC	0	117719	0	151758	219669	5.7848e+06	50432.7	51417.8	0
LPC(19:5)pH	LPC	9.18913e+07	1.25738e+08	1.0146e+08	7.36542e+07	4.43884e+07	1.05762e+06	6.09434e+07	7.74555e+07	6.77886e+07
LPC(19:5)pH	LPC	1.15916e+07	2.00453e+07	1.4263e+07	1.01481e+07	5.53284e+06	6.96587e+07	7.75521e+06	9.47534e+06	7.8251e+06
LPC(20:0)pHCOO	LPC	1.10273e+07	1.12783e+07	1.32796e+07	1.01553e+07	1.12473e+07	0	6.1473e+06	1.16799e+06	5.01051e+06
LPC(20:0)pH	LPC	3.84205e+07	3.39042e+06	1.52465e+08	1.73736e+08	2.76964e+07	616698	6.60636e+07	384428	2.49427e+07
LPC(20:0)pHCOO	LPC	0	0	0	0	6999.3	6.97748e+06	0	0	0
LPC(20:0)pH	LPC	579519	582243	627941	1.04247e+06	2.57776e+06	1.99532e+08	622309	80530.4	48233.6
LPC(20:0e)pH	LPC	8.24214e+07	3.85982e+07	1.10675e+08	8.37936e+07	7.15944e+07	185758	5.73906e+07	2.07005e+07	6.35047e+07
LPC(20:0e)pHCOO	LPC	4.49975e+06	1.53586e+06	6.82532e+06	4.84175e+06	4.60539e+06	0	3.77029e+06	942937	3.83031e+06
LPC(20:0e)pH	LPC	0	133661	226262	1778.25	104215	9.13426e+07	50899.5	159791	0
LPC(20:0e)pHCOO	LPC	0	0	0	0	0	3.25803e+06	307.159	0	0
LPC(20:0p)pHCOO	LPC	7.24176e+06	9.19477e+06	1.02509e+07	8.08473e+06	8.01398e+06	0	4.27498e+06	1.30488e+06	4.56426e+06
LPC(20:0p)pH	LPC	1.16122e+08	1.55657e+08	2.0104e+08	1.90288e+08	9.0552e+07	74676	7.46532e+07	2.64538e+07	7.90037e+07
LPC(20:0p)pNa	LPC	3.22628e+06	4.54513e+06	7.07398e+06	6.40405e+06	3.56445e+06	0	1.88371e+06	1.39117e+06	4.14864e+06
LPC(20:0p)pHCOO	LPC	0	0	0	0	0	7.69642e+06	0	0	0
LPC(20:0p)pH	LPC	507131	164582	257640	1.36529e+06	710113	1.89806e+08	128111	152120	208592
LPC(20:0p)pNa	LPC	0	38472.5	0	0	0	7.73331e+06	0	0	0
LPC(20:1)pHCOO	LPC	5.87377e+07	8.04313e+07	7.40319e+07	5.62323e+07	4.53597e+07	39148.1	3.10942e+07	2.30262e+07	3.14275e+07
LPC(20:1)pH	LPC	5.70877e+08	7.48634e+08	7.16014e+08	5.58951e+08	4.7859e+08	5.31984e+07	2.74179e+08	2.06983e+08	2.79328e+08
LPC(20:1)pNa	LPC	3.5696e+07	4.85932e+07	5.51983e+07	2.9634e+07	2.06761e+07	912502	1.30862e+07	1.02305e+07	1.51607e+07
LPC(20:1)pHCOO	LPC	1.80782e+06	1.73876e+06	1.30005e+06	786866	2.28547e+06	4.52618e+07	1.47769e+06	387438	407978
LPC(20:1)pH	LPC	876456	1.74449e+07	1.13694e+07	1.04516e+07	1.79893e+07	4.71062e+08	1.26028e+07	4.53792e+06	4.42932e+06
LPC(20:1)pNa	LPC	0	0	0	0	0	3.58808e+07	0	506.215	0
LPC(20:1p)pH	LPC	1.0296e+07	1.08283e+07	1.64474e+07	7.79922e+06	1.15027e+07	378654	5.10548e+06	6.62495e+06	9.27168e+06
LPC(20:2)pHCOO	LPC	6.63955e+06	8.91478e+06	7.53009e+06	3.82823e+06	3.03e+06	48157.8	2.9782e+06	2.61627e+06	3.16475e+06
LPC(20:2)pH	LPC	5.75709e+07	9.2454e+07	7.18151e+07	4.15161e+07	3.38405e+07	3.77367e+06	2.73989e+07	2.19585e+07	3.21115e+07
LPC(20:2)pH	LPC	3.50128e+07	5.55561e+07	4.11382e+07	2.96755e+07	2.0391e+07	7.88199e+06	1.33861e+07	1.32167e+07	1.80129e+07
LPC(20:2)pHCOO	LPC	11853.6	21125.7	38642.3	18338	20984.4	3.06693e+06	18615.1	11614.9	20025.3
LPC(20:3)pHCOO	LPC	8.18977e+06	1.24919e+07	1.10327e+07	4.86724e+06	3.86983e+06	685485	4.77574e+06	3.96136e+06	5.63743e+06
LPC(20:3)pH	LPC	7.94204e+07	1.24108e+08	8.43719e+07	4.18178e+07	3.6515e+07	1.30364e+07	4.53785e+07	3.8577e+07	5.18218e+07
LPC(20:3)pH	LPC	1.72937e+07	2.54552e+07	2.88976e+06	1.02276e+07	7.18403e+06	4.02285e+07	6.21357e+06	5.80955e+06	446233
LPC(20:3)pHCOO	LPC	104729	831626	335135	18723.1	439525	5.84229e+06	349672	139024	157350
LPC(20:4)pHCOO	LPC	2.76733e+07	5.37227e+07	3.2238e+07	1.62752e+07	1.09585e+07	5.15189e+06	2.11614e+07	1.95043e+07	2.72456e+07
LPC(20:4)pH	LPC	2.6682e+08	4.70704e+08	3.06545e+08	1.61505e+08	1.15109e+08	5.0917e+07	2.13765e+08	2.04829e+08	2.73563e+08
LPC(20:4)pNa	LPC	7.55174e+06	9.72434e+06	6.58334e+06	4.4783e+06	2.45599e+06	8.62615e+06	4.38838e+06	5.3413e+06	6.35226e+06
LPC(20:4)pH	LPC	5.74071e+06	8.14891e+06	4.06245e+06	2.50849e+06	4.28964e+06	1.46475e+08	6.21872e+06	3.13809e+06	3.37062e+06
LPC(20:4)pHCOO	LPC	526757	152235	473950	298851	380329	1.40887e+07	698683	280196	53824.2
LPC(20:4)pNa	LPC	119330	205722	274140	763930	99157.5	7.09345e+06	383442	1.23805e+06	150918
LPC(20:5)pHCOO	LPC	1.94956e+06	3.16899e+06	2.35722e+06	1.20578e+06	310402	220217	1.42634e+06	1.60497e+06	1.9044e+06
LPC(21:1)pH	LPC	2.33587e+07	2.19394e+07	2.50092e+07	1.55828e+07	116001	1557.91	94597.1	8.79832e+06	1.39043e+07
LPC(22:0)pH	LPC	1.89636e+07	3.23282e+07	5.16337e+07	4.82646e+07	2.305e+07	356217	1.84324e+07	2.09145e+07	1.93142e+07
LPC(22:0)pHCOO	LPC	1.30452e+06	2.54158e+06	4.17705e+06	2.4003e+06	1.71561e+06	173.065	1.01253e+06	487906	2.2737e+06
LPC(22:0)pH	LPC	1.34981e+06	2.91928e+06	2.93052e+06	4.25716e+06	2.80442e+06	5.10732e+07	3.23262e+06	1.43981e+06	2.35068e+06
LPC(22:0)pHCOO	LPC	0	0	0	0	0	2.91998e+06	0	0	0
LPC(22:1)pHCOO	LPC	1.14479e+07	1.20011e+07	1.35914e+07	8.60711e+06	1.17543e+07	93701.8	5.36824e+06	1.45461e+06	7.03767e+06
LPC(22:1)pH	LPC	1.20843e+08	1.96892e+08	1.92963e+08	2.13835e+08	1.08353e+08	164012	8.69951e+07	1.04397e+07	9.2921e+07
LPC(22:1)pHCOO	LPC	10515.1	0	0	0	0	8.324e+06	0	0	0
LPC(22:1)pH	LPC	1.99908e+06	2.21621e+06	1.49385e+06	2.23354e+06	5.03023e+06	2.20503e+08	1.95819e+06	198184	301960
LPC(22:2)pH	LPC	1.56794e+07	1.50699e+07	1.68611e+07	9.81743e+06	6.1686e+06	481111	7.23706e+06	6.48276e+06	7.8676e+06
LPC(22:2)pHCOO	LPC	803729	693442	497113	509630	565316	90156.3	704643	446933	1.30091e+06
LPC(22:2)pH	LPC	3.8171e+07	6.73709e+07	5.05846e+07	3.36121e+07	3.00085e+07	3.82458e+06	2.26635e+07	1.74325e+07	2.46314e+07
LPC(22:2)pHCOO	LPC	3.13671e+06	4.2418e+06	110942	2.7301e+06	2.70982e+06	112762	2.02665e+06	1.94867e+06	2.16505e+06
LPC(22:2)pH	LPC	95462.4	60595.6	92124.3	168022	174119	2.54101e+07	50295	49091.5	94205.9
LPC(22:2)pHCOO	LPC	0	0	0	0	730.475	2.44799e+06	0	0	0
LPC(22:3)pH	LPC	9.34608e+06	9.04803e+06	9.34615e+06	5.91119e+06	1.40148e+06	141664	2.66212e+06	3.17859e+06	3.22173e+06
LPC(22:3)pH	LPC	53004.3	191452	135274	40142.2	27483.1	4.9794e+06	37686	0	26016.7
LPC(22:4)pHCOO	LPC	7.16618e+06	1.0115e+07	7.11182e+06	5.68908e+06	4.61617e+06	47254.7	3.80528e+06	3.85363e+06	4.16785e+06
LPC(22:4)pH	LPC	7.66188e+07	1.33734e+08	8.49878e+07	5.03722e+07	4.16124e+07	1.40107e+07	3.59054e+07	3.57923e+07	4.5651e+07
LPC(22:4)pNa	LPC	675072	1.86445e+06	2.94719e+06	1.10701e+06	728.549	0	197638	352915	965273
LPC(22:4)pH	LPC	34451.9	1804.16	0	0	0	6.55094e+07	0	0	0
LPC(22:4)pHCOO	LPC	9486.04	0	14357.3	206.069	630.214	4.42958e+06	226.647	228.978	21458.3
LPC(22:5)pHCOO	LPC	8.96677e+06	1.56037e+07	1.12912e+07	6.70304e+06	5.39313e+06	224518	4.49156e+06	4.44015e+06	5.66023e+06
LPC(22:5)pH	LPC	9.34733e+07	1.71281e+08	1.11365e+08	7.22345e+07	5.63239e+07	1.31073e+06	4.63524e+07	5.23252e+07	6.55865e+07
LPC(22:5)pH	LPC	2.6407e+07	3.20277e+07	2.48041e+07	1.69173e+07	2.23488e+07	6.44422e+07	1.52057e+07	9.95719e+06	1.39812e+07
LPC(22:5)pHCOO	LPC	1.2504e+06	1.76867e+06	1.01554e+06	946754	923772	6.04474e+06	653205	393580	63000.9
LPC(22:6)pHCOO	LPC	1.44294e+07	2.00425e+07	1.50347e+07	8.72928e+06	6.24485e+06	1.78511e+06	6.74449e+06	6.17e+06	7.43541e+06
LPC(22:6)pH	LPC	1.22137e+08	1.89896e+08	1.39519e+08	8.1515e+07	6.76298e+07	1.1194e+06	7.15717e+07	6.23169e+07	8.31969e+07
LPC(22:6)pNa	LPC	2.28734e+06	6.66724e+06	2.35124e+06	712732	33421.3	22119.6	152199	355656	415822
LPC(22:6)pHCOO	LPC	1.04825e+06	1.63954e+06	1.30415e+06	952524	1.1989e+06	7.30605e+06	783946	861165	758315
LPC(22:6)pH	LPC	170021	4.01833e+06	178983	2.11266e+06	2.32344e+06	8.00979e+07	2.5152e+06	2.24453e+06	1.37062e+06
LPC(23:6)pH	LPC	2.25668e+06	6.24422e+06	1.52183e+06	4.98692e+06	391558	562499	2.38046e+06	4.58057e+06	2.66834e+06
LPC(24:0)pHCOO	LPC	2.41289e+06	1.6166e+06	3.43626e+06	1.09687e+06	2.4483e+06	0	2.55888e+06	792770	6.02019e+06
LPC(24:0)pH	LPC	5.63093e+07	7.90817e+07	9.03896e+07	6.23945e+07	7.45173e+07	0	4.8121e+07	2.5603e+07	7.63048e+07
LPC(24:0)pHCOO	LPC	0	0	0	0	0	1.24003e+06	0	0	0
LPC(24:0)pH	LPC	0	0	0	0	0	1.05992e+08	0	0	0
LPC(24:1)pHCOO	LPC	1.06688e+07	1.91524e+07	2.17738e+07	1.95799e+07	1.03401e+07	588745	2.6415e+06	4.93052e+06	9.91959e+06
LPC(24:1)pH	LPC	1.42046e+08	3.10821e+08	3.09453e+08	2.98661e+08	1.41553e+08	9.20704e+06	7.46092e+07	1.26183e+08	1.14792e+08
LPC(24:1)pNa	LPC	2.2649e+06	1.30416e+06	4.88953e+06	6.63641e+06	4.80906e+06	0	701524	1.10312e+06	1.82662e+06
LPC(24:1)pHCOO	LPC	0	0	0	0	14721.5	1.95884e+07	0	0	0
LPC(24:1)pH	LPC	47301.7	1.20276e+06	252889	1.58925e+06	272873	3.57729e+08	147733	65629.5	203989
LPC(24:2)pHCOO	LPC	807756	1.09755e+06	4.53227e+06	454476	496224	0	483751	44466.3	466941
LPC(24:2)pH	LPC	2.12516e+07	2.79204e+07	3.37781e+07	2.06894e+07	1.31223e+07	0	9.26935e+06	61031	1.17059e+07
LPC(24:2)pHCOO	LPC	3.26945e+06	3.85227e+06	233327	3.51705e+06	3.63128e+06	0	2.56165e+06	73993.1	10830.7
LPC(24:2)pH	LPC	8.10342e+07	1.0441e+08	8.9056e+07	9.48742e+07	7.54403e+07	3.46352e+06	3.34331e+07	2.4517e+06	3.36751e+07
LPC(24:2)pNa	LPC	1.22417e+07	1.48518e+07	2.09846e+07	2.32319e+06	9.01079e+06	655355	6.35059e+06	882815	6.82604e+06
LPC(24:2)pH	LPC	211207	21388.3	456206	64314.2	121146	8.87674e+07	62314.1	56793.5	183000
LPC(24:2)pNa	LPC	0	0	0	0	0	9.77556e+06	0	1589.89	59275.7
LPC(24:2)pHCOO	LPC	0	0	0	0	0	3.99864e+06	0	0	0
LPC(24:3)pH	LPC	5.94629e+06	6.05176e+06	1.11491e+07	6.06754e+06	8.12604e+06	84980.4	3.53297e+06	2.38876e+06	4.33323e+06
LPC(24:4)pH	LPC	1.40349e+07	2.31713e+07	2.07658e+07	1.13695e+07	1.06134e+07	112199	9.29102e+06	7.95691e+06	8.94145e+06
LPC(24:4)pH	LPC	0	0	1364.32	0	0	1.13811e+07	673.019	0	0
LPC(24:5)pH	LPC	1.39997e+07	2.82446e+07	2.1152e+07	1.25752e+07	9.31992e+06	195922	7.58859e+06	5.38398e+06	6.99898e+06
LPC(24:5)pHCOO	LPC	1.72538e+06	1.74806e+06	1.47675e+06	954365	869515	0	347169	601866	861644
LPC(24:5)pH	LPC	0	0	0	0	0	1.22451e+07	0	0	0
LPC(24:6)pH	LPC	3.32223e+06	6.14539e+06	4.22129e+06	2.12864e+06	2.12448e+06	80650.8	1.05993e+06	1.60507e+06	1.84473e+06
LPC(26:0)pH	LPC	2.39065e+07	4.60367e+07	6.75741e+07	6.90981e+07	2.18446e+07	0	17144705	1.59744e+07	4.32166e+07
LPC(26:0)pH	LPC	0	0	0	0	0	5.87503e+07	0	0	0
LPC(26:1)pHCOO	LPC	6.37394e+06	4.1338e+06	1.27605e+07	1.07149e+07	164347	448673	4.64759e+06	498160	7.14121e+06
LPC(26:1)pH	LPC	1.74523e+08	2.3411e+08	2.56639e+08	2.14715e+08	1.57699e+08	263934	1.10954e+07	2.09104e+07	1.1583e+08
LPC(26:1)pH	LPC	0	65706.3	0	0	0	2.15044e+08	0	18816.5	0
LPC(26:1)pHCOO	LPC	0	0	0	0	0	98802.7	0	0	0
LPC(26:2)pHCOO	LPC	1.03182e+06	1.8349e+06	1.6421e+06	1.50771e+06	4.16285e+06	0	41021.4	335009	2.8922e+06
LPC(26:2)pH	LPC	1.82581e+07	2.99883e+07	3.30607e+07	1.93205e+07	1.27906e+07	99325.6	8.97654e+06	3.43242e+07	8.22547e+06
LPC(26:2)pH	LPC	145604	336398	801597	324227	3.09794e+06	1.09112e+08	2.95204e+06	576252	612389
LPC(26:2)pHCOO	LPC	0	0	0	0	0	5.20651e+06	0	0	0
LPC(26:3)pH	LPC	4.30668e+06	3.41399e+06	2.27243e+06	3.98396e+06	2.27556e+06	7617.9	882270	604345	1.0606e+06
LPC(26:4)pH	LPC	1.24207e+07	1.05531e+07	2.43194e+07	1.7469e+07	1.09865e+07	0	4.25461e+06	529844	6.69467e+06
LPC(26:4)pH	LPC	883.716	184628	115923	0	0	2.70611e+07	406.539	17977.2	0
LPC(26:5)pH	LPC	4.00636e+06	4.30437e+06	3.70181e+06	4.28241e+06	4.35659e+06	0	436859	678356	785838
LPC(26:5)pH	LPC	0	0	1018.4	0	0	3.01327e+06	0	1035.07	0
LPC(28:0)pH	LPC	7.05613e+08	7.36967e+08	9.53353e+08	8.42373e+08	5.3499e+08	258711	4.38251e+08	2.80603e+08	6.7626e+08
LPC(28:0)pH	LPC	0	0	0	0	0	8.58338e+08	0	0	0
LPC(28:1)pH	LPC	8.41395e+06	1.10504e+07	7.77987e+07	5.61239e+07	2.02486e+07	57869.3	1.9524e+06	1.95665e+07	3.02804e+07
LPC(28:1)pH	LPC	2.32948e+08	2.0392e+08	2.79172e+08	2.35455e+08	3.00858e+06	7.06903e+07	1.44769e+08	3.92778e+07	1.7115e+08
LPC(33:6)pH	LPC	1.58809e+07	934240	2.62572e+06	6.09128e+06	8.39389e+06	652333	3.71046e+07	1.12982e+07	3.98305e+07
LPC(33:6)pH	LPC	0	0	0	0	0	1.92961e+06	671332	0	0
LPC(35:5)pH	LPC	2.14111e+07	3.95857e+07	6.0836e+07	4.29209e+06	1.52575e+07	5.03935e+06	9.70842e+07	3.30825e+07	9.65957e+07
LPC(35:5)pH	LPC	0	0	0	0	0	5.01811e+07	0	0	0
LPC(36:6)pHCOO	LPC	5.41736e+06	6.42255e+06	3.32191e+06	6.83449e+06	2.92344e+06	11369.7	4.36041e+06	7.97264e+06	1.31368e+07
LPC(37:4)pH	LPC	2.44159e+07	1.66208e+07	2.87564e+07	5.8156e+06	1.35657e+07	3.04114e+06	7.56086e+06	2.03942e+07	5.92981e+07
LPC(37:5)pH	LPC	1.23218e+07	7.91343e+07	9.84126e+07	2.28677e+07	6.63702e+07	4.35552e+06	1.19015e+07	1.47623e+08	1.84599e+08
LPC(37:5)pH	LPC	3.04269e+06	0	7.30408e+06	0	0	8.11529e+07	870466	6.30788e+06	1.65611e+07
LPC(37:6)pH	LPC	9.9047e+07	9.52275e+07	7.4786e+07	4.73425e+07	9.82761e+07	8.68338e+08	1.44163e+08	9.36555e+07	1.31514e+08
LPC(38:4)pHCOO	LPC	3.61521e+07	1.48763e+07	4.11411e+07	1.99071e+06	5.21096e+06	808246	7.43485e+06	8.83982e+07	9.5658e+07
LPE(14:0)nH	LPE	2.26199e+06	3.3351e+06	4.01314e+06	2.14481e+06	1.17609e+06	0	387410	219709	490442
LPE(14:0)pH	LPE	4.75447e+06	5.22928e+06	6.82507e+06	4.73975e+06	2.76081e+06	0	1.29363e+06	893485	2.04192e+06
LPE(14:0)nH	LPE	8.0433e+06	1.01946e+07	9.35389e+06	5.68706e+06	3.84953e+06	1.17141e+06	1.5953e+06	1.35939e+06	687386
LPE(14:0)pH	LPE	9.57889e+06	2.01688e+07	1.83546e+07	1.25209e+07	8.14795e+06	2.64674e+06	3478996	2.7372e+06	3.08676e+06
LPE(14:0)nH	LPE	0	0	0	0	0	4.14494e+06	0	0	0
LPE(16:0)nH	LPE	4.70607e+07	6.26128e+07	5.64866e+07	3.52523e+07	2.82834e+07	4443.44	1.1586e+07	9.92334e+06	1.38817e+07
LPE(16:0)nH	LPE	2.58332e+08	3.17947e+08	2.87605e+08	2.09311e+08	1.66271e+08	2.7221e+07	7.31316e+07	5.89322e+07	7.55169e+07
LPE(16:0)nH	LPE	596337	864466	397066	120097	508271	1.81157e+08	42739.1	45548.8	14204.1
LPE(16:0e)nH	LPE	1.00188e+07	1.3528e+07	1.41991e+07	1.08499e+07	100707	0	9.75024e+06	8.02973e+06	1.08831e+07
LPE(16:0e)nH	LPE	0	0	0	0	0	9.85452e+06	0	0	0
LPE(16:0p)pNa	LPE	1.31414e+07	2.04626e+07	1.45594e+07	7.7971e+06	7.74708e+06	87794.4	7.87544e+06	7.80693e+06	9.41414e+06
LPE(16:0p)nH	LPE	2.18044e+08	2.55733e+08	2.51605e+08	1.70422e+08	1.63387e+08	775942	1.47342e+08	1.20949e+08	1.55747e+08
LPE(16:0p)nH	LPE	84404.5	416461	387700	70249.1	482097	1.58098e+08	155742	75631.3	67064.4
LPE(16:0p)pNa	LPE	0	0	0	0	0	8.49076e+06	713.98	0	0
LPE(16:1)nH	LPE	6.10085e+07	8.78756e+07	6.71548e+07	3.05199e+07	2.342e+07	1.04526e+07	1.31497e+07	1.09738e+07	1.48987e+07
LPE(16:1)nH	LPE	3.83151e+06	2.62734e+06	1.21435e+06	1.2852e+06	1.52324e+06	2.51003e+07	1.08475e+06	376475	433293
LPE(17:0)nH	LPE	1.25647e+07	1.47399e+07	1.4565e+07	9.46269e+06	7.81716e+06	2.18222e+06	4.1999e+06	3.95359e+06	4.99649e+06
LPE(17:0)nH	LPE	0	0	0	0	0	8.34574e+06	0	0	0
LPE(17:1)nH	LPE	6.45755e+06	9.53107e+06	9.09878e+06	3.34045e+06	2.92981e+06	795445	1.95049e+06	1.8506e+06	2.15908e+06
LPE(17:1)nH	LPE	0	322523	355834	77217.7	118341	3.69173e+06	693789	1.35117e+06	255037
LPE(18:0)nH	LPE	5.3013e+08	6.36311e+08	5.91159e+08	4.67098e+08	4.07011e+08	2.38858e+07	2.2189e+08	1.9541e+08	2.28786e+08
LPE(18:0)nH	LPE	675655	190478	1.7761e+06	1.75871e+06	2.60248e+06	4.20212e+08	1.25468e+06	307605	36777.1
LPE(18:0p)nH	LPE	1.1769e+08	1.18818e+08	1.26158e+08	9.81802e+07	9.8615e+07	44272.6	7.85588e+07	6.60296e+07	7.8454e+07
LPE(18:0p)pNa	LPE	1.47207e+07	1.38695e+07	1.54238e+07	8.21274e+06	1.05317e+07	0	1.02006e+07	5.70481e+06	1.0595e+07
LPE(18:0p)nH	LPE	43799.9	70254.4	29673.8	23565.8	39878.9	1.05771e+08	61288	6338.76	11721.8
LPE(18:1)nH	LPE	2.22082e+08	2.87519e+08	2.64445e+08	1.37089e+08	1.10503e+08	0	6.82137e+07	5.56583e+07	6.625e+07
LPE(18:1)nH	LPE	7.3572e+08	9.87571e+08	8.3213e+08	4.76382e+08	4.05294e+08	1.32844e+08	2.08378e+08	1.71873e+08	2.08108e+08
LPE(18:1)nH	LPE	408149	1.21807e+06	632391	392609	695704	3.93483e+08	1.38539e+06	108755	86467.8
LPE(18:1p)nH	LPE	1.31853e+08	1.55496e+08	1.6082e+08	1.06579e+08	9.40318e+07	0	8.90212e+07	7.80882e+07	9.69666e+07
LPE(18:1p)pNa	LPE	1.11473e+07	1.29102e+07	1.22845e+07	3.67864e+06	6.65802e+06	0	532493	4.79505e+06	514573
LPE(18:1p)nH	LPE	346913	1384.79	1234.12	1051.04	1.34938e+06	9.18631e+07	338122	2245.79	60146.6
LPE(18:1p)pNa	LPE	0	0	0	0	0	7.37837e+06	0	0	0
LPE(18:2)nH	LPE	8.86251e+06	1.07368e+07	1.07691e+07	5.58623e+06	3.62528e+06	0	3.08889e+06	2.61598e+06	3.49812e+06
LPE(18:2)pH	LPE	1.80657e+07	2.36423e+07	2.38663e+07	1.00227e+07	7.45934e+06	607234	7.89691e+06	6.26504e+06	7.03123e+06
LPE(18:2)nH	LPE	1.92771e+07	2.65979e+07	2.11509e+07	9.42199e+06	6.65288e+06	3.19198e+06	6.05896e+06	5.11252e+06	6.81315e+06
LPE(18:2)nH	LPE	1.04845e+07	1.57148e+07	2.01984e+07	6.28709e+06	5.76089e+06	3.33981e+06	3.31482e+06	3.40432e+06	2.8582e+06
LPE(18:2)nH	LPE	5.60236e+06	6.20071e+06	4.996e+06	3.1649e+06	3.51875e+06	7.01707e+06	2.07686e+06	107261	180084
LPE(19:0)nH	LPE	3.03572e+06	4.69575e+06	3.57236e+06	2.23557e+06	1.14121e+06	132068	1.22555e+06	172774	942180
LPE(19:0)nH	LPE	0	120.502	0	0	292.293	2.23356e+06	0	0	0
LPE(19:1)nH	LPE	7.42324e+06	8.33515e+06	7.59292e+06	4.67465e+06	4.00515e+06	59909.4	2.46891e+06	1.96438e+06	2.28079e+06
LPE(19:1)nH	LPE	21447.5	502720	24409.1	394326	72054.1	4.44344e+06	186813	382486	120988
LPE(20:0)nH	LPE	1.63057e+07	9.07847e+06	1.41231e+07	1.19096e+07	1.03817e+07	0	7.44657e+06	1.67039e+06	4.813e+06
LPE(20:0)nH	LPE	0	8090.74	0	0	0	1.24148e+07	0	0	0
LPE(20:0p)pNa	LPE	1.04891e+07	4.99699e+06	1.13616e+07	7.79374e+06	7.77176e+06	0	4.58053e+06	2.88128e+06	6.25986e+06
LPE(20:0p)pNa	LPE	0	0	0	0	0	1.04532e+07	0	0	0
LPE(20:1)nH	LPE	5.19665e+07	6.24386e+07	5.8009e+07	4.71974e+07	3.65565e+07	18161.6	2.13216e+07	1.90413e+07	2.15917e+07
LPE(20:1)nH	LPE	39852.9	834268	175229	171796	2.72069e+06	3.84588e+07	31457.2	310723	34169.7
LPE(20:1p)nH	LPE	3.65327e+06	2.60604e+06	4.33174e+06	2.88827e+06	2.61242e+06	0	2.45699e+06	1.02078e+06	2.98935e+06
LPE(20:2)nH	LPE	5.89252e+06	7.62293e+06	5.9109e+06	4.20709e+06	3.2824e+06	719001	1.62379e+06	1.87968e+06	1.86162e+06
LPE(20:2)nH	LPE	4.75503e+06	5.69189e+06	5.23266e+06	2.81007e+06	2.51837e+06	700889	1.41718e+06	2.18118e+06	1.69117e+06
LPE(20:3)nH	LPE	1.4409e+07	1.90752e+07	1.44054e+07	1.09441e+07	4.28992e+06	45567.6	4.26138e+06	8.36561e+06	4.1748e+06
LPE(20:3)nH	LPE	7.10346e+06	8.95393e+06	5.75097e+06	4.55059e+06	1.60865e+06	3.8382e+06	4.03729e+06	2.93247e+06	2.61806e+06
LPE(20:4)nH	LPE	1.1992e+08	1.71086e+08	1.30962e+08	7.35759e+07	4.58768e+07	8.32987e+06	6.47302e+07	6.78893e+07	8.40586e+07
LPE(20:4)pNa	LPE	1.10727e+07	1.48955e+07	1.01276e+07	5.38158e+06	3.66018e+06	262181	5.82495e+06	7.47366e+06	6.14577e+06
LPE(20:4)nH	LPE	1.40661e+06	998383	410221	654438	548714	6.18154e+07	889533	134699	689897
LPE(20:5)nH	LPE	3.0738e+06	3.6954e+06	5.18646e+06	3.27343e+06	1.97557e+06	15647.3	2.38505e+06	2.20196e+06	1.84049e+06
LPE(20:5)nH	LPE	772412	658334	208864	15791.7	5261.75	4.43114e+06	465045	87713.4	150318
LPE(22:0)nH	LPE	3.31849e+06	4.10747e+06	6.23544e+06	5.92322e+06	3.6975e+06	0	24645.5	2.13672e+06	3.21314e+06
LPE(22:0)nH	LPE	0	0	0	0	0	4.4814e+06	0	0	0
LPE(22:1)nH	LPE	2.30889e+07	1.25093e+07	2.48338e+07	2.22684e+07	1.18381e+07	511348	1.26606e+07	2.676e+06	6.46531e+06
LPE(22:1)nH	LPE	5860.45	31073	18420.1	65705.7	136591	2.26545e+07	32196.3	0	16163.6
LPE(22:2)nH	LPE	5.21744e+06	3.97782e+06	1.00154e+07	6.8658e+06	3.3917e+06	5632.65	2.69121e+06	4.05149e+06	4.36124e+06
LPE(22:2)nH	LPE	0	0	0	0	0	8.63964e+06	0	0	0
LPE(22:3)nH	LPE	1.96733e+06	2.50422e+06	2.43615e+06	1.89426e+06	1.1166e+06	0	1.43246e+06	1.98896e+06	1.69195e+06
LPE(22:4)nH	LPE	3.53228e+07	4.84009e+07	3.47168e+07	2.86081e+07	1.65897e+07	59822.1	2.23416e+07	2.49351e+07	2.52895e+07
LPE(22:4)nH	LPE	50728.1	116452	270360	74756.2	405588	2.58533e+07	27108.1	102943	171013
LPE(22:4)pNa	LPE	0	240236	322689	74244.4	0	1.98289e+06	26047.9	90984.7	27005.1
LPE(22:5)nH	LPE	1.51546e+07	1.89933e+07	1.70595e+07	1.45461e+07	9.59314e+06	118130	8.88026e+06	1.18204e+07	1.0055e+07
LPE(22:5)pNa	LPE	711809	3.85534e+06	320916	683775	266218	148210	662121	1.16322e+06	734027
LPE(22:5)pH	LPE	3.08854e+07	4.54897e+07	3.71643e+07	3.49759e+07	2.18671e+07	175004	2.20491e+07	3.23002e+07	2.20759e+07
LPE(22:5)nH	LPE	3.87301e+07	5.27183e+07	3.76908e+07	2.93384e+07	1.75607e+07	392155	2.27602e+07	2.84177e+07	2.7746e+07
LPE(22:5)pNa	LPE	2.60357e+06	2.75977e+06	3.60839e+06	2.16733e+06	905451	92897.7	1.46945e+06	3.45407e+06	2.43989e+06
LPE(22:5)pH	LPE	2.11202e+07	3.00758e+07	1.23871e+07	8.71517e+06	8.04074e+06	3.12828e+07	2.09248e+07	1.50216e+07	1.27348e+07
LPE(22:5)nH	LPE	5.29622e+06	1.07586e+07	8.22055e+06	2.6688e+06	2.4254e+06	2.54647e+07	6.77689e+06	5.34296e+06	4.92084e+06
LPE(22:6)nH	LPE	1.91237e+07	23025134	2.15346e+07	1.4971e+07	1.05777e+07	0	1.02512e+07	9.82563e+06	1.22127e+07
LPE(22:6)pNa	LPE	817546	802258	442223	495917	245125	79298.1	251987	2.57856e+06	156094
LPE(22:6)pH	LPE	4.27144e+07	5.09436e+07	5.19286e+07	3.99824e+07	2.31911e+07	101461	2.42807e+07	3.05963e+07	2.52892e+07
LPE(22:6)nH	LPE	4.6788e+07	6.25493e+07	5.20567e+07	3.09176e+07	1.96803e+07	3.96469e+06	2.30176e+07	2.87088e+07	2.89364e+07
LPE(22:6)nH	LPE	17467.4	57002.6	65356.4	138483	9475.39	2.85311e+07	166447	17974.4	12067.8
LPE(24:0)nH	LPE	3.65887e+06	1.38466e+06	1.00632e+06	1.52861e+06	2785.42	0	1.59772e+06	1.20007e+06	544352
LPE(24:0)nH	LPE	0	0	0	0	0	5.75373e+06	0	0	0
LPE(24:1)nH	LPE	1.12638e+07	1.48127e+07	2.21178e+07	1.9772e+07	1.37519e+07	135594	3.01348e+06	2.74712e+06	8.89295e+06
LPE(24:1)nH	LPE	0	0	0	0	0	2.27499e+07	0	0	0
LPE(24:2)nH	LPE	5.43621e+06	6.2609e+06	5.34595e+06	4.26247e+06	3.08259e+06	0	1.73301e+06	854798	1.57619e+06
LPE(24:2)nH	LPE	19174.5	0	0	0	0	4.84228e+06	0	0	0
LPE(24:4)nH	LPE	1.17154e+06	1.46675e+06	1.446e+06	1.92073e+06	1.33124e+06	43580.9	1.75105e+06	1.42167e+06	876004
LPE(24:4)nH	LPE	14038.8	21274.3	20621.1	0	11590.6	3.66535e+06	0	0	0
LPE(24:5)nH	LPE	3.60015e+06	4.45303e+06	3.75664e+06	3.13969e+06	1.73475e+06	0	1.56045e+06	2.14505e+06	2.16447e+06
LPE(24:5)nH	LPE	0	0	0	0	5635.37	2.83197e+06	0	0	0
LPG(16:0)nH	LPG	9.05797e+06	1.37922e+07	2.40349e+07	8.14913e+06	7.83552e+06	906398	5.311e+06	5.70001e+06	5.14164e+06
LPG(16:0)nH	LPG	0	0	0	0	0	8.38361e+06	648.455	0	854.885
LPG(16:1)nH	LPG	2.93746e+06	3.57671e+06	4.68135e+06	2.90835e+06	2.88459e+06	393891	1.83551e+06	1.5808e+06	2.07453e+06
LPG(16:1)nH	LPG	0	0	0	0	6299.19	2.47928e+06	0	0	0
LPG(18:0)nH	LPG	5.18885e+06	6.7314e+06	7.85333e+06	5.1384e+06	4.75668e+06	16336.3	5.21102e+06	4.45484e+06	5.58911e+06
LPG(18:0)pH	LPG	1.35071e+06	1.82522e+06	1.6773e+06	1.77549e+06	1.6354e+06	0	1.8468e+06	1.78861e+06	1.81138e+06
LPG(18:0)nH	LPG	0	0	0	0	0	4.6937e+06	0	0	0
LPG(18:1)nH	LPG	2.7122e+07	4.48305e+07	3.72865e+07	2.57087e+07	2.24254e+07	4.36922e+06	2.23209e+07	2.22092e+07	2.76495e+07
LPG(18:1)pH	LPG	1.03349e+07	1.74606e+07	1.53887e+07	1.10805e+07	9.12259e+06	44091.6	9.88119e+06	988846	1.12792e+07
LPG(18:1)nH	LPG	358503	295535	305216	40865.8	293111	2.34989e+07	202559	234660	141356
LPG(18:1)pH	LPG	0	0	0	87069.8	18808.2	1.0022e+07	2144.38	115843	60434.3
LPG(20:1)nH	LPG	1.44236e+06	2.12984e+06	2.05248e+06	1.25389e+06	24478.9	17656.3	1.3364e+06	1.34864e+06	1.59042e+06
LPG(22:6)nH	LPG	4.67272e+06	8.01892e+06	6.00434e+06	4.1155e+06	3.62522e+06	211667	3.39883e+06	4.11476e+06	4.76012e+06
LPG(22:6)nH	LPG	0	0	0	0	0	3.2176e+06	0	0	0
LPI(16:0)nH	LPI	8.5995e+06	1.55688e+07	1.00732e+07	7.51232e+06	5.62803e+06	14031.4	4.8639e+06	4.92193e+06	4.72211e+06
LPI(16:0)nH	LPI	3432.33	36740.3	20381.5	0	11688.7	7.22878e+06	0	11133.7	0
LPI(16:1)nH	LPI	2.68106e+06	3.10846e+06	2.58067e+06	1.43417e+06	1.10254e+06	831416	751192	1.025e+06	2.85817e+06
LPI(16:1)nH	LPI	126227	121373	33357.8	85915.6	133889	3.25418e+06	41627.4	11015.8	9556.48
LPI(18:0)nH	LPI	1.31656e+07	2.15113e+07	1.26101e+07	8.6461e+06	5.67847e+06	8394.52	8.12576e+06	9.37699e+06	9.62944e+06
LPI(18:0)nH	LPI	8.29649e+07	1.19837e+08	8.51657e+07	8.11753e+07	6.02315e+07	3.05599e+06	7.46143e+07	8.42065e+07	6.84874e+07
LPI(18:0)pH	LPI	2.14059e+07	3.10829e+07	2.3871e+07	2.17162e+07	1.521e+07	41195.9	1.91829e+07	2.18241e+07	1.74896e+07
LPI(18:0)nH	LPI	20500.5	98946.3	103583	292628	22957.6	7.65291e+07	186317	206380	75122.4
LPI(18:0)pH	LPI	0	0	0	0	0	2.00941e+07	0	0	0
LPI(18:1)nH	LPI	4.64167e+07	8.17085e+07	9.60873e+07	4.30197e+07	3.27305e+07	5.67114e+06	2.55593e+07	2.28985e+07	2.06769e+07
LPI(18:1)nH	LPI	1.18119e+06	1.80557e+06	1.30639e+06	1.11026e+06	900332	4.36371e+07	23120.7	556002	417547
LPI(20:1)nH	LPI	3.43373e+06	6.05036e+06	2.59569e+06	2.58476e+06	2.32276e+06	0	1.06577e+06	2.02895e+06	2.22942e+06
LPI(20:1)nH	LPI	468.516	0	0	0	0	5.25894e+06	0	0	0
LPI(20:2)nH	LPI	250954	403086	491612	396689	205311	0	596607	672677	82489.6
LPI(20:2)nH	LPI	2.09611e+06	4.09432e+06	2.98198e+06	1.7219e+06	1.20445e+06	0	1.46041e+06	2.01772e+06	1.73604e+06
LPI(20:3)nH	LPI	755883	4.6665e+06	643460	828999	1.09445e+06	81679.6	1.82489e+06	1.65725e+06	448844
LPI(20:4)nH	LPI	1.06539e+07	2.12822e+07	1.26826e+07	6.30864e+06	5.01863e+06	3.26655e+06	8.88751e+06	9.10747e+06	1.00224e+07
LPI(20:4)nH	LPI	780128	862739	174049	283267	515519	5.88074e+06	801755	239076	204123
LPI(22:2)nH	LPI	1.38282e+06	2.08432e+06	1.07224e+06	1.1284e+06	196901	0	632808	678770	641960
LPI(22:4)nH	LPI	1.33352e+06	3.10711e+06	1.3139e+06	866454	7406.93	0	692486	1.01752e+06	1.0763e+06
LPI(22:5)nH	LPI	1.09344e+06	2.65209e+06	1.08408e+06	946448	613878	67401.3	1.08906e+06	986865	1.20348e+06
LPI(22:6)nH	LPI	887253	2.46107e+06	684097	667576	696250	0	957290	463199	869689
LPS(16:0)nH	LPS	6.78406e+06	1.37874e+07	6.02992e+06	5.44319e+06	3.32624e+06	696395	3.14679e+06	3.14202e+06	2.70458e+06
LPS(16:0)pH	LPS	9.3336e+06	2.43215e+07	1.14475e+07	8.74049e+06	5.85981e+06	995889	5.28623e+06	4.75845e+06	5.17485e+06
LPS(16:0)pH	LPS	20880.3	60271.8	0	0	0	6.22805e+06	0	0	0
LPS(16:1)nH	LPS	1.85744e+06	2.59313e+06	3.64742e+06	1.24786e+06	699199	660912	626917	279112	707564
LPS(16:1)pH	LPS	2.78375e+06	5.66839e+06	3.75691e+06	2.12683e+06	1.5816e+06	618261	2.26163e+06	1.09069e+06	1.08614e+06
LPS(18:0)pH	LPS	7.36769e+06	1.93314e+07	8.4126e+06	4.621e+06	3.68992e+06	0	5.18897e+06	4.8862e+06	4.88231e+06
LPS(18:0)nH	LPS	4.42962e+07	8.35854e+07	4.90221e+07	3.93087e+07	2.73627e+07	2.93578e+06	3.90166e+07	4.02155e+07	3.30817e+07
LPS(18:0)pH	LPS	7.25216e+07	1.49993e+08	8.62411e+07	6.4688e+07	3.59804e+07	4.32629e+06	8.6836e+07	8.08338e+07	4.59063e+07
LPS(18:0)nH	LPS	669349	66584.4	305409	408581	390684	3.65832e+07	279121	70326.7	349759
LPS(18:1)nH	LPS	2.5536e+07	5.76319e+07	3.54315e+07	2.00308e+07	1.29989e+07	6.28028e+06	1.55919e+07	1.67605e+07	1.2059e+07
LPS(18:1)pH	LPS	5.43642e+07	1.17077e+08	6.65651e+07	3.99231e+07	2.70408e+07	1.23324e+07	3.27317e+07	3.24116e+07	2.62954e+07
LPS(18:1)pH	LPS	214841	271651	188286	185886	226573	4.12983e+07	482.221	132719	145379
LPS(22:4)pH	LPS	1.67853e+06	6.3514e+06	2.21369e+06	1.1628e+06	500879	0	1.79056e+06	1.22838e+06	380328
LPS(22:5)nH	LPS	2.11691e+06	4.4262e+06	2.77889e+06	1.60782e+06	817873	14115.6	1.52502e+06	1.6254e+06	1.4306e+06
LPS(22:5)pH	LPS	4.48895e+06	1.28442e+07	6.4675e+06	4.22279e+06	3.11259e+06	442751	4.08284e+06	3.7933e+06	4.49213e+06
LPS(22:6)pH	LPS	3.55689e+06	4.46506e+06	3.39994e+06	3.33919e+06	1.22738e+06	68584.2	3.21267e+06	3.56649e+06	1.66013e+06
LSM(d18:1)pH	LSM	7.13539e+06	7.67676e+06	1.03246e+07	7.07293e+06	7.91794e+06	0	3.18673e+06	2.45266e+06	4.02357e+06
LSM(d18:1)pH	LSM	0	0	0	0	0	4.77379e+06	0	0	0
LSM(d20:1)pH	LSM	3.04815e+07	3.00985e+07	3.70371e+07	3.125e+07	33282328	67442.1	1.52658e+07	1.51746e+07	1.61378e+07
LSM(d20:1)pH	LSM	0	0	0	0	0	3.15942e+07	0	0	0
LSM(d20:2)pH	LSM	3.74903e+07	3.47273e+07	4.82986e+07	3.49874e+07	3.94972e+07	2.89829e+06	1.67972e+07	1.49384e+07	1.8479e+07
LSM(d20:2)pH	LSM	104077	0	0	118539	381335	3.59273e+07	16907.8	0	187720
LdMePE(14:0)nH	LdMePE	5.61249e+06	8.93391e+06	6.81343e+06	3.59013e+06	2.62004e+06	721920	1.67426e+06	1.40613e+06	1.7681e+06
LdMePE(14:0)nH	LdMePE	22252.2	31395.5	362384	488277	6128.48	3.44626e+06	22579	16545.6	167915
LdMePE(16:0)nH	LdMePE	3.97501e+07	5.65212e+07	4.68079e+07	2.61949e+07	2.60703e+07	4.1238e+06	1.71747e+07	1.43388e+07	2.16408e+07
LdMePE(16:0)nH	LdMePE	3.70225e+06	3.48527e+06	2.174e+06	1.63001e+06	1.23554e+06	3.22941e+07	845535	525931	645661
LdMePE(16:1)nH	LdMePE	7.66527e+06	1.43325e+07	8.03834e+06	4.50004e+06	3.52082e+06	1.26546e+06	2.48654e+06	2.3021e+06	2.9745e+06
LdMePE(16:1)nH	LdMePE	1.79544e+06	1.78148e+06	4.40903e+06	1.93449e+06	1.88778e+06	2.91243e+06	919704	813633	1.0547e+06
LdMePE(18:0)nH	LdMePE	1.31114e+07	1.44978e+07	1.87607e+07	1.52512e+07	1.35244e+07	709177	9.70092e+06	7.57644e+06	1.02113e+07
LdMePE(18:0)nH	LdMePE	755.382	0	0	0	9884.44	1.30681e+07	0	0	0
LdMePE(18:1)nH	LdMePE	1.13834e+07	1.31528e+07	1.15376e+07	5.34331e+06	5.26838e+06	0	4.40009e+06	4.04339e+06	6.2215e+06
LdMePE(18:1)nH	LdMePE	3.74809e+07	5.70565e+07	4.21273e+07	1.91774e+07	1.84521e+07	5.15056e+06	1.73361e+07	1.23099e+07	2.23781e+07
LdMePE(20:1)nH	LdMePE	2.19622e+06	2.52133e+06	3.25737e+06	2.1304e+06	2.26398e+06	0	1.14484e+06	689952	1.66354e+06
LdMePE(20:4)nH	LdMePE	939297	1.73495e+06	545717	951341	61868.6	0	16456.6	942194	991418
MG(16:0)pH	MG	2.40606e+07	1.05024e+08	5.29394e+07	7.01828e+07	2.25596e+07	0	1.41574e+07	3.53978e+07	2.13653e+07
MG(16:0)pH	MG	24641.2	19369.4	22536	0	20182.8	2.16533e+07	21710.8	0	0
MG(18:0)pH	MG	8.11525e+06	1.16074e+07	4.21252e+07	1.39491e+07	1.91151e+07	0	2.51726e+07	335661	1.06282e+06
MG(18:0)pH	MG	0	0	0	0	1878.23	4.59379e+07	1374.39	0	1003.25
MG(18:1)pH	MG	1.24884e+07	2.06685e+08	5.18646e+07	6.04349e+07	1.07382e+07	169146	3.29184e+07	1.35586e+08	5.19274e+07
MG(18:1)pH	MG	2579.91	1262.32	43112.6	4676.89	510320	2.02219e+08	511747	88993.6	41760.7
MG(18:1)pNH4	MG	563144	23648	484437	152251	93750.4	1.47204e+07	307858	15434.4	74502.4
MG(20:3)pH	MG	1.36595e+08	1.56867e+08	2.34111e+08	1.18695e+08	1.19748e+08	3.3923e+06	8.71618e+07	5.87619e+06	1.07359e+08
MG(22:4)pH	MG	3.33186e+06	2.70734e+06	3.27695e+06	1.24375e+06	2.55102e+06	134052	5.47509e+06	1.03346e+07	7.48561e+06
MG(22:5)pH	MG	2.0361e+06	2.18305e+06	3.08104e+06	2.08729e+06	2.40818e+06	45376.9	4.25091e+06	4.74676e+06	4.29908e+06
MG(25:5)pH	MG	6.00073e+06	1.52381e+07	8.25682e+07	2.66123e+07	3.47273e+07	3.29918e+06	4.49904e+06	4.78094e+06	1.5105e+07
MG(25:5)pH	MG	8.84584e+07	9.54596e+07	1.12692e+08	1.21012e+08	6.4438e+07	1.51343e+06	1.10101e+08	2.04475e+07	1.08608e+08
MG(30:0)pH	MG	3.33883e+07	1.93155e+07	4.42918e+07	1.02392e+07	9.68016e+06	0	1.06588e+06	0	6.59867e+06
MG(32:0)pH	MG	5.25502e+08	5.51483e+08	5.30484e+08	5.51669e+08	5.86416e+08	843054	8.87201e+07	9.27573e+07	9.46175e+07
MG(32:0)pNH4	MG	3.29147e+08	3.986e+08	3.03816e+08	2.02665e+08	1.26689e+06	1.70236e+08	6.35265e+07	4.67547e+07	5.6005e+07
MG(32:1)pNH4	MG	5.0074e+07	5.6147e+07	4.3987e+07	3.72257e+07	2.49466e+07	0	1.39196e+07	4.5266e+06	1.22257e+07
MG(34:0)pH	MG	3.50861e+08	3.26957e+08	3.05108e+08	2.6589e+08	2.49975e+08	2.29974e+08	9.73839e+07	9.16637e+07	9.71477e+07
MG(34:0)pNH4	MG	2.57421e+08	2.47879e+08	2.13047e+08	1.10159e+08	9.49785e+07	1.27392e+08	5.43443e+07	5.09821e+07	6.59443e+07
MG(34:1)pH	MG	2.59899e+08	2.97748e+08	2.22061e+08	4.18919e+08	4.37776e+08	467482	1.98498e+08	1.76759e+08	1.39781e+08
MG(34:1)pNH4	MG	3.11142e+08	3.4761e+08	3.16171e+08	2.33957e+08	1.86236e+08	5.5475e+07	1.55178e+08	1.24482e+08	1.60323e+08
MG(34:2)pH	MG	8.71963e+08	1.2871e+09	5.65577e+08	8.72389e+08	1.0674e+09	3.75004e+06	4.0415e+08	2.84745e+08	3.49454e+08
MG(36:0)pH	MG	4.53037e+07	4.68763e+07	5.39438e+07	5.14834e+07	5.82896e+07	4.70027e+07	1.11906e+07	1.04313e+07	1.47787e+07
MG(36:0)pNH4	MG	3.6372e+07	3.88489e+07	4.6551e+07	3.39302e+07	2.66933e+07	54971.1	8.85521e+06	5.62393e+06	2.79688e+06
MG(36:1)pNH4	MG	9.38189e+07	7.22678e+07	7.77372e+07	3.84549e+07	3.49727e+07	37638.2	4.14673e+07	4.37728e+07	4.9866e+07
MG(38:0)pH	MG	1.9604e+07	1.75627e+07	2.09795e+07	2.54112e+07	1.68864e+07	564106	944780	4.61124e+06	1.82743e+06
MG(38:0)pNH4	MG	2.20187e+07	2.15207e+07	2.41527e+07	1.26319e+07	9701.32	3.53415e+06	1.87371e+06	3.03801e+06	3.81849e+06
MG(38:1)pNH4	MG	4.34775e+07	4.37854e+07	5.21609e+07	2.69305e+07	2.47704e+07	2.83437e+07	1.66657e+07	1.3465e+07	2.33482e+07
MG(38:4)pH	MG	2.31341e+08	2.26903e+08	2.2138e+08	1.89918e+08	1.9502e+08	4.18512e+07	2.75228e+08	3.00307e+08	3.49303e+08
MG(38:6)pH	MG	9.98157e+06	1.67227e+07	1.02486e+07	6.87472e+06	3.88192e+06	21557.6	1.10391e+07	5.56607e+07	4.05339e+07
MG(38:6)pNH4	MG	3.47813e+07	8.40316e+06	1.74446e+07	1.46065e+07	2.97335e+07	3228.5	6.78083e+07	7.16195e+07	7.10211e+07
MGDG(16:0/18:1)pHCOO	MGDG	1.33508e+07	7.93669e+06	2.53824e+07	1.84957e+07	1.4136e+06	4407.8	894069	5.70256e+06	6.16087e+06
MGDG(18:1/18:1)pHCOO	MGDG	2.28012e+06	1.186e+06	2.32111e+06	775953	539744	0	0	111183	4314.38
MGDG(18:1/18:2)nH	MGDG	1.92222e+07	1.78452e+07	2.54224e+07	1.51772e+08	1.2783e+06	4.69973e+07	7.32738e+06	4.58366e+06	9.23413e+06
MGDG(16:0/20:4)nH	MGDG	2.0442e+06	4.39228e+07	2.95583e+06	2.9893e+07	1.16963e+07	374769	3.06539e+07	1.9119e+07	4.65798e+06
MGDG(16:1/20:4)nH	MGDG	1.33989e+08	5.58918e+07	1.28059e+08	1.12586e+08	7.14722e+07	7.02461e+08	6.52581e+07	1.8334e+07	9.53681e+07
OAHFA(18:0/18:0)nH	OAHFA	778388	3.22619e+06	320335	4.31388e+06	11333.3	3.89792e+06	1.16837e+06	1.23817e+07	768897
OAHFA(38:2)nH	OAHFA	1.41761e+06	7.01956e+06	4.94351e+06	1.02572e+07	798032	0	4.00388e+06	2.33634e+06	6.35871e+06
OAHFA(38:2)nH	OAHFA	0	0	0	0	0	1.45009e+07	0	0	0
PA(16:0/14:0)nH	PA	2.55377e+06	1.69343e+06	3.81021e+06	2.95056e+06	6.35646e+06	0	4456.1	3.57791e+06	4.09862e+06
PA(16:0/14:0)nH	PA	0	0	0	0	0	245886	0	0	0
PA(16:0/16:0)nH	PA	336540	1.34063e+06	2.15898e+06	4.92005e+06	253980	6.18807e+06	3.74287e+06	192439	372059
PA(16:0/16:0)nH	PA	2.54939e+06	468507	843960	136758	109866	906447	144642	104424	53491.9
PA(18:1/14:0)nH	PA	6.88545e+06	4.50597e+06	1.81369e+07	1.41228e+07	905802	0	6.86237e+06	1.26464e+06	6.38173e+06
PA(18:1/14:0)nH	PA	7810.33	93314.9	0	9387.37	0	1.80506e+07	7035.81	105027	9315.24
PA(16:0/18:1)nH	PA	1.26891e+06	2.66668e+06	5.04833e+06	3.29246e+06	850773	868777	1.29091e+06	2.70759e+06	2.19089e+06
PA(16:0/18:1)nH	PA	1.09206e+06	237744	260823	303789	1.13969e+06	867951	192287	253989	904911
PA(16:0/18:1)nH	PA	290651	1.32636e+06	2.14114e+06	426939	316153	686056	947139	395146	1.86316e+06
PA(16:0/18:1)nH	PA	4.71876e+06	6.12208e+06	1.31688e+06	5.47224e+06	809752	489366	6.5723e+06	1.20193e+06	243194
PA(16:0/18:1)nH	PA	2.38399e+06	971101	852298	1.62437e+06	1.29003e+06	1.13915e+06	777200	1.1165e+06	1.57215e+06
PA(16:1/18:1)nH	PA	1.01361e+06	1.63282e+06	1.6428e+06	7.07682e+06	1.30569e+06	0	317647	1.36452e+06	2.86016e+06
PA(16:1/18:1)nH	PA	0	118314	0	0	0	8.81922e+06	0	126830	0
PA(18:0/18:1)nH	PA	6.87192e+06	6.24453e+06	7.9767e+06	7.71825e+06	3.49596e+06	1.96117e+07	1.05136e+07	1.45168e+07	1.62388e+07
PA(18:0/18:1)nH	PA	7.47966e+06	1.8917e+06	4.5275e+06	6.62286e+06	1.42201e+06	2.67122e+06	685717	1.9929e+06	4.09252e+06
PC(17:0)pH	PC	818500	1.22466e+07	3.72867e+06	1.37266e+07	385752	0	6.00629e+06	1.48853e+07	5.23299e+06
PC(21:0e)pH	PC	5.10722e+06	1.653e+06	6.36449e+06	6.73947e+06	3.37354e+06	0	3.16574e+06	1.33048e+06	2.71404e+06
PC(21:1e)pH	PC	2.46233e+07	2.23703e+07	2.51567e+07	1.86238e+07	2.20992e+07	185262	1.44072e+07	8.80541e+06	1.32834e+07
PC(21:1e)pH	PC	126164	0	0	0	0	1.33563e+07	0	0	0
PC(21:1p)pH	PC	2.14353e+07	3.42545e+07	2.43289e+07	3.19153e+07	1.7403e+07	0	5.25612e+06	2.56409e+06	6.88301e+06
PC(23:0p)pH	PC	5.68611e+06	2.224e+06	2.97474e+06	7.20748e+06	3.58836e+06	1423.52	3.41807e+06	2.46015e+06	3.76773e+06
PC(23:1p)pH	PC	2.23539e+06	1.34704e+06	400550	3.20992e+06	1.72477e+06	0	942743	74456.2	185348
PC(24:0)pH	PC	0	0	0	29669.7	92327	3.87832e+06	0	0	0
PC(25:0e)pH	PC	1.40687e+07	4.02614e+06	3.65649e+07	4.60757e+07	1.92557e+07	0	2.48714e+07	1.59078e+07	2.54677e+07
PC(25:0e)pH	PC	0	0	0	0	0	3.25636e+07	0	0	0
PC(25:0p)pH	PC	5.95499e+06	1.91461e+07	2.36794e+07	2.60567e+07	7.58795e+06	402836	6.54938e+06	1.0711e+07	1.20511e+07
PC(25:0p)pH	PC	0	0	0	0	0	2.18337e+07	0	0	0
PC(12:0/14:0)pHCOO	PC	6.23998e+06	1.15409e+07	1.96318e+07	1.27687e+07	8.72598e+06	0	954916	730700	2.3008e+06
PC(12:0/14:0)pNa	PC	1.20162e+06	2.46657e+06	898243	3.64214e+06	4.69084e+06	2780.39	247990	70756.2	263790
PC(26:0)pH	PC	9.08539e+07	2.03091e+08	2.9438e+08	2.78719e+08	1.2545e+08	0	2.71184e+07	2.6061e+07	2.61221e+07
PC(12:0/14:0)pHCOO	PC	11589.4	44374	0	2471.85	42735.2	1.14575e+07	0	13501.6	0
PC(12:0/14:0)pNa	PC	0	312399	99193.8	208364	221855	8.31967e+06	0	75855.5	0
PC(26:0)pH	PC	2249.21	88120.7	0	0	6367.38	2.41456e+08	0	0	0
PC(26:1)pH	PC	4.1037e+06	1.15081e+07	1.38874e+07	4.1576e+06	9.89077e+06	0	82967.8	458790	289123
PC(26:1)pH	PC	0	34456.2	0	0	61508.4	6.9355e+06	0	0	0
PC(27:0)pH	PC	3.49464e+06	1.13027e+07	1.40547e+06	1.76948e+07	2.94245e+06	2.29151e+06	1.39489e+07	1.32662e+07	7.00895e+06
PC(27:0)pH	PC	2.18246e+08	9.86669e+06	2.3149e+08	2.30659e+08	1.69303e+08	1.22529e+07	1.51632e+06	2.81573e+06	2.06812e+06
PC(27:0p)pH	PC	2.87473e+06	4.07307e+06	1.12386e+06	9.29987e+06	2.96775e+06	0	4.59083e+06	914314	8.32417e+06
PC(14:0/14:0)pNa	PC	1.42976e+08	7.16493e+07	1.13667e+08	1.33322e+08	1.05781e+08	2.94539e+07	1.07108e+08	1.04303e+08	1.58607e+08
PC(14:0/14:0)pHCOO	PC	8.94168e+08	3.48374e+08	1.13645e+09	1.04118e+09	7.24529e+08	41029.6	1.28489e+07	4.35768e+07	4.82614e+08
PC(28:0)pH	PC	1.53864e+10	6.78365e+09	1.8852e+10	1.70139e+10	1.22196e+10	3.54395e+06	1.92952e+09	2.22813e+09	9.65004e+09
PC(14:0/14:0)pHCOO	PC	612261	999663	727938	1.82702e+06	199569	1.06656e+09	71345.9	8017.83	135896
PC(14:0/14:0)pNa	PC	824900	177441	0	0	861983	1.78339e+08	0	115497	455689
PC(28:0)pH	PC	2.0615e+07	1.50408e+07	3.63664e+06	9.73073e+06	1.27569e+07	1.8882e+10	9.83739e+06	2.62957e+06	2.58509e+06
PC(14:0e/14:0)pHCOO	PC	3.4825e+07	3.37885e+06	4.2987e+07	3.3199e+07	2.33166e+07	0	1.24674e+07	1.77283e+07	2.38494e+07
PC(28:0e)pHCOO	PC	2046.19	0	0	0	0	3.4315e+07	91170.4	0	33053.7
PC(14:0p/14:0)pHCOO	PC	2.45286e+06	8.78514e+06	1.57941e+07	1.05894e+07	9.60121e+06	791398	5.32093e+06	5.4971e+06	6.61176e+06
PC(14:0p/14:0)pHCOO	PC	0	0	0	0	0	1.43353e+07	0	0	0
PC(14:0/14:1)pNa	PC	1.00994e+07	1.05893e+07	2.88692e+07	1.56712e+08	1.23795e+07	680175	693289	1.66265e+07	2.29399e+07
PC(14:0/14:1)pHCOO	PC	2.91234e+07	4.65815e+07	6.01267e+07	3.59202e+07	2.65594e+07	2.83942e+06	1.00531e+06	3.39882e+06	9.01549e+06
PC(28:1)pH	PC	5.35332e+08	6.60626e+08	1.35317e+09	1.19155e+09	1.8046e+08	710665	6.10375e+07	5.17185e+07	8.06096e+07
PC(16:1/12:0)pHCOO	PC	522940	140743	855920	277531	2642.51	4.14726e+07	62839.7	85754	52911.7
PC(16:1/12:0)pNa	PC	1.12584e+06	1.36849e+06	993539	2.43477e+06	218564	2.13211e+07	374443	309585	969826
PC(16:1/12:0)pCH3COO	PC	2.32087e+06	4.1411e+06	7.77535e+06	6.10177e+06	3.4614e+06	0	982396	547644	254377
PC(28:1)pH	PC	7.01932e+06	1.08637e+07	9.21559e+06	1.70119e+07	3.43557e+06	1.08315e+09	1.96394e+06	445667	3.92738e+06
PC(14:0/14:1)pCH3COO	PC	1.03105e+06	2.44928e+06	89010.5	66392.3	167354	5.70747e+06	44736.8	21979.5	3.4097e+06
PC(12:0e/16:1)pHCOO	PC	1.33726e+06	944164	2.10776e+06	816742	1.02708e+06	596621	504373	668502	1.40518e+06
PC(28:2)pH	PC	8.49808e+06	3.16731e+06	8.66478e+06	1.10589e+07	7.83854e+06	822288	463486	899621	1.37721e+06
PC(28:2)pH	PC	140263	1.71899e+06	296760	7.95319e+06	3.53434e+06	1.90743e+07	825888	1.00442e+06	405338
PC(8:0p/20:4)pH	PC	757077	144943	199665	8.92136e+06	5.00607e+06	541891	2.30452e+06	50717.9	220868
PC(15:0/14:0)pNa	PC	3.28594e+07	5.07909e+07	4.47444e+07	5.17527e+07	1.94766e+07	5.01247e+06	3.02566e+07	3.19306e+06	3.37279e+07
PC(15:0/14:0)pHCOO	PC	2.52453e+07	6.17755e+06	1.80168e+07	1.62089e+07	9.4939e+06	119776	3.98134e+06	183090	4.27002e+06
PC(29:0)pH	PC	3.26064e+08	2.08092e+09	2.55458e+09	2.44176e+09	2.23915e+08	1.27767e+07	1.11055e+08	1.13238e+08	1.23142e+09
PC(15:0/14:0)pNa	PC	4.78105e+08	3.85272e+07	7.51141e+08	1.93069e+07	3.10696e+07	7.84816e+06	1.97877e+07	2.78229e+07	1.51035e+08
PC(15:0/14:0)pNa	PC	830869	1.04921e+06	0	1.3024e+07	3.27896e+07	4.47017e+07	1.32184e+07	622382	0
PC(15:0/14:0)pHCOO	PC	1.41715e+06	1.26169e+06	802913	760796	477258	1.28831e+07	2.30548e+06	1.19478e+06	595956
PC(29:0)pH	PC	2.13979e+07	1.08367e+07	3.63429e+07	100365	2.60999e+07	2.21969e+09	2.69199e+06	2.77821e+06	2.47535e+07
PC(15:1/14:0)pHCOO	PC	3.71325e+06	4.1411e+06	7.85813e+06	6.10177e+06	3.52684e+06	0	973995	550882	329885
PC(29:1)pH	PC	6.83076e+07	8.50356e+06	1.79369e+08	2.28124e+08	9.66119e+07	192419	2.69231e+07	1.00524e+07	5.73703e+07
PC(29:1)pH	PC	7.04122e+07	6.43607e+07	6.08624e+07	1.06846e+08	1.89202e+07	1.76615e+08	734545	81968.7	9.55504e+06
PC(11:0/18:1)pH	PC	1.8035e+09	1.95151e+09	2.06625e+09	2.11787e+09	1.27889e+06	1.092e+06	8.48218e+08	7.3518e+08	9.45091e+08
PC(29:1e)pH	PC	2.70304e+07	6.54221e+07	9.48237e+07	5.44252e+07	4.69648e+07	692897	3.93723e+07	6.66054e+07	6.21419e+07
PC(29:1e)pH	PC	0	1.10009e+06	0	0	0	1.65755e+07	0	0	0
PC(30:0)pH	PC	0	2.43263e+06	0	1.81215e+06	54904.4	0	468078	1.42449e+06	1.09233e+06
PC(16:0/14:0)pHCOO	PC	2.43391e+09	1.89615e+09	2.79086e+09	2.53613e+09	2.17653e+09	3.99371e+06	9.1574e+08	5.57691e+08	1.12307e+09
PC(16:0/14:0)pNa	PC	7.45978e+07	7.81779e+07	7.7709e+07	5.96784e+07	6.34108e+07	2.38405e+07	5.94521e+07	2.38887e+07	6.75924e+07
PC(30:0)pH	PC	2.25999e+10	2.19151e+10	2.45112e+10	2.29445e+10	1.99887e+10	1.23153e+09	1.25403e+10	7.69612e+09	1.2427e+10
PC(16:0/14:0)pNa	PC	0	0	0	24932.9	0	5.75037e+07	27727.4	953.817	0
PC(30:0)pH	PC	1.99037e+08	7.51622e+07	1.337e+07	2.09955e+08	1.87718e+07	2.27772e+10	1.13726e+07	3.19441e+07	8.99873e+06
PC(16:0e/14:0)pHCOO	PC	1.80357e+08	1.1102e+08	1.92109e+08	2.22932e+08	1.6093e+08	0	9.28404e+07	2.32043e+07	9.93083e+07
PC(30:0e)pH	PC	2.56023e+09	2.58139e+09	3.00061e+09	2.50669e+09	2.27262e+09	348630	1.48983e+09	7.6681e+08	1.52197e+09
PC(16:0e/14:0)pHCOO	PC	86580.8	1.35742e+06	1.43344e+06	268336	834125	2.28222e+08	2.2168e+06	182521	901426
PC(30:0e)pH	PC	0	400.76	902824	0	1.53646e+06	2.59768e+09	153996	0	0
PC(14:0p/16:0)pHCOO	PC	2.72255e+06	995458	2.31894e+06	3.04272e+06	616236	0	0	96326.9	143512
PC(16:0p/14:0)pHCOO	PC	1.11698e+08	1.23986e+08	1.15598e+08	1.46693e+08	1.25676e+08	592099	1.0172e+08	8.64476e+07	1.17733e+08
PC(16:0p/14:0)pHCOO	PC	0	0	0	0	0	1.46751e+08	0	0	0
PC(16:1/14:0)pNa	PC	1.12066e+08	1.29036e+08	1.02222e+08	1.32946e+08	1.28462e+08	2.83269e+06	1.72709e+08	1.49822e+08	1.40459e+08
PC(16:1/14:0)pHCOO	PC	1.55811e+09	1.48952e+09	1.83836e+09	1.73681e+09	1.16548e+09	835174	6.15459e+08	5.33392e+08	7.07831e+08
PC(30:1)pH	PC	2.34516e+10	2.36299e+10	2.92172e+10	2.58111e+10	1.82397e+10	2.63692e+10	1.01592e+10	7.8477e+09	1.41497e+10
PC(16:1/14:0)pNa	PC	6.4933e+06	5.97013e+06	5.50153e+06	3.39693e+06	35815.9	9.23554e+07	778773	24451.7	33985.1
PC(16:1/14:0)pHCOO	PC	1.75277e+06	5.46535e+06	3.58595e+06	3.18665e+06	3.87761e+06	1.65159e+09	1.01202e+06	3.50804e+06	3.15032e+06
PC(30:1)pH	PC	1.33493e+08	2.41348e+08	1.82879e+08	2.10008e+07	2.76513e+08	2.81041e+10	1.53901e+08	1.87965e+07	1.18037e+08
PC(30:1e)pH	PC	4.57028e+08	2.7538e+08	5.88807e+08	2.5582e+08	2.64081e+08	433051	1.2443e+08	2.46509e+08	4.37049e+08
PC(30:1e)pH	PC	1.57568e+09	1.44277e+09	1.70825e+09	1.64333e+09	1.46818e+09	2.84903e+08	1.40824e+09	1.00216e+09	1.41167e+09
PC(30:1e)pH	PC	24336	1.39427e+06	0	0	0	1.55126e+09	0	0	0
PC(30:1p)pHCOO	PC	1.46971e+07	2.18186e+07	2.25901e+07	3.07759e+07	1.07262e+07	383413	1.56022e+06	668040	1.22132e+06
PC(30:1p)pHCOO	PC	9.04312e+06	1.68509e+07	1.37934e+07	1.57469e+07	6.81472e+06	390909	1.10078e+06	1.07601e+06	1.32929e+06
PC(30:1p)pHCOO	PC	215494	613619	460384	1.44152e+06	387949	9.25382e+06	252667	205977	2092.23
PC(16:1/14:1)pNa	PC	1.33599e+08	1.8991e+08	1.69004e+08	3.6207e+08	5.07e+07	479120	1.30759e+07	1.62186e+07	3.22176e+07
PC(16:1/14:1)pHCOO	PC	2.44113e+07	3.21505e+07	6.43959e+07	4.92609e+07	3.03813e+07	484524	2.63581e+06	3.50893e+06	1.48957e+07
PC(30:2)pH	PC	6.08831e+08	1.09264e+09	1.5638e+09	1.11744e+09	5.32535e+08	9.91103e+08	8.60628e+07	5.92519e+06	2.77881e+08
PC(16:1/14:1)pHCOO	PC	4.28392e+07	4.84351e+07	6.13917e+07	6.84584e+07	5.1685e+07	5.13687e+07	1.9526e+07	1.938e+07	3.39104e+07
PC(16:1/14:1)pCH3COO	PC	4.62396e+06	2.95276e+06	1.19279e+06	5.82722e+06	3.9424e+06	0	251952	342665	256049
PC(30:2)pH	PC	1.43234e+08	1.79362e+08	3.17969e+08	2.88813e+08	2.6937e+08	1.22394e+09	3.65052e+07	4.70322e+07	8.10251e+07
PC(30:2e)pH	PC	920695	5.53874e+06	1.01412e+06	9.64612e+06	4.11714e+06	0	7.1587e+06	1.85639e+06	1.29237e+07
PC(30:3)pH	PC	1.84093e+07	2.66292e+07	4.57446e+07	5.09313e+07	2.23748e+07	2.49151e+07	9.91737e+06	6.45134e+06	1.08894e+07
PC(30:3)pH	PC	4.80046e+07	1.80853e+07	1.29644e+08	1.18472e+08	5.18324e+07	2.98652e+07	6.24277e+06	1.35216e+06	3.60921e+07
PC(30:3)pH	PC	824900	143126	0	0	861983	1.2386e+08	0	391068	455689
PC(30:4)pH	PC	9.1968e+06	1.22881e+07	1.5463e+07	1.89159e+07	1.07724e+07	1.24892e+06	1.879e+06	2.98983e+06	2.63297e+06
PC(30:4)pH	PC	5.25259e+07	1.05337e+08	1.07178e+08	1.5656e+08	5.1681e+07	2.06815e+07	1.89808e+07	1.09441e+07	1.98373e+07
PC(30:4e)pH	PC	6.34263e+06	1.02428e+07	1.20509e+07	1.88542e+07	5.18972e+06	426011	6.71471e+06	3.70262e+06	7.9471e+06
PC(31:0)pH	PC	8.68773e+08	7.77652e+08	9.39458e+08	8.44478e+08	7.22994e+08	2.72836e+08	5.61438e+08	3.99267e+08	5.90897e+08
PC(31:0)pH	PC	1.40598e+09	1.52023e+09	1.67026e+09	1.59777e+09	1.3627e+09	2.26687e+07	9.0152e+08	7.52317e+08	8.00631e+08
PC(31:0)pH	PC	2.21638e+07	5.15746e+07	1.12428e+07	7.14931e+07	1.56324e+08	8.07734e+08	4.869e+07	1.16511e+07	5.71675e+06
PC(18:0/13:0)pH	PC	1.79506e+07	1.88652e+07	1.20763e+07	2.30992e+07	1.20523e+07	1.60701e+07	1.636e+07	2.16895e+07	1.58983e+07
PC(31:0e)pH	PC	1.30626e+07	7.87194e+07	9.13867e+07	1.07427e+07	1.55752e+06	262972	1.21459e+07	3.30616e+06	5.54725e+07
PC(31:0e)pH	PC	0	0	0	0	0	3.3918e+07	0	0	0
PC(31:0p)pH	PC	1.58987e+08	8.96758e+07	2.50032e+08	1.97589e+08	1.44537e+08	2.83421e+08	1.42204e+08	5.10664e+07	1.67784e+08
PC(31:0p)pH	PC	0	14161.7	0	0	633656	1.62325e+08	0	790554	0
PC(15:0/16:1)pHCOO	PC	2.03438e+08	5.85986e+07	2.47822e+08	2.15952e+08	1.12217e+08	223135	6.32516e+07	1.09577e+08	1.34314e+08
PC(31:1)pH	PC	6.10034e+09	5.40693e+09	7.38623e+09	5.90991e+09	3.58366e+09	2.80001e+07	1.78089e+09	3.85297e+07	4.47866e+09
PC(15:0/16:1)pHCOO	PC	1.09075e+07	8.503e+06	3.65874e+07	3.0919e+07	1.02765e+07	2.20848e+08	1.58888e+07	330717	2.63619e+07
PC(31:1)pH	PC	1.92283e+06	2.04389e+06	3.53686e+06	2.52021e+07	3.55396e+06	5.87766e+09	1.34662e+07	4.86824e+07	5.51869e+07
PC(31:1)pH	PC	7.53075e+09	2.32938e+09	7.50106e+09	6.83283e+09	6.26566e+09	5.08779e+06	1.35551e+09	2.78015e+09	4.17144e+09
PC(15:1/16:1)pHCOO	PC	4.29744e+06	3.20099e+06	8.75647e+06	6.02893e+06	43120.3	0	231252	82296.7	477772
PC(31:2)pH	PC	3.68164e+07	6.06273e+07	2.19247e+08	1.81018e+08	5.95177e+07	2.93127e+06	4.01591e+07	1.10878e+07	6.59409e+07
PC(31:2)pH	PC	3.64619e+07	1.94405e+07	9.3551e+07	1.22821e+08	6.59664e+07	8.20114e+06	1.62641e+07	5.73763e+06	5.82587e+06
PC(15:1/16:1)pH	PC	5.20592e+09	4.45326e+09	5.63359e+09	5.58559e+09	4.12338e+09	8.70517e+06	2.60095e+09	1.14571e+09	2.64084e+09
PC(31:2)pH	PC	807441	6.65242e+06	891615	6.37545e+07	8.16612e+07	5.32434e+09	1.17671e+07	1.60268e+06	0
PC(31:3)pH	PC	7.09257e+06	9.55281e+06	2.42477e+07	4.47739e+06	926234	563899	951294	532096	3.51707e+06
PC(31:3)pH	PC	2.03318e+06	3.14621e+06	2.68311e+06	857524	619913	7.82465e+06	372685	63970.3	774563
PC(16:1/15:2)pH	PC	6.79944e+08	4.93705e+08	7.63269e+08	7.26282e+08	2.49534e+08	1.72577e+06	9.46343e+07	7.0256e+07	2.03057e+08
PC(16:0/16:0)pHCOO	PC	1.0506e+09	5.70397e+08	1.1402e+09	1.11496e+09	7.34745e+08	3.4596e+06	2.84322e+08	1.93293e+08	2.62077e+08
PC(32:0)pH	PC	6.87141e+09	6.95356e+09	8.70312e+09	6.82385e+09	7.18788e+09	3.01626e+09	1.93539e+09	1.8325e+09	2.55564e+09
PC(16:0/16:0)pHCOO	PC	3.5858e+07	30110005	9.78236e+07	3.7442e+07	2.45256e+07	5.61495e+08	3.71626e+07	4.63146e+07	7.96799e+07
PC(32:0)pH	PC	4.26378e+07	6.88816e+07	1.4186e+07	2.63059e+07	2.71003e+09	6.81101e+09	1.45858e+07	2.43317e+07	2.78882e+08
PC(16:0e/16:0)pHCOO	PC	4.25619e+08	8.11823e+07	5.11355e+08	4.11126e+08	4.33704e+08	2.3785e+06	3.0811e+07	1.72452e+08	1.70191e+08
PC(32:0e)pH	PC	4.99018e+09	1.69969e+09	5.38064e+09	4.68776e+09	4.273e+09	1.39821e+07	2.0033e+09	9.33702e+08	2.48228e+09
PC(32:0e)pH	PC	9.51575e+06	1.72124e+07	3.88628e+06	7.59842e+06	3.939e+07	3.34577e+09	4.44559e+06	5.07909e+06	1.4998e+06
PC(32:0e)pHCOO	PC	4542.81	126702	66907.9	748323	2.15213e+06	3.46599e+08	936111	150774	164691
PC(18:0p/14:0)pHCOO	PC	3.00447e+07	2.69553e+07	5.39798e+07	1.21294e+07	5.95677e+06	86492.4	7.44175e+06	3.91444e+07	1.96439e+07
PC(16:0p/16:0)pHCOO	PC	3.10664e+08	2.21436e+08	3.22663e+08	2.98564e+08	2.92771e+08	1.87526e+08	2.25754e+07	1.66648e+08	1.81423e+08
PC(16:0p/16:0)pHCOO	PC	372694	65841	382365	0	965880	2.3243e+08	0	0	158.218
PC(18:1/14:0)pNa	PC	6.12959e+07	8.4329e+07	2.79245e+07	1.19811e+06	8.38099e+07	6.65781e+08	5.73591e+07	7.441e+07	8.31173e+07
PC(18:1/14:0)pHCOO	PC	5605949491	3.41578e+09	6.41731e+09	6.06469e+09	4.81952e+09	3.13023e+07	3.52802e+09	1.47462e+08	3.96294e+09
PC(32:1)pH	PC	4.81425e+10	3.08001e+10	5.1151e+10	4.79222e+10	4.18094e+10	2.32409e+08	3.64707e+10	2.90323e+10	3.75426e+10
PC(16:0/16:1)pHCOO	PC	5.76557e+09	4.79569e+09	6.40489e+09	6.12142e+09	4.86099e+09	3.13023e+07	3.57056e+09	7.6766e+06	4.02452e+09
PC(16:0/16:1)pHCOO	PC	2.33978e+08	1.51838e+08	1.81415e+08	3.30688e+08	5.97398e+08	5.17322e+09	3.1677e+08	1.04765e+08	1.43686e+08
PC(32:1)pH	PC	1.51045e+08	1.1742e+08	1.53811e+08	1.6e+08	1.00941e+08	2.66226e+10	1.65151e+08	1.45514e+08	4.75997e+07
PC(18:1/14:0)pH	PC	1.4945e+08	1.03058e+08	1.4739e+08	1.6861e+07	1.26704e+08	1.3545e+08	8.84625e+07	9.09081e+07	1.17247e+08
PC(9:0/23:1)pH	PC	767538	1.03138e+07	5.71478e+06	2.58882e+06	7.88905e+06	1.76693e+06	1.25833e+06	3.86627e+06	1.45776e+06
PC(16:0e/16:1)pHCOO	PC	3.04413e+08	2.37778e+08	4.45856e+08	4.00832e+08	2.87139e+08	268654	2.72342e+08	1.7449e+08	3.00569e+08
PC(32:1e)pH	PC	4.82369e+09	1.09171e+09	5.88103e+09	4.99744e+09	4.01581e+09	2.10136e+06	4.3484e+09	1.03544e+09	4.68465e+09
PC(14:0e/18:1)pHCOO	PC	8.07664e+07	1.84632e+07	1.48003e+08	4.48978e+06	379122	3.91475e+08	1.04253e+06	2.28182e+07	8.42927e+07
PC(32:1e)pH	PC	3.84441e+09	3.23633e+09	3.94967e+09	5.62677e+07	9.60546e+06	1.55427e+09	2.0177e+09	1.86044e+09	2.36738e+09
PC(32:1e)pH	PC	3.04049e+06	9.20815e+06	2.00144e+06	2.45524e+06	2.58764e+08	2.8298e+09	6.90979e+07	1.02816e+07	5.46395e+06
PC(14:0p/18:1)pHCOO	PC	1.01825e+08	1.07797e+08	1.02356e+08	4.3122e+06	8.71383e+07	5.49649e+06	6.34847e+06	5.23033e+06	9.08675e+06
PC(14:0p/18:1)pHCOO	PC	382492	745182	1.52946e+06	1.78592e+06	1.09828e+06	4.38212e+06	351731	166584	215678
PC(16:0p/16:1)pHCOO	PC	9.18778e+07	1.72996e+08	2.21816e+08	1.78073e+08	1.48871e+08	1.17173e+06	1.61604e+08	1.96355e+07	1.80344e+08
PC(32:1p)pH	PC	2.08679e+09	1.91698e+09	2.51289e+09	2.30307e+09	1.78339e+09	6.05892e+07	2.17748e+09	1.17003e+09	2.14064e+09
PC(16:0p/16:1)pHCOO	PC	238186	246154	0	25481.4	2782.2	1.63827e+08	26901.9	166271	14389.5
PC(32:1p)pH	PC	0	0	0	0	0	2.15666e+09	396269	0	894027
PC(32:2)pCH3COO	PC	730003	4.05282e+06	4.57012e+06	2.98345e+06	55315.6	0	43100.5	254617	0
PC(32:2)pCH3COO	PC	0	31449.5	0	426.187	36244.6	2.97278e+06	0	0	7375.4
PC(16:1/16:1)pNa	PC	1.59341e+08	1.09361e+08	1.19803e+08	9.48586e+07	1.03357e+08	3.77052e+08	1.28957e+08	5.09863e+07	2.32287e+08
PC(16:1/16:1)pHCOO	PC	6.91982e+08	1.10311e+08	1.79775e+09	1.60414e+09	1.11756e+09	2.32319e+06	2.6928e+08	1.7503e+08	6.22067e+08
PC(32:2)pH	PC	2.44329e+10	1.56861e+10	3.06361e+10	2.67704e+10	1.97637e+10	8.12185e+08	5.47276e+09	7.42764e+09	1.53064e+10
PC(14:0/18:2)pHCOO	PC	2.6498e+07	3.17772e+07	7.85449e+07	2.52647e+06	8.95461e+07	283577	3.94115e+07	2.85818e+07	3.64336e+07
PC(16:1/16:1)pHCOO	PC	2.20496e+08	1.70983e+07	2.83663e+08	8.21637e+07	1.83048e+08	1.12308e+09	1.64903e+07	2.96696e+07	9.47867e+07
PC(32:2)pH	PC	9.83369e+08	9.97879e+08	1.17098e+09	1.46826e+09	1.21403e+09	2.91939e+10	7.01181e+08	3.34818e+08	7.45254e+08
PC(15:1/17:1)pH	PC	9.98232e+07	6.2594e+07	9.02546e+07	1.44183e+08	8.19367e+07	1.14667e+06	1.53312e+08	2.46587e+08	2.06664e+08
PC(16:1/16:2)pHCOO	PC	1.36459e+07	1.78236e+07	2.86198e+07	4.06151e+07	2.13958e+07	4.18646e+06	9.24649e+06	1.4646e+06	1.10086e+07
PC(32:3)pH	PC	2.2579e+08	1.77482e+08	6.59973e+08	5.80284e+08	2.95328e+08	6.52133e+07	1.24652e+08	4.84644e+07	4.15748e+08
PC(14:0/18:3)pHCOO	PC	3.19839e+07	7.04001e+06	4.99525e+07	3.90485e+07	2.59779e+07	9.42768e+06	9.24649e+06	1.193e+07	2.03414e+07
PC(32:3)pH	PC	2.37613e+08	2.96057e+08	1.28087e+09	4.06823e+08	2.11505e+08	1.87193e+08	7.35485e+07	9.17548e+07	4.0785e+08
PC(16:1/16:2)pHCOO	PC	3.28011e+07	2.40326e+07	5.07008e+07	4.48588e+07	5.23701e+07	4.38512e+07	3.26151e+07	8.95049e+06	3.47434e+07
PC(32:3)pH	PC	3.721e+08	3.92274e+08	5.53421e+08	7.33702e+07	8.32367e+07	9.45374e+08	5.76348e+07	1.59752e+08	2.70458e+08
PC(32:4)pH	PC	1.88628e+07	5.98692e+07	1.49737e+08	7.85023e+07	1.77874e+07	3.27788e+06	2.19092e+07	1.3534e+07	1.76812e+07
PC(32:4)pH	PC	3.77471e+07	6.8327e+07	9.61671e+07	8.81566e+07	4.53226e+07	2.09107e+07	1.94139e+07	1.809e+07	2.20108e+07
PC(32:4e)pH	PC	1.19975e+07	8.24876e+06	6.96226e+07	5.99224e+07	2.65448e+07	0	1.56625e+06	5.05342e+07	1.07935e+08
PC(32:4e)pHCOO	PC	579374	1.35254e+06	888125	1.41606e+06	201160	314483	1.08018e+06	1.48093e+06	4.61163e+06
PC(32:4e)pH	PC	410494	247783	132046	741.064	563524	7.52742e+07	7482.29	1.76954e+06	376723
PC(32:4p)pH	PC	16702.2	1.33209e+06	11454.3	2.64955e+06	2613.71	0	4.44032e+06	2.23061e+06	3.52484e+06
PC(32:4p)pH	PC	5.85864e+06	1.00513e+07	1.38789e+07	1.89288e+07	8.98133e+06	2.06563e+06	1.64953e+07	2.15191e+07	3.48042e+07
PC(32:4p)pH	PC	0	0	0	0	0	1.96801e+07	0	47313.8	0
PC(32:5)pH	PC	1.12359e+08	1.8991e+08	1.39959e+08	3.59069e+08	5.07e+07	678479	1.75106e+07	3.15104e+06	2.35659e+07
PC(32:5)pH	PC	1.06652e+06	842189	16992.8	404430	1.14873e+06	1.08798e+08	95413.8	304768	3656.95
PC(16:0/17:0)pHCOO	PC	1.63039e+07	6.86369e+06	6.49942e+07	4.93589e+06	2.67896e+07	0	6.21138e+06	5.44547e+06	8.7909e+06
PC(33:0)pH	PC	8.57407e+08	8.14336e+08	9.7691e+08	8.01431e+08	7.8916e+08	4.87303e+08	6.01373e+08	1.51175e+08	5.62777e+08
PC(33:0)pH	PC	3.38382e+08	3.65611e+06	4.38184e+08	2.02109e+08	1.49203e+07	5.65413e+08	8.64367e+07	8.3789e+06	2.43716e+08
PC(33:0e)pH	PC	7.04135e+07	4.77956e+07	5.97516e+07	8.76305e+07	5.55641e+07	575376	4.93594e+07	4.88593e+07	5.00583e+07
PC(33:0p)pH	PC	6.28737e+07	9.25183e+07	5.53767e+06	5.04929e+07	3.7494e+07	3.16669e+06	1.48092e+08	4.11149e+07	3.27952e+07
PC(17:1/16:0)pHCOO	PC	4.0115e+08	6.26805e+08	5.09502e+08	7.5078e+08	4.3467e+08	3.45844e+06	4.10503e+06	4.62336e+07	6.63871e+08
PC(17:1/16:0)pH	PC	9.16346e+09	9.87885e+09	1.31267e+10	1.19516e+10	6.33944e+08	4.4144e+08	1.0288e+10	8.25363e+09	1.06246e+10
PC(17:1/16:0)pHCOO	PC	1.24277e+07	3.57272e+07	2.53423e+07	9.08815e+07	7.13025e+07	4.74476e+08	1.03622e+07	8.50812e+06	3.53609e+07
PC(33:1)pH	PC	4.04713e+08	4.99374e+08	7.20965e+08	3.37187e+08	1.34786e+08	8.83604e+09	4.04428e+07	4.19135e+07	5.38884e+08
PC(15:1/18:0)pH	PC	1.09882e+10	1.06237e+10	1.1142e+10	1.07411e+10	9.5889e+09	1.0623e+07	7.35826e+09	7.15421e+09	7.57455e+09
PC(15:1/18:0)pH	PC	2.31438e+07	2.538e+07	2.01639e+07	3.33153e+07	1.69985e+07	2.61871e+07	6.72182e+06	2.21446e+06	5.71286e+06
PC(33:1p)pH	PC	1.15865e+08	1.21116e+08	1.58952e+08	1.25996e+08	829044	3.91713e+06	1.10799e+08	2.3622e+07	1.13568e+08
PC(33:1p)pH	PC	3.33833e+06	753354	7.17582e+06	3.62158e+06	4.89403e+06	14229.5	3.46283e+06	2.0237e+06	1.29639e+07
PC(33:1p)pH	PC	0	811030	0	16308.6	9854.34	1.03169e+08	3.11616e+06	448870	0
PC(17:1/16:1)pHCOO	PC	1.74353e+08	2.28696e+08	2.8217e+08	2.32905e+08	1.18267e+08	87979.9	3.35728e+07	7.73351e+07	1.43201e+08
PC(33:2)pH	PC	4.72181e+09	4.06131e+09	6.05487e+09	5.62689e+09	3.53431e+09	2.95931e+06	6.0548e+08	1.67775e+09	3.52407e+09
PC(17:1/16:1)pHCOO	PC	2.02942e+07	2.95203e+07	1.01037e+07	6.3773e+07	4.95309e+07	2.46238e+08	2.51155e+07	2.30347e+07	3.1477e+07
PC(33:2)pH	PC	6.36622e+06	8.5544e+06	4.99224e+06	1.26309e+07	1.49108e+06	5.62124e+09	2.69881e+07	7.18165e+06	5.59593e+06
PC(15:1/18:1)pH	PC	1.35966e+10	5.3629e+09	1.37005e+10	1.34914e+10	1.20155e+10	8.76371e+08	3.10071e+09	6.19018e+09	9.16378e+09
PC(15:1/18:1)pHCOO	PC	2.19597e+09	2.3261e+09	2.26508e+09	2.85902e+09	2.10798e+09	2.26779e+09	2.06744e+09	2.15711e+09	1.7489e+09
PC(16:0/17:2)pHCOO	PC	1.13253e+08	1.294e+08	7.24128e+06	1.35544e+08	1.59205e+08	1.58497e+09	6.1336e+07	1.14492e+08	5.09848e+07
PC(33:3)pH	PC	3.9337e+07	4.5968e+07	1.60966e+07	4.77112e+07	2.65566e+07	1.07249e+07	6.05686e+06	6.89637e+06	6.56576e+06
PC(15:2/18:1)pH	PC	2.78512e+09	1.73e+09	3.71884e+09	2.51645e+09	2.49448e+09	1.00176e+06	1.93976e+09	8.40523e+08	2.04734e+09
PC(15:2/18:1)pHCOO	PC	3.0026e+08	3.10668e+08	3.05997e+08	4.02706e+08	2.47851e+08	5.5463e+08	2.93787e+08	2.73054e+08	2.58509e+08
PC(33:3)pH	PC	2.14049e+07	3.45476e+07	3.64622e+06	4.26482e+07	5.65493e+07	3.35336e+09	9.41418e+06	6.30998e+06	2.28814e+07
PC(17:4/16:0)pH	PC	1.74559e+09	2.09301e+09	1.83686e+09	2.08583e+09	1.51422e+09	4.44493e+07	1.70722e+09	1.34651e+09	1.77012e+09
PC(33:4)pH	PC	1.40386e+07	6.06813e+06	1.32149e+07	1.04734e+06	0	1.97876e+09	0	6.81295e+06	7.98899e+06
PC(17:4/16:1)pH	PC	8.2592e+08	1.11583e+09	1.07048e+09	1.00177e+09	7.10224e+08	7.35477e+06	5.5585e+08	1.4344e+07	5.60093e+08
PC(33:5)pH	PC	4.9478e+08	4.53002e+08	6.05619e+08	5.55655e+08	3.02144e+08	4.75661e+07	5.01743e+07	2.13658e+08	3.48947e+08
PC(17:4/16:1)pH	PC	1.70113e+07	7.18954e+06	2.16216e+06	1.18164e+07	4.81115e+07	8.8018e+08	3.7779e+06	4.39894e+06	2.69529e+06
PC(17:4/16:2)pH	PC	9.88237e+07	4.33978e+06	1.4325e+08	1.59154e+08	1.23898e+07	1.03223e+06	1.1178e+07	2.98439e+07	4.28727e+07
PC(33:6)pH	PC	4.60081e+07	6.20529e+07	5.11864e+07	7.43449e+06	848815	639.467	2.72113e+07	2.97128e+07	1.14843e+07
PC(18:0/16:0)pHCOO	PC	8.41179e+08	7.94503e+08	8.78558e+08	6.39486e+08	7.57487e+08	5.7018e+07	2.77309e+08	2.57912e+08	3.30799e+08
PC(34:0)pH	PC	6.56282e+09	6.14301e+09	7.09096e+09	9.03725e+07	6.17431e+09	1.31736e+09	2.45999e+09	2.77332e+09	2.91793e+09
PC(18:0/16:0)pHCOO	PC	1.68306e+07	1.20261e+07	1.34576e+07	2.02186e+07	1.40571e+07	4.11339e+08	4.69058e+06	3.98473e+06	5.38771e+06
PC(34:0)pH	PC	1.04491e+08	1.47612e+08	6.69409e+07	4.17783e+07	1.5815e+08	2.78834e+09	9.52558e+07	3.23906e+07	4.64251e+07
PC(18:0e/16:0)pHCOO	PC	1.46235e+08	1.39285e+08	1.36698e+08	1.3955e+08	1.36866e+08	6.36063e+07	5.82247e+07	6.68077e+07	8.29791e+07
PC(34:0e)pH	PC	2.11251e+09	1.97775e+09	2.14541e+09	1.64347e+09	1.69519e+09	1.62376e+09	1.10006e+09	1.08889e+09	1.26534e+09
PC(18:0p/16:0)pHCOO	PC	1.38344e+09	4.73058e+08	1.49264e+09	1.24073e+09	1.17258e+09	547406	1.53116e+08	1.01481e+09	1.11601e+09
PC(18:0p/16:0)pHCOO	PC	4.38207e+07	4.30524e+07	1.85138e+06	5.54264e+07	3.89695e+07	1.0136e+09	1.68634e+07	1.48038e+07	3.41101e+06
PC(16:0/18:1)pHCOO	PC	1.07792e+10	9.21613e+09	1.1198e+10	1.12665e+10	1.00239e+10	1.21964e+08	5.09983e+09	2.661e+09	8.91497e+09
PC(16:0/18:1)pNa	PC	1.1553e+08	4.27637e+07	1.03264e+08	1.10119e+08	1.3979e+08	4.07368e+09	7.82114e+07	7.34331e+07	2.57317e+07
PC(34:1)pH	PC	7.98191e+10	6.95549e+10	8.58049e+10	8.07027e+10	7.15077e+10	3.04686e+09	3.28251e+10	4.84658e+10	6.51725e+10
PC(16:0/18:1)pHCOO	PC	5.09838e+07	1.21509e+07	2.32063e+07	9.43706e+07	4.79331e+07	8.12237e+09	2.4142e+07	5.37401e+07	6.47573e+07
PC(16:0/18:1)pNa	PC	2.62069e+07	5.40656e+06	6.3149e+07	3.82131e+06	7.01069e+06	1.41493e+07	6.2043e+06	1.7231e+07	7.8686e+07
PC(16:0/18:1)pCH3COO	PC	3.15798e+08	1.75938e+08	3.11295e+08	2.18844e+08	3.51315e+08	1.26614e+08	1.50496e+08	4.37018e+08	4.04219e+08
PC(34:1)pH	PC	4.11242e+09	4.33973e+08	3.07109e+09	7.16256e+09	1.09626e+10	6.33698e+10	6.12049e+09	2.4737e+09	2.00591e+09
PC(34:1e)pH	PC	1.37779e+10	4.0269e+09	1.60411e+10	1.45677e+10	1.24087e+10	8.17978e+08	1.20736e+10	1.60683e+09	1.41322e+10
PC(34:1e)pH	PC	7.31629e+06	1.42573e+08	3.91323e+08	3.52427e+07	1.29161e+08	1.00309e+10	6.77493e+07	1.02097e+07	1.60214e+07
PC(18:0p/16:1)pHCOO	PC	7.88181e+07	1.28987e+08	1.2656e+08	8.10391e+07	5.61078e+07	0	8.22956e+07	6.99428e+07	1.09341e+08
PC(16:0p/18:1)pHCOO	PC	3.72705e+08	3.11354e+08	3.94293e+08	2.91056e+08	5.60145e+06	1.99717e+07	7.26112e+07	3.40954e+08	3.80559e+08
PC(16:0p/18:1)pCH3COO	PC	785929	1.95995e+06	2.1779e+06	1.39264e+06	373337	0	192098	276675	2.26133e+06
PC(14:0p/20:1)pH	PC	8.90703e+07	1.31095e+07	1.05947e+08	5.82375e+07	1.94082e+07	7.42812e+06	1.70336e+07	5.91764e+07	5.76473e+07
PC(16:0/18:2)pHCOO	PC	4.68402e+09	5.87329e+08	5.22442e+09	5.09842e+09	2.20277e+09	4.35169e+08	1.87412e+09	2.86213e+08	1.75614e+09
PC(34:2)pH	PC	4.40719e+10	3.42348e+10	4.77748e+10	4.44725e+10	3.73893e+10	1.19059e+10	3.71911e+10	2.92688e+10	3.73843e+10
PC(16:1/18:1)pHCOO	PC	1.72327e+07	1.27304e+07	1.00415e+08	1.8596e+08	2.1449e+08	4.73737e+09	1.41639e+08	4.94779e+07	6.49871e+07
PC(34:2)pH	PC	1.24622e+09	1.54281e+09	1.34136e+09	2.48416e+09	3.1459e+09	4.22805e+10	2.65586e+09	1.00893e+09	1.05198e+09
PC(18:0/16:2)pHCOO	PC	9.8122e+06	6.81715e+06	3.46417e+07	4.10424e+07	2.3273e+07	519009	2.89788e+06	1.37314e+07	2.22843e+07
PC(34:2)pH	PC	4.02591e+08	1.76309e+08	3.26076e+08	3.82065e+08	4.58035e+06	80169.4	2.06832e+08	1.0023e+08	2.69965e+08
PC(16:1/18:1)pCH3COO	PC	7.40452e+06	5.39157e+06	2.31114e+06	6.15808e+06	8.26739e+06	9.7655e+06	4.13127e+06	2.26998e+06	2.01264e+06
PC(16:0e/18:2)pHCOO	PC	3.82004e+07	1.23168e+08	3.72062e+07	1.07206e+08	5.83755e+07	0	6.80284e+07	7.61168e+07	1.14402e+08
PC(34:2e)pH	PC	4.3531e+09	3.67611e+09	4.69146e+09	4.07126e+09	3.9034e+09	6.82855e+08	4.03506e+09	3.64028e+09	4.79539e+09
PC(34:2e)pH	PC	3.62202e+06	6.32113e+06	6.91348e+06	3.18476e+06	1.56621e+06	3.34463e+09	3.80434e+06	2.91711e+06	9.64716e+06
PC(16:1/18:2)pHCOO	PC	5.43328e+08	3.96411e+08	3.15653e+08	6.09131e+08	4.02625e+08	3.71536e+08	3.89341e+07	8.63213e+07	3.37387e+08
PC(34:3)pH	PC	1.1264e+10	1.43573e+10	1.43572e+10	1.01187e+10	8.90893e+09	1.89296e+07	4.19989e+09	1.96358e+09	8.88088e+09
PC(16:1/18:2)pHCOO	PC	3.89628e+06	2.20674e+07	2.43587e+07	74159800	5.48778e+07	5.78284e+08	5.60447e+06	1.98829e+07	1.86025e+06
PC(34:3)pH	PC	4.0835e+08	1.97485e+06	5.00201e+06	8.16192e+08	8.63392e+06	1.32844e+10	6.48159e+08	4.46014e+08	2.62811e+06
PC(16:2/18:1)pH	PC	8.27219e+06	2.13087e+07	1.19015e+07	1.06627e+07	2.32128e+07	1.53856e+06	7.34162e+06	9.79536e+06	3.44855e+06
PC(16:1/18:3)pHCOO	PC	2.07035e+07	1.3461e+07	1.60166e+07	3.05054e+07	1.19886e+07	546901	2.94379e+06	1.84809e+06	9.11541e+06
PC(34:4)pH	PC	1.31523e+08	1.81126e+08	8.92674e+08	7.83006e+08	1.80542e+08	5.47421e+06	9.68386e+07	6.07769e+07	2.10447e+08
PC(14:0/20:4)pHCOO	PC	9.04482e+07	7.51209e+07	1.0134e+08	9.68835e+07	7.23437e+07	1.67378e+06	1.12912e+08	1.03226e+08	1.12153e+08
PC(34:4)pH	PC	1.07856e+09	9.63427e+08	1.21851e+09	1.08975e+09	8.0756e+08	3.48122e+07	2.17379e+09	1.72499e+09	2.19149e+09
PC(34:4)pH	PC	1.45849e+07	2.8471e+07	7.38926e+07	1.39749e+08	8.38721e+06	2.8216e+08	1.50634e+07	6.68848e+06	9.38607e+07
PC(14:0/20:4)pHCOO	PC	150726	187148	388571	376258	151518	6.18355e+06	291751	5485.87	223412
PC(18:4/16:0)pH	PC	1.25388e+07	3.66525e+06	4.09927e+06	2.87248e+06	2.52142e+07	7.43353e+07	6.34429e+06	1.39103e+07	9.48454e+06
PC(34:4p)pHCOO	PC	1.92884e+07	4.46268e+07	3.12618e+07	2.70038e+07	1.76696e+07	869858	2.75977e+06	1.93515e+06	6.04023e+06
PC(34:4p)pHCOO	PC	219983	1.34357e+06	4.76891e+06	4.66414e+06	739855	5.64877e+06	1.65411e+06	1.45757e+06	2.19548e+06
PC(14:0p/20:4)pHCOO	PC	2.73137e+06	2.14049e+06	2.19413e+06	3.45455e+06	2.2099e+06	2.36578e+06	631981	1.2254e+06	2.23345e+06
PC(34:4p)pH	PC	2.98197e+07	3.15008e+07	1.30072e+07	3.30961e+07	1.42392e+07	1.11446e+07	1.75331e+07	1.15706e+07	4.14411e+07
PC(34:4p)pH	PC	2.20932e+07	1.74251e+07	3.61112e+07	1.30926e+08	5.10104e+07	262401	2.93409e+07	2.24357e+07	5.94063e+07
PC(14:0/20:5)pHCOO	PC	6.88893e+06	5.89565e+06	1.50724e+07	1.24741e+07	6.05915e+06	1.69514e+06	8.46601e+06	1.69618e+06	1.21093e+07
PC(34:5)pH	PC	1.20899e+08	1.85815e+08	3.35423e+08	3.25587e+08	1.48424e+08	887016	2.02721e+08	4.75512e+07	2.7168e+08
PC(14:0/20:5)pHCOO	PC	6.10566e+06	4.22801e+06	7.33875e+06	1.25939e+06	1.96335e+06	9.37399e+06	2.48349e+06	5.52127e+06	2.04835e+06
PC(34:5)pH	PC	1.0612e+08	1.28722e+08	1.27452e+08	4.09375e+07	906354	2.74584e+08	5.23573e+07	5.39935e+07	1.92543e+08
PC(17:4/17:1)pH	PC	4.61659e+07	2.67828e+07	3.1296e+07	1.98121e+07	2.63835e+07	5.88257e+07	5.02285e+07	1.59782e+07	5.20113e+07
PC(17:4/17:1)pH	PC	0	0	0	0	0	2.54676e+07	0	44522.8	0
PC(34:6e)pH	PC	913889	1.15431e+07	9.23112e+06	1.04886e+07	5.02754e+06	62362.3	1.11635e+07	3.68903e+06	2.29628e+07
PC(34:6e)pH	PC	875518	1.46713e+06	3.47959e+06	1.42289e+06	343399	257809	945616	1.60137e+06	1.22553e+07
PC(34:6p)pH	PC	1.68125e+06	1.60793e+06	2.55291e+06	1.58269e+06	569766	31257.4	8.87769e+06	9.79706e+06	1.05986e+07
PC(35:0)pH	PC	1.83474e+08	1.68987e+08	1.8807e+08	1.58133e+08	1.91971e+08	4.60002e+07	1.5597e+08	1.60422e+08	1.5307e+08
PC(35:0p)pH	PC	3.63488e+07	3.85515e+07	4.18149e+07	4.17417e+07	4.21938e+07	1.95542e+08	1.91163e+07	1.20675e+07	1.46795e+07
PC(17:0/18:1)pHCOO	PC	1.92628e+08	1.10837e+08	2.32951e+08	2.18844e+08	1.67957e+08	8.2761e+07	9.77929e+07	1.03213e+08	1.38312e+08
PC(35:1)pH	PC	3.99919e+09	4.61521e+08	4.66121e+09	2.69071e+09	2.14196e+09	8.73498e+08	1.59879e+09	3.99807e+09	5.06597e+09
PC(17:0/18:1)pHCOO	PC	6.58106e+07	2.57252e+07	6.74565e+07	1.90844e+08	3.83119e+08	1.76193e+08	1.79607e+08	1.07811e+08	7.19119e+07
PC(35:1)pH	PC	4.06868e+09	3.82669e+09	4.75042e+09	3.77632e+09	4.02718e+09	1.82186e+09	4.67059e+09	4.08836e+09	5.06201e+09
PC(35:1)pH	PC	3.07427e+08	8.26232e+07	9.97793e+07	5.1381e+08	7.40666e+08	3.15247e+09	7.5017e+08	8.67069e+07	2.65899e+08
PC(17:1/18:0)pH	PC	4.6449e+08	5.00834e+08	4.53235e+08	4.60178e+08	3.95835e+08	3.57863e+06	3.03707e+08	2.58108e+08	2.98562e+08
PC(35:1p)pH	PC	7.38335e+07	9.22547e+07	1.19746e+08	6.81965e+07	1.00052e+08	4.85764e+06	6.75016e+07	1.07898e+08	2.25488e+08
PC(35:1p)pH	PC	2.59839e+06	3.52994e+07	2.08452e+07	1.11497e+07	4.5069e+07	5.95594e+07	2.15373e+06	2.96941e+06	6.74031e+07
PC(17:1/18:1)pHCOO	PC	5.83769e+08	5.74953e+08	9.56217e+08	8.59453e+08	6.5822e+08	287702	6.09094e+08	5.85983e+08	6.59924e+08
PC(35:2)pH	PC	8.30383e+09	5.27403e+09	1.01176e+10	8.38979e+09	7.8414e+09	1.22309e+08	7.47062e+09	4.08517e+09	7.78762e+09
PC(16:0/19:2)pHCOO	PC	4.95389e+07	7.21632e+08	9.57113e+08	8.6354e+08	6.50615e+08	287702	6.1183e+08	1.26298e+08	6.6939e+08
PC(17:1/18:1)pHCOO	PC	1.36998e+06	4.10914e+06	732223	1.49062e+06	1.65328e+06	8.62817e+08	6.66972e+06	3.57326e+06	1.84104e+06
PC(35:2)pH	PC	4.77073e+07	5.6826e+07	4.77522e+07	9.02078e+07	2.10612e+08	8.69001e+09	1.17733e+08	2.41415e+07	5.27786e+07
PC(17:1/18:2)pHCOO	PC	3.61311e+07	3.01383e+07	5.73658e+07	5.12287e+07	4.07606e+07	56144	2.86955e+07	1.32549e+07	4.35428e+07
PC(35:3)pH	PC	7.76238e+08	5.80922e+08	9.37123e+08	9.20791e+08	6.54481e+08	1.33883e+06	7.02617e+08	2.32256e+08	9.91235e+08
PC(17:1/18:2)pHCOO	PC	765121	1.09109e+06	587827	0	284105	6.5904e+07	597316	293240	429622
PC(35:3)pH	PC	1.61568e+07	6.20072e+07	2.63152e+06	5.39804e+07	2.75747e+07	8.64736e+08	4.78704e+07	1.01257e+07	2.51447e+07
PC(18:1/17:2)pH	PC	9.86194e+08	6.12448e+08	9.04645e+08	4.40413e+08	5.39678e+08	3.17733e+07	5.4394e+08	6.03796e+08	7.6643e+08
PC(18:1/17:2)pHCOO	PC	4.83059e+07	4.94239e+07	4.75641e+07	5.82207e+07	5.32719e+07	1.27294e+07	5.94764e+07	3.85764e+07	4.0509e+07
PC(18:0/17:3)pH	PC	1.02065e+09	6.90356e+08	2.70689e+08	1.00669e+09	8.87976e+08	1.01316e+09	1.4098e+08	1.81739e+08	2.04728e+08
PC(18:0/17:3)pHCOO	PC	7.37776e+06	1.03639e+07	589600	1.86155e+06	2.21146e+07	4.82251e+07	4.39547e+06	555903	1.22311e+06
PC(15:0/20:4)pHCOO	PC	1.40813e+07	3.85134e+06	1.62374e+07	9.77843e+06	7.51122e+06	0	8.90659e+06	1.46849e+07	1.54444e+07
PC(35:4)pH	PC	3.96926e+08	3.29481e+08	4.06891e+08	3.92797e+08	5.21494e+07	2.40624e+06	4.70425e+08	7.04138e+07	5.03055e+08
PC(18:1/17:3)pH	PC	6.51708e+07	8.30866e+07	4.64882e+08	5.57857e+08	5.44819e+08	3.70453e+08	1.82786e+08	4.47674e+06	5.32561e+08
PC(17:4/18:0)pH	PC	4.48876e+09	2.94775e+09	4.33617e+09	3.80466e+09	3.94115e+09	5.25574e+08	6.25155e+08	3.42031e+09	4.88303e+09
PC(35:4)pH	PC	4.84357e+07	1.12337e+08	1.54985e+07	2.4314e+08	6.39088e+08	3.02537e+09	1.43694e+08	1.24014e+07	2.97969e+06
PC(35:5)pH	PC	5.47404e+07	3.88549e+07	7.13868e+07	2.83223e+07	1.87937e+07	1.09003e+07	2.71072e+06	9.54724e+06	2.10787e+07
PC(35:5)pH	PC	7.36362e+07	7.76966e+07	4.15172e+06	2.78355e+06	1.08535e+06	4.69345e+07	1.21052e+06	1.52395e+07	2.17966e+06
PC(17:4/18:1)pH	PC	4.72467e+09	5.1226e+09	5.75639e+09	6.0999e+09	4.73874e+09	8.20483e+07	4.74239e+09	3.81852e+09	5.5409e+09
PC(17:4/18:1)pH	PC	1.31269e+09	1.02898e+09	1.43538e+09	1.51799e+09	1.00172e+09	4.9567e+07	9.40784e+08	7.09695e+08	9.40756e+08
PC(17:4/18:1)pH	PC	1.88422e+06	3.19861e+06	2.52491e+06	1.43459e+07	6.66938e+07	5.27106e+09	1.37825e+07	1.04239e+06	1.32332e+06
PC(16:1/19:5)pH	PC	3.85921e+08	4.60335e+08	4.55807e+08	7.08038e+08	2.10461e+08	199587	1.51147e+08	7.88687e+07	2.3948e+08
PC(17:4/18:2)pH	PC	1.60834e+09	9.92428e+08	1.56108e+09	1.47454e+09	7.23453e+08	3.23139e+07	3.37888e+08	5.45579e+08	9.49473e+08
PC(16:1/19:5)pH	PC	5.95915e+08	5.18006e+08	6.32076e+08	6.46141e+08	5.05493e+08	3.26543e+08	3.2764e+08	3.2482e+08	3.94364e+08
PC(35:6)pH	PC	5.8149e+08	5.13048e+08	5.12725e+08	6.48387e+08	5.27297e+08	1.44121e+09	1.51848e+07	8.15518e+06	3.59185e+08
PC(35:7)pH	PC	3.79081e+08	1.78216e+08	3.50561e+08	3.66207e+08	1.84746e+08	295630	1.59184e+08	1.06548e+08	1.70182e+08
PC(20:0/16:0)pHCOO	PC	6.34422e+07	7.01423e+07	9.06217e+07	6.7445e+07	7.09097e+07	4.97176e+07	3.44404e+07	3.43241e+07	3.1149e+07
PC(36:0)pH	PC	7.56114e+08	6.15549e+08	6.72189e+08	7.30668e+08	4.58461e+08	4.07098e+07	3.25224e+08	3.07573e+08	3.52339e+08
PC(20:0e/16:0)pHCOO	PC	1.86049e+07	3.03503e+07	2.44676e+07	2.35071e+07	2.29186e+07	2.22122e+07	8.893e+06	1.09109e+07	8.19522e+06
PC(36:0e)pH	PC	2.83969e+08	2.7084e+08	3.57037e+08	2.90792e+08	2.06026e+08	2.49775e+08	1.56131e+08	1.40791e+08	1.45458e+08
PC(20:0p/16:0)pHCOO	PC	7.31705e+06	7.09154e+06	2.45333e+07	1.18318e+07	3.44605e+07	9.15296e+07	3.48804e+07	1.02326e+07	1.50423e+07
PC(18:0/18:1)pHCOO	PC	4.14424e+09	4.04903e+09	4.52275e+09	3.84323e+09	3.77018e+09	2.75107e+08	3.41049e+09	3.70842e+09	3.84255e+09
PC(18:0/18:1)pNa	PC	5.0423e+07	1.21867e+07	1.07181e+08	1.8157e+07	3.22221e+07	5.53877e+08	9.23097e+07	1.89297e+08	1.51577e+08
PC(36:1)pH	PC	3.40105e+10	3.47129e+10	3.71584e+10	3.13516e+10	3.16041e+10	1.86552e+10	3.16673e+10	3.4183e+10	3.64193e+10
PC(18:0/18:1)pHCOO	PC	1.02028e+08	1.24108e+08	8.16576e+07	2.59126e+08	4.08114e+08	1.9432e+09	3.71233e+08	1.12555e+08	1.89149e+07
PC(36:1)pH	PC	3.49365e+10	3.26294e+10	3.83693e+10	3.23109e+10	3.21702e+10	1.47392e+10	3.20154e+10	3.43477e+10	3.68002e+10
PC(18:0e/18:1)pHCOO	PC	1.77244e+08	1.69341e+08	1.90059e+08	1.63507e+08	1.69666e+08	9.15296e+07	1.56609e+08	1.50992e+08	1.63746e+08
PC(36:1e)pH	PC	2.3675e+09	2.14133e+09	2.36451e+09	1.33003e+09	1.72551e+09	1.24397e+09	2.25593e+09	2.05064e+09	2.40197e+09
PC(18:0e/18:1)pHCOO	PC	1.31344e+07	1.01451e+07	1.93347e+07	1.50251e+07	1.73134e+07	9.27225e+07	1.19088e+07	1.04777e+07	1.90235e+07
PC(36:1e)pH	PC	8.97944e+07	9.77057e+07	1.12786e+08	7.12244e+07	9.60525e+08	1.52693e+09	6.42459e+08	6.59738e+07	3.42226e+08
PC(20:1p/16:0)pH	PC	1.32283e+09	5.54102e+08	1.62332e+09	1.57854e+09	1.35942e+09	8.52816e+07	1.90462e+09	1.02606e+09	2.10567e+09
PC(16:0p/20:1)pHCOO	PC	1.6451e+08	1.45571e+08	1.40258e+08	1.56432e+08	1.41713e+08	4.40303e+06	1.07879e+08	1.01412e+08	1.19957e+08
PC(36:1p)pH	PC	2.00651e+09	1.83764e+09	2.17567e+09	1.30305e+09	1.35181e+09	5.81737e+08	1.35834e+09	1.42054e+09	1.7926e+09
PC(16:0p/20:1)pHCOO	PC	6772.93	1.45369e+06	717193	307028	425378	7.38776e+07	1.03862e+06	919716	823524
PC(14:0p/22:1)pH	PC	6.73212e+06	5.87687e+06	1.88524e+06	4.66501e+07	4.19264e+07	5.5259e+07	1.67806e+06	123168	2.8968e+06
PC(18:1/18:1)pH	PC	1.94407e+06	8.50204e+06	3.03654e+06	2.84061e+06	1.13001e+06	272727	3.81538e+06	2.87403e+06	715164
PC(18:1/18:1)pH	PC	1.22771e+07	2.99866e+07	3.48523e+07	1.0354e+08	4.95339e+07	2.42339e+07	5.63245e+07	9.86938e+06	2.66486e+07
PC(18:1/18:1)pHCOO	PC	5.63278e+09	4.47578e+09	6.18449e+09	6.02007e+09	5.5296e+09	1.06066e+09	4.6275e+09	3.51736e+09	5.82547e+09
PC(36:2)pH	PC	4.55185e+10	4.04006e+10	4.80946e+10	4.84224e+10	4.32664e+10	8.99601e+09	1.45955e+10	1.05339e+10	4.89403e+10
PC(18:1/18:1)pHCOO	PC	8.83557e+06	8.80521e+06	6.83849e+07	1.24072e+08	1.17045e+08	4.25151e+09	3.1674e+07	2.06056e+07	8.48562e+07
PC(36:2)pH	PC	1.38583e+09	1.58827e+09	1.03525e+09	3.27775e+09	4.82842e+09	3.63921e+10	3.91053e+09	7.55251e+07	1.34493e+09
PC(18:1/18:1)pCH3COO	PC	5.54984e+07	7.09374e+07	2.01266e+07	7.9985e+07	6.26007e+07	6.24908e+07	7.34049e+07	6.98921e+07	4.39317e+07
PC(16:0e/20:2)pHCOO	PC	1.37924e+08	4.39214e+07	1.59023e+08	1.4105e+08	1.385e+08	9.35319e+06	9.45622e+07	1.54171e+08	1.85489e+08
PC(36:2e)pH	PC	1.95451e+09	1.87312e+09	2.24408e+09	1.36774e+09	1.52372e+09	1.41361e+09	1.48698e+09	1.50822e+09	1.7926e+09
PC(36:2e)pHCOO	PC	1.39085e+08	1.65119e+08	1.38044e+08	1.47941e+08	1.07698e+08	4.25407e+06	7.46771e+07	4.2438e+06	1.3426e+08
PC(18:2p/18:0)pHCOO	PC	8.43509e+06	7.80882e+06	1.35946e+07	6.88376e+06	1.14934e+07	0	1.84151e+07	2.62946e+07	3.02084e+07
PC(18:1p/18:1)pHCOO	PC	1.26143e+08	8.60035e+07	1.34588e+08	7.83052e+07	1.16795e+08	1.15457e+07	2.11498e+07	8.08282e+07	7.9455e+07
PC(18:1p/18:1)pHCOO	PC	415068	528854	444160	939320	2.08781e+06	8.9936e+07	573940	50925.7	1942.46
PC(18:1/18:2)pHCOO	PC	1.20842e+09	8.49059e+08	1.39621e+09	2.03999e+09	1.01486e+09	1.02845e+09	1.56932e+09	5.84768e+08	1.84164e+09
PC(36:3)pH	PC	2.09329e+10	1.42529e+10	2.36596e+10	2.23509e+10	1.56079e+10	3.64233e+08	1.80432e+10	1.03152e+10	2.0387e+10
PC(16:0/20:3)pHCOO	PC	675806217	3.82178e+08	7.47342e+08	2.05022e+09	4.42902e+08	9.65534e+08	1.42833e+09	2.91478e+07	8.56849e+07
PC(18:1/18:2)pHCOO	PC	1.11104e+08	1.23963e+08	2.12633e+08	1.60587e+08	1.67033e+08	2.02297e+09	1.32925e+08	8.31885e+07	511246
PC(36:3)pH	PC	1.47514e+09	2.00968e+09	1.77571e+06	2.51398e+09	2.61093e+09	2.25965e+10	1.81486e+09	1.3778e+09	1568621366
PC(18:2p/18:1)pH	PC	1.73638e+09	3.05817e+08	2.1555e+09	1.8693e+09	1.37308e+09	2.6208e+06	4.32901e+09	8.23324e+08	4.84277e+09
PC(36:3p)pCH3COO	PC	2.78666e+06	433186	7.00908e+06	2.34633e+06	141261	0	359801	11941.5	18008.8
PC(18:1/18:3)pH	PC	4.94158e+06	1.94704e+07	2.53801e+07	3.70141e+07	1.54891e+07	2.50823e+06	7.88294e+06	1.92884e+07	1.41766e+07
PC(18:1/18:3)pHCOO	PC	2.10319e+08	1.56866e+08	4.27425e+08	2.61597e+08	1.61072e+08	2.13255e+07	2.01631e+07	6.60842e+07	2.40713e+08
PC(36:4)pH	PC	4.78289e+09	5.27127e+09	6.97807e+09	5.34603e+09	3.90199e+09	3.10568e+08	2.73101e+09	1.3898e+09	3.63682e+09
PC(16:0/20:4)pHCOO	PC	5.13572e+08	3.00714e+08	5.24312e+08	4.53205e+08	3.25774e+08	2.06944e+08	6.11539e+08	3.67576e+08	6.20219e+08
PC(36:4)pH	PC	3.68959e+09	3.75795e+09	4.67275e+09	4.69257e+09	3.29767e+09	3.94428e+08	5.86648e+09	5.41603e+09	6.91264e+09
PC(16:0/20:4)pHCOO	PC	546520	2.6918e+07	1.78731e+07	5.15688e+07	7.22664e+07	1.0667e+08	9.48005e+07	2.76951e+07	2.67881e+07
PC(18:2/18:2)pCH3COO	PC	5.6063e+06	9.78608e+06	1.31416e+07	1.52975e+07	9.63732e+06	7.87964e+06	3.65342e+06	2.11162e+07	9.97082e+06
PC(16:0e/20:4)pHCOO	PC	1.00432e+08	9.62653e+07	1.50643e+08	1.52983e+08	9.817e+07	0	2.47922e+08	1.89505e+08	2.69222e+08
PC(36:4e)pH	PC	1.73638e+09	9.73714e+08	2.1555e+09	1.8693e+09	1.37308e+09	2.66762e+06	4.2269e+09	9.14979e+08	4.6766e+09
PC(16:0e/20:4)pHCOO	PC	1.76677e+06	1.73068e+06	1.89572e+06	3.66614e+06	1.48268e+06	1.45614e+08	6.01512e+06	666814	4.61192e+06
PC(36:4p)pHCOO	PC	5.97317e+06	4.62643e+06	9.616e+06	7.14388e+06	172389	2.13962e+06	28725.9	3748.01	305933
PC(36:4p)pH	PC	4.88678e+06	2.60718e+06	1.95047e+06	5.00192e+06	1.23747e+06	1.09822e+06	7.04171e+07	3.66152e+07	7.18857e+07
PC(16:0p/20:4)pHCOO	PC	1.25866e+08	1.48952e+08	1.25563e+08	1.2186e+08	1.06367e+08	309157	3.2689e+08	1.6074e+08	3.55561e+08
PC(16:0p/20:4)pCH3COO	PC	4.88557e+06	171715	283717	365733	2.99968e+06	0	249548	122292	1.07869e+07
PC(36:4p)pH	PC	1.36203e+09	9.18495e+08	1.51857e+09	1.48502e+09	9.62025e+08	7.63136e+06	3.9431e+09	2.45631e+09	4.13712e+09
PC(16:0p/20:4)pCH3COO	PC	2.39041e+06	1.51765e+06	7.06625e+06	1.34554e+06	2.81249e+06	0	6.67368e+06	8.38361e+06	1.06839e+07
PC(16:0p/20:4)pHCOO	PC	0	0	0	454612	0	1.31092e+08	0	0	0
PC(16:0p/20:4)pCH3COO	PC	0	225713	0	446446	0	3.94388e+06	0	113978	0
PC(36:4p)pH	PC	0	453236	0	447771	0	1.44257e+09	414383	1.2004e+06	1.27376e+06
PC(16:1/20:4)pHCOO	PC	1.67802e+08	1.83614e+08	2.09718e+08	1.82525e+08	1.27615e+08	1.61454e+06	1.32502e+08	5.74824e+07	1.40681e+08
PC(16:1/20:4)pNa	PC	3.64957e+06	7.80194e+06	3.45303e+06	5.66175e+06	1.54223e+07	1.12017e+07	2.18587e+07	1.51391e+07	4.1369e+07
PC(36:5)pH	PC	3.43779e+09	2.94384e+09	4.32605e+09	3.64716e+09	2.45913e+09	4.68902e+07	3.67901e+09	1.20613e+09	4.09935e+09
PC(16:0/20:5)pHCOO	PC	6.86639e+07	2.2601e+07	1.9098e+08	1.63162e+08	1.17172e+08	1.40203e+08	1.56596e+08	8.96734e+07	1.46656e+08
PC(16:0/20:5)pNa	PC	4.28444e+07	3.48243e+07	3.00014e+07	3.87247e+07	2.99104e+07	2.39088e+06	5.42267e+07	2.38834e+07	9.20348e+07
PC(36:5)pH	PC	2.94602e+09	3.17609e+09	3.68161e+09	3.36921e+09	2.30931e+09	1.36394e+08	3.12795e+09	2.55382e+09	4.06915e+09
PC(16:1/20:4)pHCOO	PC	1.36503e+08	1.19233e+08	4.51385e+06	2.07788e+06	1.24548e+08	1.95529e+08	1.6476e+08	1.25337e+08	1.65261e+08
PC(16:0/20:5)pNa	PC	0	0	0	0	0	7.55697e+06	0	0	0
PC(36:5)pH	PC	4.7141e+07	7.48499e+06	2.99856e+07	1.08608e+07	5.70347e+06	3.18179e+09	2.73986e+07	2.70643e+06	1.61455e+07
PC(17:4/19:1)pH	PC	1.06333e+08	2.77381e+07	3.278e+06	1.02959e+08	8.88111e+07	3.59783e+07	2.2115e+07	7.04023e+07	6.47221e+07
PC(36:5p)pHCOO	PC	2.01071e+06	1.54026e+06	1.25355e+06	3.52698e+06	340217	2.7402e+07	36229.4	266476	316213
PC(16:1p/20:4)pHCOO	PC	5.41736e+06	1.20588e+06	6.79069e+06	2.07438e+06	375978	2.79301e+06	2.09185e+06	1.82488e+06	3.59868e+06
PC(36:5p)pH	PC	3.73284e+07	2.8238e+07	3.17649e+07	3.2387e+07	2.86145e+07	5.7483e+06	6.83086e+07	2.43861e+07	8.45539e+07
PC(16:0p/20:5)pHCOO	PC	8.61831e+06	2.92088e+06	1.30121e+07	1.18496e+07	682628	61481	1.05418e+07	1.83717e+07	2.39399e+07
PC(36:5p)pH	PC	1.88073e+08	1.53231e+08	1.89266e+08	2.11767e+08	1.61753e+08	5.53587e+06	5.37553e+08	1.53077e+08	5.33597e+08
PC(16:0p/20:5)pHCOO	PC	0	97218.4	0	220094	242047	8.27342e+06	1.53672e+06	360785	0
PC(36:5p)pH	PC	0	0	0	0	0	1.53678e+08	0	0	0
PC(16:1p/20:4)pCH3COO	PC	1.02838e+06	4.08319e+06	1.75763e+06	1.19041e+07	2.36048e+06	36076.6	1.71259e+06	558156	12619.7
PC(16:1/20:5)pHCOO	PC	2.65464e+07	1.88712e+07	4.09235e+07	4.22707e+07	1.74467e+07	305122	2.32133e+07	2.1071e+07	3.79961e+07
PC(36:6)pH	PC	2.91917e+08	4.41173e+08	9.9717e+08	8.21394e+08	3.86211e+08	1.43987e+06	4.79576e+08	2.69056e+08	4.59444e+08
PC(36:6)pH	PC	7.02934e+08	1.08776e+09	1.50662e+09	1.30436e+09	6.60517e+08	1.0389e+07	6.11125e+08	1.28773e+08	8.4717e+08
PC(16:1/20:5)pHCOO	PC	4.39479e+07	3.97799e+07	1.00156e+07	1.71658e+07	1.15431e+07	2.73877e+07	2.13897e+07	3.68212e+07	8.98065e+07
PC(36:6)pH	PC	5.84554e+07	6.38434e+07	4.76209e+07	7.15219e+07	5.47491e+07	1.26807e+09	5.21543e+07	3.28875e+07	5.37681e+07
PC(36:7)pH	PC	1.51164e+06	608924	2.37122e+06	899023	1.9764e+06	3.97867e+06	2.91761e+07	2.37017e+07	3.617e+07
PC(36:7)pH	PC	7.07643e+07	8.38129e+06	8.90615e+07	3.25875e+06	2.10111e+07	1.53159e+06	7.26182e+06	2.30772e+07	4.77352e+07
PC(36:7)pH	PC	0	0	0	0	0	6.46714e+07	0	0	0
PC(17:0/20:1)pHCOO	PC	1.34333e+07	2.11313e+07	7.88485e+07	1.20694e+07	7.50885e+06	5.97443e+06	2.10807e+07	6.57736e+07	2.10948e+07
PC(37:1)pH	PC	1.46104e+09	1.43105e+09	1.58841e+09	1.10553e+09	9.33147e+08	3.19225e+08	1.17468e+09	8.98693e+08	3.18551e+08
PC(37:1)pH	PC	2.76156e+08	3.16242e+08	2.03993e+08	3.87856e+08	3.18507e+08	2.21461e+08	1.78861e+08	1.89168e+08	1.73551e+08
PC(19:1/18:1)pHCOO	PC	2.2026e+08	1.55645e+08	2.45692e+08	2.2087e+08	2.15507e+08	2.70305e+06	8.56194e+07	2.4518e+08	2.82524e+08
PC(37:2)pH	PC	2.91799e+09	1.99021e+09	3.14504e+09	2.48353e+09	2.48077e+09	9.85567e+08	2.97192e+09	2.40269e+09	3.38871e+09
PC(19:1/18:1)pHCOO	PC	4.862e+06	7.29801e+06	7.7285e+06	1.56963e+07	4.06086e+06	2.8738e+06	7.36656e+06	1.08806e+07	6.06298e+06
PC(37:2)pH	PC	1.32845e+07	8.89276e+06	1.706e+06	1.59422e+08	2.36375e+08	2.06436e+09	6.26054e+06	7.06897e+06	1.90716e+07
PC(19:1/18:1)pH	PC	8.05118e+08	6.44319e+08	7.7156e+08	4.73413e+08	7.10393e+08	4.20919e+08	5.16834e+08	5.42292e+08	5.33534e+08
PC(18:1/19:2)pHCOO	PC	1.49141e+08	3.97365e+07	1.06029e+08	6.83199e+07	4.47124e+07	425110	7.00584e+07	2.8656e+07	8.32381e+07
PC(37:3)pH	PC	4.94634e+08	4.98458e+08	8.15008e+08	9.28992e+08	6.93013e+08	866859	7.07406e+08	4.81062e+08	1.28094e+09
PC(18:1/19:2)pHCOO	PC	0	410279	482772	0	1.1012e+06	7.38982e+07	666734	351393	0
PC(37:3)pH	PC	1.86797e+07	5.90472e+07	2.38707e+07	1.37463e+07	3.69549e+06	7.61073e+08	2.74759e+07	1.31464e+07	1.39986e+07
PC(16:0/21:4)pH	PC	5.56359e+06	9.64893e+06	1.50434e+07	1.82704e+06	315657	5989.03	2.02979e+06	5.08599e+06	1.35905e+07
PC(17:0/20:4)pHCOO	PC	1.46814e+07	1.15061e+06	4.01483e+06	677417	4.15251e+06	1.94649e+06	377523	755864	3.71905e+06
PC(17:0/20:4)pHCOO	PC	2.38785e+07	2.60566e+07	2.86536e+07	2.63216e+07	1.73264e+07	203631	2.70125e+07	2.95484e+07	3.35549e+07
PC(37:4)pH	PC	3.14796e+08	2.32058e+08	3.2751e+08	2.89771e+08	2.86546e+08	5.21296e+06	3.5716e+08	2.72985e+08	3.74334e+08
PC(17:0/20:4)pHCOO	PC	1.36656e+06	3.01568e+06	1.12788e+06	1.68249e+06	1.40412e+06	2.72967e+07	1.85149e+06	3.02243e+06	1.2085e+06
PC(18:0/19:4)pH	PC	9.38615e+08	8.54731e+07	1.00464e+09	1.04416e+09	9.46291e+08	9.8994e+07	8.266e+08	9.07717e+08	8.13767e+08
PC(37:4)pH	PC	1.0809e+08	1.54738e+08	1.07169e+08	2.08718e+08	4.94366e+08	4.2601e+08	1.99894e+08	1.21769e+08	9.69508e+07
PC(17:1/20:4)pHCOO	PC	3.00049e+07	2.24647e+06	3.43095e+07	3.5425e+07	1.94779e+07	0	1.45418e+07	2.41938e+07	3.81444e+07
PC(37:5)pH	PC	9.31093e+08	9.20218e+08	1.22852e+09	9.35824e+08	6.56939e+08	1.01425e+06	7.77274e+08	3.71516e+07	9.04019e+08
PC(17:1/20:4)pHCOO	PC	222504	299585	176334	1.26531e+06	792480	3.8527e+07	292322	2.87145e+06	1.58988e+06
PC(37:5)pH	PC	2.13324e+07	1.74661e+07	1.16115e+07	1.80508e+06	1.79693e+07	1.07593e+09	3.14589e+07	1.78314e+07	6.44459e+07
PC(18:1/19:4)pH	PC	5.38455e+08	6.19178e+08	5.28305e+08	7.7265e+08	5.59467e+08	1.01067e+08	3.05133e+08	2.61691e+08	5.18749e+08
PC(18:1/19:4)pHCOO	PC	5.96973e+07	6.19394e+07	1.58422e+08	1.3712e+08	8.48808e+07	5.26736e+07	3.13288e+07	1.10376e+08	1.45082e+08
PC(17:4/20:1)pH	PC	9.17883e+08	7.07207e+08	9.51035e+08	6.87236e+08	9.29283e+08	3.52016e+07	1.90472e+08	8.33139e+08	1.06691e+09
PC(18:0/19:5)pH	PC	9.44898e+06	8.14543e+06	6.02734e+06	3.32114e+06	1.91434e+06	2.85015e+08	1.18905e+07	1.01161e+07	2.20915e+06
PC(37:6)pH	PC	1.07763e+08	1.1299e+08	1.48512e+08	1.16644e+08	9.13756e+07	336209	8.08801e+07	7.48804e+07	1.23374e+08
PC(18:1/19:5)pH	PC	1.10861e+09	1.0566e+09	1.23417e+09	1.23436e+09	9.32777e+08	5.33063e+06	9.73795e+08	7.71099e+08	9.44786e+08
PC(18:1/19:5)pH	PC	6.62973e+08	7.59085e+08	6.12202e+08	5.33257e+08	1.14024e+09	7.17646e+07	3.7057e+08	3.96522e+08	4.16719e+08
PC(37:6)pH	PC	1.51403e+09	1.39176e+09	1.5512e+09	1.53921e+09	1.37115e+09	1.18514e+09	2.23319e+08	6.78574e+08	9.32495e+08
PC(18:1/19:5)pH	PC	1.54268e+09	1.39176e+09	2.17176e+07	1.51022e+09	1.38278e+09	6.64352e+08	6.44933e+08	1.93141e+07	9.36249e+08
PC(37:6p)pH	PC	2.82018e+07	2.70598e+07	3.57464e+07	2.44546e+07	4.93364e+07	241464	8.08405e+06	8.37476e+06	4.40464e+07
PC(37:6p)pH	PC	2.44298e+08	2.81205e+06	9.75898e+07	4.74724e+07	6.19512e+07	4.75224e+06	1.90583e+08	1.86174e+08	1.29262e+08
PC(37:7)pH	PC	6.75763e+07	4.91927e+07	6.68377e+07	8.57476e+07	4.72335e+06	629191	6.92326e+06	1.44845e+06	2.68925e+07
PC(37:7)pH	PC	1.29527e+09	1.25429e+09	1.31583e+09	1.52482e+09	1.15213e+09	9.71551e+07	8.69246e+08	8.31613e+08	9.54701e+08
PC(37:8)pH	PC	1.94047e+08	7.74411e+07	2.47569e+08	2.11169e+08	1.67969e+08	604336	5.04431e+06	1.02888e+07	9.91741e+07
PC(37:8)pH	PC	5.5524e+07	5.71075e+07	4.41592e+07	3.2644e+07	1.42784e+07	1.98503e+08	1.96572e+07	1.34297e+07	1.87327e+07
PC(20:5/17:3)pHCOO	PC	0	0	0	0	0	3.41249e+06	0	0	0
PC(37:9)pH	PC	3.93032e+06	2.78595e+06	3.62272e+06	2.54322e+07	1.06585e+06	0	1.7687e+06	1.12495e+07	2.24971e+07
PC(16:0/22:0)pHCOO	PC	2.80307e+07	2.64349e+07	3.16821e+07	3.17631e+07	3.28111e+07	1.07079e+07	1.19863e+07	1.32394e+07	1.15948e+07
PC(38:0)pH	PC	3.17092e+08	3.53944e+08	3.81836e+08	3.38101e+08	2.55733e+08	1.75653e+07	1.62831e+08	1.33892e+08	1.2539e+08
PC(38:0e)pH	PC	2.185e+08	2.07887e+08	3.17967e+08	2.06385e+08	2.25456e+08	1.45619e+08	8.33857e+07	9.1708e+07	1.06068e+08
PC(38:0e)pH	PC	7.53932e+06	5.90643e+07	5.80289e+06	7.94858e+07	1.19695e+08	5.19135e+07	5.67219e+07	4.14984e+07	1.63796e+06
PC(16:0/22:1)pHCOO	PC	3.71486e+08	3.38637e+08	5.06581e+08	3.45991e+08	3.43579e+08	7.29606e+07	2.46238e+08	2.1056e+08	2.57204e+08
PC(38:1)pH	PC	3.75472e+09	3.72564e+09	3.90666e+09	3.33731e+09	3.51276e+09	3.64233e+07	2.4324e+09	2.37474e+09	2.82347e+09
PC(20:0e/18:1)pHCOO	PC	2.95155e+07	4.22948e+07	2.87619e+07	3.0212e+07	4.03752e+07	5.22315e+07	2.18437e+07	2.64075e+07	3.32344e+07
PC(38:1e)pH	PC	5.6062e+07	7.27708e+08	7.0406e+07	6.29298e+08	4.99142e+08	6.70192e+08	5.62434e+08	3.71455e+07	6.36166e+08
PC(20:0p/18:1)pHCOO	PC	8.68345e+07	9.96123e+07	6.02769e+07	6.42977e+07	8.31841e+07	2.84822e+07	3.15257e+07	5.33972e+07	9.88696e+07
PC(20:1/18:1)pHCOO	PC	1.45214e+09	1.05959e+09	1.59408e+09	1.40049e+09	1.37129e+09	1.61987e+07	5.53539e+08	4.73108e+08	9.39998e+08
PC(38:2)pH	PC	1.23631e+10	7.02149e+09	7.65708e+09	1.21378e+10	7.69807e+09	2.60293e+08	3.8942e+09	1.09522e+10	1.2198e+10
PC(20:1/18:1)pHCOO	PC	5.69788e+07	5.40326e+07	4.55422e+07	9.50323e+07	1.46083e+08	4.56892e+08	1.26535e+08	5.5089e+07	3.46607e+07
PC(16:0e/22:2)pHCOO	PC	4.72875e+07	5.0107e+07	5.81305e+07	5.43375e+07	5.18686e+07	3.4203e+06	5.05566e+07	4.67906e+07	5.20061e+07
PC(38:2e)pH	PC	8.37663e+08	6.35956e+08	6.4127e+08	5.54699e+08	5.94176e+08	5.31133e+08	6.91616e+08	8.14513e+08	9.68967e+08
PC(18:0/20:3)pHCOO	PC	3.58024e+08	1.2086e+08	4.39579e+08	3.99101e+08	2.94318e+08	7.65865e+07	2.04008e+08	2.57039e+08	3.4645e+08
PC(38:3)pH	PC	5.71333e+09	5.7127e+09	9.26952e+09	5.8448e+09	5.39325e+09	6.54677e+08	9.57707e+08	1.17706e+09	3.18701e+09
PC(18:0/20:3)pHCOO	PC	1.72518e+08	3.4223e+07	6.14073e+07	5.65757e+07	6.27856e+07	2.51985e+08	2.97356e+07	6.60476e+07	2.37269e+08
PC(38:3)pH	PC	5.91005e+08	2.43604e+08	6.21745e+08	1.17781e+09	1.54918e+09	4.34954e+09	1.59881e+09	2.34351e+08	8.66215e+08
PC(16:1/22:3)pH	PC	3.27431e+06	6.88582e+06	6.64857e+06	9.19071e+06	5.34615e+06	179547	1.08372e+07	1.17828e+07	1.34359e+07
PC(16:0/22:4)pHCOO	PC	4.67347e+08	3.10914e+08	6.23874e+08	5.26047e+08	3.18632e+08	7.94501e+07	3.26728e+08	2.82872e+08	3.45577e+08
PC(38:4)pH	PC	6.39398e+09	4.39156e+09	1.08304e+10	6.43868e+09	4.10507e+09	6.04203e+08	4.28354e+09	1.88058e+09	5.71021e+09
PC(18:0/20:4)pHCOO	PC	1.74063e+08	2.79709e+08	2.46752e+08	1.84117e+08	1.72537e+08	3.25792e+08	3.07205e+08	2.60479e+08	3.73189e+08
PC(38:4)pH	PC	2.48656e+09	2.56573e+09	2.96533e+09	2.44601e+09	2.32452e+09	6.95682e+09	3.20267e+09	2.41298e+09	4.06213e+09
PC(16:0/22:4)pHCOO	PC	2.33712e+08	1.11538e+07	2.37213e+08	2.31018e+08	2.26522e+08	5.21091e+08	3.04369e+08	3.99197e+07	3.7063e+08
PC(38:4)pH	PC	1.79872e+09	7.66071e+08	1.83175e+09	1.8168e+09	1.74022e+09	5.47374e+09	6.90379e+08	157547692	5.80674e+06
PC(18:0/20:4)pHCOO	PC	0	317707	0	10925.8	0	1.59157e+08	0	142393	0
PC(18:0e/20:4)pHCOO	PC	4.154e+07	1.34956e+07	4.29773e+07	4.35823e+06	3.68935e+07	4.8851e+06	3.19133e+07	1.03391e+08	1.24703e+08
PC(38:4e)pH	PC	5.10028e+08	2.72925e+08	5.72272e+08	5.17644e+08	4.58344e+08	2.16714e+08	1.081e+09	3.21758e+08	1.63545e+09
PC(38:4e)pH	PC	8.51649e+07	3.1216e+07	7.20719e+07	2.54259e+07	4.88862e+07	3.26097e+08	3.98399e+07	5.23319e+07	9.70204e+07
PC(18:0p/20:4)pHCOO	PC	1.00351e+08	1.07423e+08	1.64571e+08	1.38351e+08	1.02057e+08	84062.2	4.00884e+08	1.61554e+08	4.11208e+08
PC(38:4p)pH	PC	1.58762e+09	2.88632e+08	2.03723e+09	1.89418e+09	1.45415e+09	6.65253e+06	5.65299e+09	1.85015e+09	6.20933e+09
PC(18:0p/20:4)pHCOO	PC	3.33382e+07	2.07376e+07	2.23587e+07	3.04526e+07	3.1031e+07	3.72969e+07	1.30166e+07	4.28346e+06	6.38657e+06
PC(18:0p/20:4)pHCOO	PC	8.74941e+06	3.50866e+06	1.4684e+07	2.5784e+07	2.74372e+07	1.39231e+07	2.70253e+07	7.93237e+06	2.64759e+07
PC(18:0p/20:4)pCH3COO	PC	284098	0	256119	0	0	0	0	0	760822
PC(18:0p/20:4)pHCOO	PC	0	0	0	0	0	2.62893e+07	0	0	0
PC(18:1/20:4)pHCOO	PC	5.60339e+08	5.47271e+08	6.46117e+08	6.34415e+08	4.5345e+08	2.22327e+07	7.59291e+08	5.51679e+07	8.52757e+08
PC(38:5)pH	PC	5.3686e+09	5.43478e+09	5.75254e+09	5.31431e+09	4.78473e+09	3.75122e+08	8.2761e+09	1.30703e+09	7.05533e+09
PC(18:0/20:5)pHCOO	PC	2.31991e+08	4.64604e+07	1.04378e+08	1.31865e+08	1.08394e+08	1.36587e+08	1.09884e+08	2.32254e+07	1.28894e+08
PC(18:1/20:4)pHCOO	PC	2.70392e+06	334355	495959	1.45587e+07	1.46154e+07	6.52994e+08	1.01988e+07	1.22357e+06	1.42146e+06
PC(38:5)pH	PC	6.32392e+08	9.20148e+08	5.09236e+08	9.3406e+08	1.63172e+09	5.92504e+09	1.28338e+09	5.89598e+08	5.99373e+08
PC(17:4/21:1)pH	PC	1.84296e+07	2.53157e+07	1.96963e+07	4.86108e+06	1.3747e+07	1.82972e+07	1.94427e+07	5.67148e+06	1.68552e+07
PC(18:1p/20:4)pHCOO	PC	1.31047e+08	1.09648e+08	1.23323e+08	1.35769e+08	1.07142e+08	82730.9	3.02328e+08	4.12855e+07	3.26757e+08
PC(18:1p/20:4)pHCOO	PC	279786	265794	0	207173	2.71323e+06	1.39658e+08	364837	309151	0
PC(18:1/20:5)pHCOO	PC	1.35182e+08	1.7814e+07	7.00602e+07	8.18785e+07	1.78574e+08	9.08094e+06	1.47084e+08	1.0542e+08	1.95605e+08
PC(18:1/20:5)pNa	PC	3.94639e+07	5.69878e+06	929194	8.58214e+06	8.66543e+06	1.18212e+08	1.72504e+06	8.42302e+06	9.43387e+07
PC(38:6)pH	PC	3.68167e+09	1.1031e+09	4.84708e+09	4.37102e+09	4.11261e+09	2.23115e+08	6.25215e+08	1.01584e+09	4.22812e+09
PC(16:0/22:6)pHCOO	PC	1.60072e+08	1.05767e+08	2.18596e+08	1.8443e+08	1.85199e+08	9.08094e+06	1.48862e+08	1.06251e+08	1.83089e+08
PC(16:0/22:6)pNa	PC	4.18809e+07	4.88256e+07	5.03093e+07	1.39242e+07	3.74224e+07	8.45895e+06	7.19378e+07	5.54671e+07	8.80513e+07
PC(16:0/22:6)pHCOO	PC	5.12905e+08	4.21356e+08	6.68167e+08	5.94092e+08	4.52751e+08	1.11135e+08	2.73583e+08	3.90279e+08	3.92558e+08
PC(16:0/22:6)pNa	PC	1.06353e+08	9.14855e+07	9.71612e+07	1.19872e+08	7.43375e+07	3.12669e+06	1.29209e+08	3.83732e+07	1.03573e+08
PC(38:6)pH	PC	9.12317e+09	9.66172e+09	1.12075e+10	1.12873e+10	7.37545e+09	2.87923e+09	7.95565e+09	3.68238e+09	9.01548e+09
PC(18:1/20:5)pHCOO	PC	5.3541e+08	4.21308e+08	6.21959e+08	5.8272e+08	4.47997e+08	1.94725e+08	3.96537e+08	3.27917e+08	4.22705e+08
PC(16:0/22:6)pHCOO	PC	9.44417e+06	7.65939e+06	9.27991e+06	8.95701e+06	2.64393e+06	5.34829e+08	1.00008e+07	2.04338e+07	1.58581e+07
PC(38:6)pH	PC	1.45435e+07	2.97479e+07	2.46916e+07	3.97411e+07	1.42443e+07	1.0596e+10	4.8158e+07	4.52518e+07	7.61192e+07
PC(38:6e)pH	PC	1.38743e+09	3.90929e+08	1.76762e+09	1.42788e+09	1.39062e+09	5.63288e+06	4.23122e+09	2.22614e+09	4.2085e+09
PC(38:6e)pH	PC	0	346852	999806	3.4592e+06	3.6494e+07	1.51532e+09	452029	1.63377e+06	3.1128e+06
PC(18:1p/20:5)pHCOO	PC	3.26356e+06	7.30332e+06	6.88166e+06	4.59674e+06	4.34161e+06	128041	1.21177e+07	9.47035e+06	1.56139e+06
PC(38:6p)pH	PC	1.15378e+08	1.02221e+08	1.76948e+08	1.17021e+08	8.80049e+07	2.2126e+06	3.02872e+08	2.33738e+08	3.68208e+08
PC(16:0p/22:6)pHCOO	PC	3.62786e+07	1.16036e+07	3.61718e+07	3.02449e+07	2.41508e+07	825532	7.23432e+07	5.53952e+07	6.56341e+07
PC(38:6p)pH	PC	2.67972e+08	2.38954e+08	4.08654e+08	3.76739e+08	3.27083e+08	7.93144e+07	9.1754e+08	7.58936e+08	9.60066e+08
PC(38:6p)pH	PC	0	0	0	0	0	4.14691e+08	2.29595e+06	35089.5	0
PC(16:1/22:6)pHCOO	PC	8.48204e+07	6.46659e+07	9.76157e+07	9.00042e+07	6.30915e+07	0	1.78269e+07	1.29096e+07	3.31083e+07
PC(38:7)pH	PC	1.52756e+09	2.00371e+09	1.88487e+08	1.60643e+08	1.40469e+09	1.54395e+06	8.81261e+08	7.87671e+08	1.2146e+09
PC(16:1/22:6)pHCOO	PC	235204	98604.2	819103	782351	236118	9.70014e+07	726213	878741	839273
PC(38:7)pH	PC	6.82771e+07	5.35269e+07	4.96495e+07	6.03364e+06	2.43264e+07	2.04751e+09	7.7735e+06	1.1161e+07	8.92833e+06
PC(16:2/22:5)pCH3COO	PC	1.75704e+07	2.24911e+07	1.72563e+07	3.15891e+07	2.02218e+07	4.81991e+08	3.18348e+07	2.33995e+07	1.65575e+07
PC(38:7p)pH	PC	8.2528e+06	1.24346e+07	1.88351e+07	9.23727e+06	6.25477e+06	48179.8	4.88294e+07	1.64156e+07	3.59061e+07
PC(38:8)pH	PC	3.64957e+06	7.80194e+06	3.45303e+06	5.66175e+06	1.54223e+07	1.12017e+07	2.18587e+07	1.48836e+07	4.61117e+07
PC(38:8)pH	PC	3.53509e+07	3.02103e+07	3.13195e+07	3.11958e+06	3.67154e+07	993452	5.92468e+06	3.75106e+07	9.51111e+07
PC(38:9)pH	PC	1.34098e+07	1.36358e+07	2.1797e+07	5.04346e+06	2.91578e+06	5901.95	538558	3.09216e+06	2.35888e+07
PC(16:0/23:1)pHCOO	PC	6.73623e+06	6.09266e+06	1.13588e+07	7.06671e+06	6.31965e+06	204252	6.18162e+06	5.07799e+06	4.38773e+06
PC(39:1)pH	PC	1.39383e+08	1.69372e+08	1.89313e+08	1.19973e+08	7.23276e+07	5.15729e+07	7.22486e+07	7.85451e+07	9.2767e+07
PC(18:1/21:0)pH	PC	5.38202e+08	513215713	5.52153e+08	5.99003e+08	5.47648e+08	5.43096e+08	2.83212e+08	2.48564e+08	2.73974e+08
PC(18:1/21:1)pHCOO	PC	6.3808e+07	4.40803e+07	4.51222e+07	6.54318e+07	4.90493e+07	1.09871e+06	3.8349e+07	6.03851e+07	5.00695e+07
PC(39:2)pH	PC	7.68794e+08	7.37164e+08	8.66109e+08	5.85744e+08	6.30903e+08	5.7635e+07	6.90325e+08	6.4805e+08	8.025e+08
PC(18:1/21:1)pHCOO	PC	413503	965747	1.27204e+06	505886	2.54583e+06	3.37575e+07	2.67908e+06	1.7409e+06	1.18271e+06
PC(39:2)pH	PC	9.12419e+06	4.74719e+07	2.31953e+07	3.19157e+07	2.02478e+06	4.57482e+08	6.76638e+07	3.9024e+07	5.85248e+06
PC(18:1/21:1)pH	PC	6.46778e+08	5.84038e+08	5.22552e+08	7.42234e+08	6.44582e+08	5.39807e+06	3.09215e+08	3.46146e+08	2.78677e+08
PC(39:2p)pH	PC	9.10473e+07	8.88886e+07	1.09553e+08	7.8376e+07	401670	157525	7.12746e+07	5.93498e+07	8.26901e+07
PC(18:1/21:2)pHCOO	PC	2.08876e+07	1.10104e+07	3.04915e+07	2.83331e+07	36325.6	0	1.23311e+07	1.61962e+07	2.64711e+07
PC(39:3)pH	PC	3.09184e+08	1.52652e+08	3.34945e+08	3.00744e+08	6.88605e+07	3.24072e+07	2.39178e+08	1.60259e+08	3.64239e+08
PC(18:1/21:2)pHCOO	PC	5141.94	507906	0	501742	0	2.15715e+07	14568.9	2790.98	0
PC(18:1/21:2)pH	PC	2.17656e+08	1.09888e+08	2.09713e+08	1.74747e+08	1.92846e+08	1.42916e+08	1.22698e+08	1.22508e+08	1.00809e+08
PC(18:1/21:3)pHCOO	PC	1.4743e+06	3.85729e+06	4772.51	1.41822e+06	1.35184e+06	0	10201.2	653237	787086
PC(39:4)pH	PC	3.77753e+07	2.15257e+07	1.5332e+06	4.79639e+07	79433.2	5.25315e+06	3.49173e+07	4.63705e+07	4.54695e+07
PC(19:0/20:4)pHCOO	PC	3.28896e+06	1.8151e+06	5.44452e+06	3.61447e+06	328638	9561.62	3.06948e+06	1.14186e+06	4.24116e+06
PC(39:4)pH	PC	4.61224e+07	5.3731e+07	6.40602e+07	5.18561e+07	6.13208e+06	1.7022e+06	6.13032e+06	1.6796e+07	1.0714e+08
PC(18:1/21:3)pHCOO	PC	208414	1.68936e+06	1.37024e+06	2.38708e+06	2.22037e+06	0	2.03633e+06	2.26469e+06	437757
PC(19:1/20:4)pHCOO	PC	973607	5.00006e+06	4.15699e+07	3.085e+07	6.18198e+06	371338	1.94749e+07	3.48491e+06	3.35217e+07
PC(39:5)pH	PC	2.69577e+08	1.78563e+08	3.72869e+08	2.98607e+08	3.42378e+08	3.45097e+06	4.94387e+08	3.67383e+08	3.344e+08
PC(19:1/20:4)pHCOO	PC	2.09086e+06	7.21433e+06	5.1195e+06	3.511e+06	5.26392e+06	3.40086e+07	5.11311e+06	881543	1.63234e+06
PC(39:5)pH	PC	1.4156e+06	5.2837e+06	1.96939e+06	1.46088e+06	1.11587e+06	3.18976e+08	1.25665e+06	1.72852e+06	1.08412e+06
PC(17:4/22:1)pH	PC	1.16747e+08	3.79735e+07	8.94291e+07	1.11847e+08	1.14641e+08	836879	8.08855e+07	9.94221e+07	4.09664e+07
PC(17:4/22:1)pH	PC	21580.7	1.16125e+07	2.12997e+06	46807.7	2.09967e+07	7.19629e+07	1.07607e+07	6.59735e+06	0
PC(17:4/22:1)pHCOO	PC	6399.86	4.72656e+06	4.46278e+06	4.20339e+06	2.09778e+06	1.19594e+06	398513	4.59533e+06	3.0408e+06
PC(39:5e)pH	PC	3.08883e+06	3.09337e+06	8.94338e+06	2.80368e+06	2.55417e+06	2.41128e+06	1.63073e+07	6.8668e+06	2.70562e+07
PC(39:5e)pH	PC	1.57723e+08	1.70467e+07	1.4283e+08	1.53073e+07	6.07273e+06	2.22549e+07	2.32399e+08	2.30333e+08	2.00562e+08
PC(17:1/22:5)pHCOO	PC	1.4859e+07	6.31316e+06	1.17857e+07	9.34418e+06	9639.91	0	3.80645e+06	3.07423e+06	9.47093e+06
PC(39:6)pH	PC	1.91956e+08	6.72371e+07	2.4395e+08	2.38004e+08	1.49335e+08	0	1.88941e+08	4.00112e+07	1.91096e+08
PC(19:1/20:5)pHCOO	PC	1.19138e+07	1.40263e+06	7.61795e+06	3.69537e+06	817743	400522	2.01501e+06	1.77586e+06	9.45014e+06
PC(39:6)pH	PC	7.68298e+07	7.49413e+07	5.85517e+07	8.6709e+07	6.41174e+07	2.66692e+08	6.31549e+07	1.95207e+07	7.02555e+07
PC(18:0/21:6)pH	PC	9.15877e+07	1.57502e+08	7.88258e+07	6.95813e+07	5.99132e+07	4.44597e+07	4.97944e+07	4.6645e+07	6.27494e+07
PC(39:6e)pH	PC	2.44214e+07	1.46796e+07	6.93581e+06	1.06856e+06	1.30485e+07	0	4.95816e+07	5.4191e+07	4.10634e+07
PC(39:6p)pH	PC	3.3106e+06	4.08803e+07	1.75329e+07	2.24299e+07	1.53943e+07	0	3.00843e+07	1.5643e+07	2.36463e+07
PC(17:1/22:6)pHCOO	PC	1.4268e+07	6.12087e+06	9.51102e+06	8.81221e+06	6.80019e+06	84714.3	5.81865e+06	2.60011e+06	6.80715e+06
PC(39:7)pH	PC	2.43606e+08	1.90471e+08	3.19046e+08	2.59548e+08	1.9742e+08	29078.4	4.83047e+07	8.48032e+07	1.48731e+08
PC(39:7)pH	PC	0	333828	0	0	0	2.9489e+08	0	0	0
PC(22:5/17:2)pHCOO	PC	5.44733e+08	2.53611e+07	6.63653e+07	3.14839e+07	1.83527e+07	4.7777e+08	2.82961e+07	2.36947e+08	1.54258e+07
PC(22:5/17:2)pHCOO	PC	1.02841e+06	164495	0	788100	0	4.22046e+07	1.17744e+06	756602	553774
PC(18:2/21:6)pCH3COO	PC	4.35328e+07	2.40256e+07	4.98149e+07	5.74518e+07	3.60244e+07	633675	7.45286e+06	3.46651e+06	9.60096e+06
PC(39:8)pH	PC	2.07366e+06	2.11035e+07	6.84071e+06	9.11437e+06	2.87617e+06	0	6.6382e+06	5.49909e+06	8.10485e+06
PC(18:2p/21:6)pH	PC	0	0	0	0	0	0	0	3.15777e+06	0
PC(17:4/22:5)pH	PC	8.60082e+07	1.07711e+08	1.23643e+08	8.96631e+07	1.2997e+06	343601	6.06629e+06	7.59333e+06	3.74374e+07
PC(17:4/22:5)pH	PC	3.8879e+06	400286	1.13548e+06	5.72623e+06	0	1.00842e+08	1.20488e+07	149798	2.63949e+07
PC(16:0/24:0)pHCOO	PC	6.94517e+07	6.5768e+07	8.98106e+07	6.7763e+07	7.58995e+07	6.54303e+07	2.55189e+07	2.12285e+07	2.39434e+07
PC(40:0)pH	PC	7.37634e+08	5.64138e+08	1.00776e+09	8.33313e+08	7.42564e+08	7.17914e+08	2.52579e+08	2.56439e+08	2.82645e+08
PC(16:0/24:1)pHCOO	PC	2.51038e+08	2.66318e+08	3.0153e+08	2.14261e+08	2.77214e+08	2.48389e+08	1.05267e+08	8.186e+07	1.02657e+08
PC(40:1)pH	PC	2.89065e+09	2.74467e+09	3.17306e+09	2.48139e+09	1.86056e+09	2.26543e+09	1.31799e+09	1.16535e+09	1.2955e+09
PC(40:10)pH	PC	1.57517e+07	2.21607e+06	1.76445e+06	4.69346e+06	3.02619e+07	168949	2.33502e+07	4.12823e+06	1.68153e+07
PC(40:10)pH	PC	0	0	0	0	0	2.7466e+07	165175	0	0
PC(16:0e/24:1)pHCOO	PC	3.12494e+07	2.35787e+07	2.69388e+07	2.9816e+07	1.66874e+07	5.46344e+06	1.62978e+07	1.24437e+07	1.57303e+07
PC(40:1e)pH	PC	3.22878e+08	3.58173e+08	7.90978e+07	2.92999e+08	2.83262e+08	2.97646e+08	1.7572e+08	1.06521e+08	1.54893e+08
PC(40:1e)pH	PC	3.2634e+06	1.05115e+06	4.29654e+07	1.56814e+06	7.02288e+06	2.45945e+07	1.99222e+06	98836.8	3.03991e+06
PC(18:1/22:1)pHCOO	PC	3.90629e+08	3.20951e+08	4.20468e+08	3.58493e+08	3.86611e+08	3.14643e+08	2.85075e+08	2.24975e+08	3.04395e+08
PC(40:2)pH	PC	4.26785e+09	3.06378e+08	4.39609e+09	3.62245e+09	3.81311e+09	3.33532e+09	3.16628e+09	3.23797e+09	3.69558e+09
PC(40:2)pH	PC	2.35511e+08	3.57717e+08	1.21218e+08	4.71224e+06	4.99715e+08	9.20222e+08	3.36785e+08	1.72195e+08	1.47475e+08
PC(40:2e)pH	PC	3.21803e+08	2.98659e+08	3.44693e+08	2.68288e+08	2.19374e+08	2.53207e+08	4.04753e+08	2.59162e+08	3.6216e+08
PC(40:2p)pH	PC	9.86074e+07	1.06392e+08	1.07593e+08	8.04889e+07	1.2091e+08	7.11655e+06	1.36212e+08	1.27233e+08	1.43551e+08
PC(40:2p)pH	PC	2.11411e+08	2.69742e+08	3.3677e+08	2.05132e+08	1.8392e+08	1.04066e+08	2.64881e+08	2.36574e+08	2.39757e+08
PC(18:1/22:2)pHCOO	PC	1.30775e+08	1.38769e+08	1.74717e+08	1.61252e+08	1.53534e+08	6.21399e+06	2.86507e+06	1.13936e+08	1.1525e+08
PC(40:3)pH	PC	1.21014e+09	1.58537e+09	3.90536e+08	1.42289e+09	1.22337e+09	7.94852e+07	1.61133e+09	1.55125e+09	1.31233e+09
PC(18:1/22:2)pHCOO	PC	6.95928e+06	1.22982e+07	6.44381e+06	1.57972e+07	1.86205e+07	2.63654e+07	1.88713e+07	1.25419e+07	9.62443e+06
PC(40:3)pH	PC	2.29604e+06	2.78705e+08	1.09971e+08	437745	1.99764e+06	3.09832e+08	3.51579e+06	2.09716e+08	1.8472e+08
PC(40:3p)pH	PC	2.05131e+08	1.76505e+08	2.18077e+08	3.43935e+08	1.33404e+08	9.71937e+06	3.4397e+08	2.88191e+08	3.02085e+08
PC(40:3p)pH	PC	4.10093e+08	3.18438e+08	6.94015e+08	2.38153e+08	2.5568e+08	1.05881e+08	5.60208e+08	1.42826e+09	6.07121e+08
PC(18:0/22:4)pHCOO	PC	7.08749e+07	6.79493e+07	4.77469e+07	8.27771e+07	7.47043e+07	5.44242e+07	2.55163e+07	7.112e+07	6.69943e+07
PC(40:4)pH	PC	1.1388e+09	6.34278e+08	1.46409e+09	1.30695e+09	9.9768e+08	5.18223e+08	1.28638e+09	3.51005e+08	1.57193e+09
PC(18:0/22:4)pHCOO	PC	2.10763e+07	2.02674e+07	2.27087e+07	2.06346e+07	1.10535e+08	4.78959e+07	1.16157e+07	2.05075e+07	7.82831e+07
PC(40:4)pH	PC	2.91445e+08	4.16005e+08	2.59021e+08	7.92049e+08	1.89082e+08	8.36099e+08	9.56164e+08	4.29727e+08	2.7756e+08
PC(20:0e/20:4)pHCOO	PC	9.22133e+06	9.78193e+06	2.65143e+07	1.11269e+07	6.96443e+06	5.18246e+06	1.63277e+07	3.48293e+07	2.16349e+07
PC(18:0e/22:4)pHCOO	PC	2.85754e+07	2.46264e+07	1.81572e+06	844529	1.46316e+06	1.26492e+07	5.92679e+07	1.38755e+06	4.70189e+07
PC(20:0p/20:4)pHCOO	PC	41744	7.54367e+06	2.36497e+06	3.69589e+06	1.23623e+06	0	3.747e+06	5.36761e+06	1.00749e+06
PC(20:0p/20:4)pHCOO	PC	1.06471e+07	9.07843e+06	9.04284e+06	9.68842e+06	7.48637e+06	1.16289e+06	8.31904e+06	1.39562e+07	1.29703e+07
PC(18:1/22:4)pHCOO	PC	3.64661e+08	3.37432e+08	4.54968e+08	4.33159e+08	2.4057e+08	3.12419e+07	2.71084e+08	1.87156e+08	2.33817e+08
PC(40:5)pH	PC	4.48713e+09	2.04811e+08	5.42299e+09	5.45474e+09	3.84545e+09	1.28519e+08	3.79389e+09	1.23515e+09	4.01758e+09
PC(20:1/20:4)pHCOO	PC	1.16974e+08	8.27616e+07	9.90773e+07	8.50557e+07	1.394e+08	2.96863e+08	1.56278e+07	1.88031e+08	1.25008e+08
PC(40:5)pH	PC	7.8503e+08	5.93094e+08	8.6745e+08	7.68912e+08	8.1091e+08	1.03345e+08	7.85708e+08	6.83199e+08	1.38543e+09
PC(18:0/22:5)pHCOO	PC	1.08867e+06	5.35013e+06	629672	8.84969e+06	6.48726e+06	6.94168e+07	2.51539e+06	8.3504e+06	1.5772e+07
PC(40:5)pH	PC	2.15832e+07	1.09214e+07	4.28372e+07	1.84916e+07	1.46983e+08	7.67122e+08	1.95624e+08	2.00525e+07	2.97052e+07
PC(18:0e/22:5)pHCOO	PC	1.37074e+07	1.01585e+07	2.48952e+07	1.59447e+07	1.82223e+07	1.54629e+06	1.98701e+07	2.4349e+07	1.99643e+07
PC(40:5e)pH	PC	1.52369e+08	7.94996e+07	1.90518e+08	1.25033e+08	3.01959e+08	1.40713e+08	2.2073e+08	1.26116e+08	5.6483e+08
PC(40:5e)pH	PC	1.11909e+08	1.96197e+08	2.27985e+08	2.51373e+08	1.83722e+08	4.30588e+08	5.48266e+08	4.55205e+08	6.9747e+08
PC(18:0p/22:5)pHCOO	PC	1.19982e+07	1.10995e+07	1.22741e+07	2.04585e+07	403288	0	5.14955e+07	2.01583e+07	5.84366e+07
PC(18:0p/22:5)pHCOO	PC	1.76631e+07	1.18596e+07	1.82904e+07	9.92034e+06	9.2581e+06	1.3951e+07	2.16995e+07	4.02369e+07	5.93312e+06
PC(18:0p/22:5)pHCOO	PC	0	0	0	0	0	9.15103e+06	0	0	0
PC(18:1/22:5)pHCOO	PC	1.95861e+08	1.12068e+08	2.43152e+08	1.84442e+08	1.85174e+08	4.18018e+06	1.28932e+08	3.38859e+07	1.52548e+08
PC(16:0/24:6)pHCOO	PC	4.04641e+08	3.76207e+07	1.47704e+08	1.03551e+08	8.42752e+07	5.66334e+07	9.46894e+07	7.65324e+07	8.10871e+07
PC(18:1/22:5)pHCOO	PC	2.48207e+08	2.59437e+08	3.28881e+08	3.05179e+08	2.24266e+08	1.59875e+08	2.1549e+08	1.77909e+08	2.24338e+08
PC(40:6)pNa	PC	1.32775e+06	1.66479e+07	647431	9.88445e+06	7.87218e+06	0	8.64929e+06	8.02469e+06	6.21976e+06
PC(40:6)pH	PC	2.98146e+09	3.20888e+09	3.56302e+09	3.97111e+09	2.66005e+09	1.98472e+09	2.78805e+09	1.46673e+09	3.23998e+09
PC(18:0/22:6)pHCOO	PC	243183	187775	5.43343e+06	1.8059e+06	0	2.83761e+08	4.63592e+06	4.14197e+06	6.09293e+06
PC(40:6)pH	PC	1.0912e+06	11213.8	0	783791	1.31935e+06	3.13339e+09	125048	41611.2	998453
PC(40:6e)pH	PC	2.41963e+08	2.28508e+08	2.8143e+08	2.81631e+08	2.036e+08	6.72263e+06	8.47864e+08	5.89823e+08	7.91303e+08
PC(18:0e/22:6)pHCOO	PC	1.53657e+07	1.18069e+07	1.79275e+07	1.12827e+07	2.50603e+06	1.95963e+07	1.84832e+07	3.99469e+07	3.34695e+07
PC(40:6e)pH	PC	4.76853e+08	1.01704e+08	5.35473e+08	4.7498e+08	4.33197e+08	2.28878e+08	1.01e+09	5.31429e+08	7.69961e+08
PC(40:6e)pH	PC	4.26307e+07	5.99824e+06	3.22745e+07	768124	8.06517e+07	3.06019e+08	1.53552e+08	2.19315e+07	5.68024e+07
PC(18:1p/22:5)pHCOO	PC	4.05255e+07	7.12164e+06	2.70177e+06	1.93795e+07	8.52135e+06	108220	4.69122e+07	3.49921e+07	4.68961e+07
PC(40:6p)pH	PC	3.33172e+08	2.60231e+08	3.23613e+08	2.87046e+08	2.38527e+08	0	8.51916e+08	6.87113e+08	7.14027e+08
PC(40:6p)pH	PC	3.23496e+08	4.97361e+07	3.34706e+08	3.36402e+08	3.13442e+08	5.78264e+06	8.14602e+08	5.80904e+08	7.7099e+08
PC(40:6p)pH	PC	1.20447e+08	1.32519e+06	1.41571e+08	6.91727e+07	1.6315e+08	2.22217e+08	1.3463e+08	1.54653e+08	3.18532e+08
PC(22:5/18:2)pHCOO	PC	1.93649e+07	1.90764e+07	3.44724e+07	4.72116e+07	1.40683e+07	0	8.70394e+06	2.04383e+06	1.1459e+07
PC(40:7)pH	PC	2.00099e+08	4.08858e+08	4.92461e+08	3.62093e+08	2.42659e+08	1.94365e+06	3.14416e+08	5.12952e+07	8.2934e+07
PC(18:1/22:6)pHCOO	PC	5.42785e+08	1.83204e+07	6.87185e+08	5.50887e+08	4.43628e+08	4.35768e+06	2.57895e+08	2.34808e+08	3.36066e+08
PC(18:1/22:6)pNa	PC	8.37574e+07	8.65066e+07	7.36587e+07	7.50247e+07	3.2158e+06	4.10857e+07	7.33439e+07	2.15969e+07	3.34196e+07
PC(40:7)pH	PC	9.5111e+09	8.94773e+09	1.2376e+10	1.27734e+10	7.91082e+09	5.91546e+07	6.33296e+09	1.8266e+09	7.59415e+09
PC(22:5/18:2)pHCOO	PC	1.53391e+06	6.82236e+06	1.32623e+06	1.62758e+07	5.57288e+07	3.58414e+07	3.20577e+07	226930	588305
PC(18:1/22:6)pHCOO	PC	1.03149e+07	6.88591e+06	9.31925e+06	5.72306e+06	1.33638e+06	5.61602e+08	6.58477e+06	1.02496e+07	1.0565e+07
PC(18:1/22:6)pNa	PC	0	0	0	0	36626.9	6.53065e+07	0	0	0
PC(40:7)pH	PC	6.55341e+06	4.45951e+06	3.20275e+06	0	5.43151e+06	1.03675e+10	6.0112e+06	1.04398e+07	1.16234e+07
PC(40:7p)pH	PC	2.23872e+08	2.33143e+08	2.46269e+08	2.37629e+08	1.91946e+08	0	5.35519e+08	4.52541e+08	5.56347e+08
PC(40:7p)pH	PC	0	504077	0	0	0	2.3201e+08	1.56085e+06	5377.71	0
PC(18:2/22:6)pHCOO	PC	4.64258e+07	2.76911e+07	6.28563e+07	5.70176e+07	908469	633675	8.16213e+06	2.15305e+06	1.39832e+07
PC(40:8)pH	PC	8.91514e+08	8.4177e+08	1.11098e+09	9.04889e+08	6.70154e+08	1.67953e+07	1.52278e+08	2.52969e+06	2.57009e+08
PC(18:2/22:6)pHCOO	PC	501176	118572	1.70885e+06	2.87103e+06	146981	3.24442e+07	103680	373063	150840
PC(40:8)pH	PC	8.72233e+06	4.96789e+06	2.78045e+06	1.66432e+07	730518	1.01688e+09	2.51907e+06	6.59262e+06	4.86272e+06
PC(40:8p)pH	PC	1.29768e+06	142745	7.53633e+06	1.29875e+06	2.06989e+06	196175	4.39035e+06	2.65511e+06	7.78459e+06
PC(20:5/20:4)pHCOO	PC	5.96934e+06	8.16139e+06	7.43856e+06	7.06993e+06	4.88141e+06	0	549607	556500	1.24639e+06
PC(40:9)pH	PC	5.49902e+07	1.4249e+08	6.80236e+07	1.99794e+08	1.0693e+08	211432	9.16213e+06	8.56106e+06	1.56467e+07
PC(20:5/20:4)pHCOO	PC	150607	0	0	0	0	8.75749e+06	0	1673.64	126249
PC(40:9)pH	PC	1.36223e+07	4.25404e+06	7.18381e+06	6.14057e+06	3.22878e+06	1.94474e+08	1.32668e+06	2.58272e+06	1.90138e+06
PC(40:9)pH	PC	4.15108e+07	5.05505e+07	4.90977e+07	4.6297e+07	3.8121e+07	3.20156e+07	8.8951e+07	1.42315e+07	8.661e+07
PC(40:9)pH	PC	1.09737e+08	8.13032e+07	1.12768e+08	3.60147e+07	1.47336e+07	3.43656e+06	7.2242e+07	9.21713e+07	9.96613e+07
PC(25:1/16:0)pHCOO	PC	5.96091e+06	1.43057e+07	2.15906e+07	1.66853e+07	1.13514e+07	503688	3.52143e+06	2.71297e+06	6.1046e+06
PC(18:1/23:1)pHCOO	PC	1.01143e+07	1.83233e+07	3.07941e+07	2.02855e+07	1.79875e+07	1.39491e+07	7.03992e+06	8.69371e+06	1.40451e+07
PC(41:2)pH	PC	2.82919e+08	3.05085e+08	3.46414e+08	1.72894e+08	1.97262e+08	2.27412e+08	1.70856e+08	1.68598e+08	1.86543e+08
PC(18:1/23:1)pH	PC	1.81611e+08	1.82175e+08	2.10889e+08	2.04024e+08	1.65619e+08	1.6363e+08	7.09008e+07	7.88174e+07	5.97418e+07
PC(18:1/23:2)pHCOO	PC	1.06091e+07	7.03996e+06	1.09397e+07	1.67864e+07	1.19307e+07	0	2.14878e+06	8.02835e+06	1.37049e+07
PC(41:3)pH	PC	1.59647e+08	1.51026e+08	1.74778e+08	1.72688e+08	1.38203e+08	1.19031e+08	1.2841e+08	1.20127e+08	1.86107e+08
PC(18:1/23:2)pH	PC	5.59477e+07	8.11921e+07	8.38649e+07	1.08218e+08	8.32772e+07	128736	5.13683e+07	4.21637e+07	3.05739e+07
PC(18:1/23:3)pHCOO	PC	1.44361e+06	413338	727454	166343	98086.8	0	0	359963	1.70137e+06
PC(41:4)pH	PC	3.52634e+07	1.48786e+07	1.45112e+07	4.81725e+07	3.2564e+07	0	2.55944e+07	1.50767e+06	3.18048e+07
PC(41:4)pH	PC	32479.4	1.46984e+06	1.67871e+06	0	3.27473e+06	2.68316e+07	8.83788e+06	1.18688e+06	2.45802e+06
PC(17:4/24:0)pH	PC	5.88058e+07	6.15271e+07	6.91127e+07	7.02278e+07	5.49809e+07	2.19846e+07	6.05859e+07	4.84425e+07	5.15849e+07
PC(41:5)pH	PC	2.88926e+07	2.03303e+07	5.77628e+07	2.31112e+07	8.3504e+06	452392	1.96111e+07	3.12807e+06	2.63862e+07
PC(41:5)pH	PC	0	425635	0	0	0	2.90281e+07	612794	60000	16489.7
PC(17:4/24:1)pH	PC	1.52569e+08	1.59884e+08	1.24114e+08	1.05124e+08	1.39801e+08	3.1215e+07	1.09426e+08	1.00795e+08	9.69733e+07
PC(41:6)pH	PC	8.85276e+07	3.35721e+06	8.41142e+07	8.44635e+07	4.12445e+06	0	8.0949e+07	3.5105e+07	2.57764e+07
PC(41:6)pH	PC	38275.9	2.23992e+07	2.55429e+06	9.84477e+06	9.91982e+06	3.45029e+07	6.56639e+06	46063.6	7.92154e+06
PC(17:4/24:2)pH	PC	2.88442e+07	1.77257e+07	4.01097e+07	4.22644e+07	2.43884e+07	10717.2	3.59635e+07	1.29104e+07	5.61498e+06
PC(41:7)pH	PC	7.27355e+07	5.73779e+06	5.19631e+07	1.69457e+07	4.24699e+07	732781	1.39931e+07	1.96926e+07	2.71807e+07
PC(41:7)pH	PC	0	0	0	0	0	3.36902e+07	0	0	0
PC(41:8)pH	PC	3.97151e+06	2.43055e+06	2.27256e+07	4.37401e+06	1.21271e+06	0	526557	369968	9.83554e+06
PC(41:8)pH	PC	0	3688.51	0	0	0	1.28639e+07	0	0	0
PC(41:9)pH	PC	0	334695	0	669253	21860.3	0	0	1.10802e+06	0
PC(26:0/16:0)pHCOO	PC	2.72264e+07	3.18483e+07	3.55396e+07	2.81169e+07	2.55006e+07	3.71916e+07	1.06353e+07	1.06142e+07	1.34789e+07
PC(42:0)pH	PC	3.91955e+08	3.45189e+08	4.87765e+08	3.11546e+08	4.17592e+08	4.15373e+08	1.21928e+08	9.81288e+07	1.34575e+08
PC(26:1/16:0)pHCOO	PC	2.41919e+08	2.43244e+08	4.0054e+07	2.7277e+08	3.2815e+07	8.07864e+07	1.18265e+08	8.62706e+07	9.96778e+07
PC(42:1)pH	PC	2.32229e+09	2.25206e+09	3.45958e+09	2.65951e+09	2.50296e+09	3.02877e+09	9.90189e+08	9.87022e+08	1.29548e+09
PC(20:4/22:6)pHCOO	PC	3.09586e+07	2.42082e+07	3.55852e+07	3.19604e+07	1.99471e+07	0	3.23954e+06	1.23819e+06	4.36628e+06
PC(20:4/22:6)pNa	PC	950548	2.13622e+07	805646	1.91551e+07	1.34734e+07	1.46356e+06	2.64495e+06	641179	1.23649e+06
PC(42:10)pH	PC	6.13948e+08	9.95012e+08	1.14253e+09	9.81311e+08	5.63164e+08	9.80449e+06	7.56121e+07	1.17081e+07	1.32747e+08
PC(20:5/22:5)pHCOO	PC	0	85946.4	0	0	0	5.275e+06	0	36246.6	0
PC(20:4/22:6)pHCOO	PC	3.5284e+06	1.85825e+06	4.40874e+06	2.21244e+06	140882	2.9195e+07	728655	4.24227e+06	3.12164e+06
PC(20:4/22:6)pNa	PC	0	0	0	0	0	1.05414e+07	0	0	0
PC(42:10)pH	PC	8.10394e+06	1.9976e+06	1.36748e+06	7.83145e+06	2.1928e+06	8.82266e+08	289383	1.02031e+06	906112
PC(20:5/22:6)pNa	PC	8.8387e+06	1.31379e+07	1.58359e+07	1.84599e+07	1.1269e+06	0	791029	742010	1.00189e+06
PC(20:5/22:6)pHCOO	PC	1.18622e+06	1.708e+06	3.4843e+06	2726.13	2810.5	0	219160	0	920.171
PC(42:11)pH	PC	5.65894e+07	6.93556e+07	1.17941e+08	1.00762e+08	86829.9	0	7.64701e+06	7.2039e+06	1.03358e+07
PC(20:5/22:6)pNa	PC	2.21726e+06	1.59477e+06	1.88454e+06	100706	1.15345e+06	1.86141e+07	22298.7	2.50423e+06	1.87393e+06
PC(42:11)pH	PC	2.02559e+08	8.62588e+07	1.9805e+08	2.19938e+08	1.46065e+08	504199	1.24338e+07	1.4008e+07	8.18278e+07
PC(42:11)pH	PC	0	240928	0	887139	915204	2.43857e+08	2300.95	0	0
PC(42:1e)pH	PC	3.40127e+07	3.91584e+07	3.92372e+07	3.86725e+07	3.64382e+07	2.38991e+06	1.99786e+07	2.07614e+07	1.59033e+07
PC(18:1/24:1)pHCOO	PC	4.48721e+08	4.41407e+08	4.94176e+08	3.29091e+08	4.3644e+08	1.18715e+06	2.28062e+08	2.25519e+08	2.2605e+08
PC(42:2)pH	PC	5.09988e+09	4.74922e+09	5.67108e+09	4.99423e+09	3.20842e+09	4.13878e+09	3.03286e+09	2.88257e+09	3.43275e+09
PC(18:1/24:1)pHCOO	PC	4.29057e+07	5.18204e+07	2.90996e+07	6.45912e+07	8.93954e+07	2.44107e+07	4.86846e+07	3.09195e+07	2.18139e+07
PC(42:2e)pH	PC	1.05717e+08	5.85974e+07	1.07836e+08	7.85066e+07	1.0934e+08	2.59303e+06	5.85066e+07	6.72594e+07	7.46149e+07
PC(18:1p/24:1)pHCOO	PC	3.49711e+06	336515	117435	181404	2.02528e+06	41213.7	184827	503033	158715
PC(42:2p)pH	PC	8.82576e+07	1.19272e+08	1.92118e+08	9.40466e+07	6.87502e+07	3.82252e+07	1.36598e+08	8.71006e+07	1.14674e+08
PC(18:1/24:2)pHCOO	PC	1.30737e+08	1.28106e+08	1.87289e+08	1.22742e+08	1.30746e+08	2.3363e+06	7.41115e+07	8.15161e+07	1.00701e+08
PC(42:3)pH	PC	1.47319e+09	1.58472e+09	1.63696e+09	1.01159e+09	1.18186e+09	9.67029e+08	1.05075e+09	1.05677e+09	1.21961e+09
PC(18:1/24:2)pHCOO	PC	206618	1.92409e+06	1.46899e+06	1.20535e+07	2.96332e+07	1.17655e+07	367891	6.90919e+06	226326
PC(42:3p)pH	PC	1.01847e+08	1.55891e+08	1.39763e+08	8.72002e+07	7.27736e+07	3.02093e+08	3.993e+08	3.7395e+08	3.26106e+08
PC(24:2/18:2)pHCOO	PC	7.57433e+07	7.88317e+07	6.47407e+07	5.67099e+07	5.97273e+07	2.1145e+06	3.91218e+07	1.05563e+07	1.69532e+07
PC(42:4)pH	PC	9.10659e+08	7.54372e+08	9.72255e+08	8.04156e+08	7.16726e+08	8.7634e+07	5.52413e+08	7.51192e+08	7.91956e+08
PC(24:4/18:0)pHCOO	PC	416757	4.66508e+06	1.37548e+07	1.06691e+06	2.80637e+07	2.01927e+07	9.86599e+06	1.30718e+06	1.9003e+07
PC(42:4)pH	PC	5.42153e+07	1.74579e+08	6.97016e+07	5.2431e+07	4.35994e+07	5.32352e+08	2.9089e+08	5.13087e+07	4.94503e+06
PC(42:4p)pH	PC	2.75636e+08	2.17086e+08	2.11677e+08	1.52741e+08	2.46909e+08	2.6918e+08	2.43808e+08	2.19812e+08	3.1785e+08
PC(24:4/18:1)pHCOO	PC	1.01215e+08	4.38822e+07	1.06551e+08	1.03381e+08	9.43842e+07	350194	6.56418e+06	7.42844e+07	6.78401e+07
PC(42:5)pH	PC	1.12461e+09	1.25549e+08	1.19036e+09	1.1214e+09	1.03694e+09	5.08005e+07	1.0661e+09	2.05867e+08	1.19825e+09
PC(24:4/18:1)pHCOO	PC	9.61257e+06	9.56436e+06	7.49762e+06	1.21143e+07	2.26205e+07	8.50983e+07	4.60176e+06	1.33591e+07	8.63304e+06
PC(42:5)pH	PC	9.84959e+07	2.35621e+08	1.38393e+07	2.84509e+08	3.68358e+08	7.95816e+08	8.03975e+07	2.80102e+08	1.82583e+07
PC(20:0e/22:5)pHCOO	PC	1.08322e+07	1.28394e+07	2.00007e+07	1.07443e+07	1.20934e+07	6.55092e+06	1.56635e+07	1.30585e+07	1.77922e+07
PC(20:0p/22:5)pHCOO	PC	0	0	0	0	0	6.35336e+06	303579	0	0
PC(24:5/18:1)pHCOO	PC	991367	3.3392e+07	3.55171e+07	4.28308e+07	1.14406e+07	1.09799e+06	2.74802e+07	1.68009e+07	3.05386e+07
PC(42:6)pH	PC	5.41276e+08	3.13275e+08	7.03719e+08	5.47606e+08	4.39169e+08	1.56744e+07	3.54741e+08	3.37412e+08	3.81617e+08
PC(22:2/20:4)pHCOO	PC	1.20664e+07	8.67759e+06	7.94427e+06	1.28699e+06	4.16796e+06	1.003e+06	2.24178e+06	364850	1.29776e+07
PC(42:6)pH	PC	1.97098e+08	1.88486e+08	4.17695e+08	3.74649e+08	1.33762e+08	1.63959e+07	5.98963e+07	3.29133e+07	1.38869e+08
PC(24:5/18:1)pHCOO	PC	784050	1.37685e+06	1.51439e+06	455199	2.86036e+06	2.97979e+07	2.41023e+06	775577	684579
PC(42:6)pH	PC	1.27711e+08	7.87584e+07	4.17695e+08	3.74649e+08	1.11917e+08	4.75953e+08	4.45655e+07	3.66355e+08	1.35358e+08
PC(42:6e)pH	PC	1.73932e+06	6.87015e+06	1.10932e+07	3.73577e+06	1.05779e+07	0	4.15103e+07	1.29225e+07	6.39418e+07
PC(20:0e/22:6)pHCOO	PC	9.40141e+06	6.97017e+06	1.2539e+07	1.36697e+07	1.47088e+07	385838	1.48451e+07	1.25754e+07	1.28606e+07
PC(42:6e)pH	PC	2.3132e+08	2.2226e+08	3.09667e+08	1.62087e+08	1.77806e+08	6.55825e+06	2.67113e+08	5.8147e+07	3.05581e+08
PC(42:6e)pH	PC	1.81547e+07	81586.9	39968.6	2.32336e+07	3.67494e+07	1.71969e+08	789587	29574.3	98336.5
PC(18:1/24:6)pHCOO	PC	1.16917e+07	8.30045e+06	2.51049e+07	8.82785e+06	8.98847e+06	2.38048e+06	1.29762e+06	3.22634e+06	3.51069e+06
PC(18:1/24:6)pH	PC	2.65467e+08	2.65066e+08	2.5941e+08	2.33832e+08	2.40579e+08	3.19278e+07	1.81443e+08	1.34903e+08	1.61979e+08
PC(20:1/22:6)pHCOO	PC	4.24951e+07	4.93569e+07	5.95376e+07	6.72252e+07	4.86155e+07	4.09749e+06	4.56906e+07	3.58693e+07	4.35785e+07
PC(42:7)pH	PC	7.85345e+08	6.85614e+08	7.9993e+08	7.95698e+08	5.69392e+08	9.7349e+07	5.94408e+08	1.0214e+09	6.44095e+08
PC(18:1/24:6)pHCOO	PC	814390	4.66239e+06	1.36382e+06	1.22128e+07	1.90361e+07	1.17072e+07	1.26842e+07	2.69909e+06	947102
PC(42:7)pH	PC	5.39902e+08	7.29007e+08	5.6218e+08	7.90075e+08	6.06286e+08	2.50248e+08	6.73024e+08	5.0683e+08	5.81772e+08
PC(42:7e)pH	PC	2.32102e+07	8.51367e+06	2.5009e+07	1.86892e+07	31636.9	0	613759	1.17057e+07	3.62088e+07
PC(42:7e)pH	PC	2.93478e+07	2.42696e+07	4.43201e+07	3.17236e+07	3.89862e+07	1.07874e+07	3.31304e+07	2.53411e+07	3.05668e+07
PC(42:7p)pH	PC	1.6863e+06	27019.1	25079.6	47847.4	1.2179e+06	655597	2.05366e+07	1.07272e+07	91308.6
PC(22:4/20:4)pHCOO	PC	8.20441e+06	4.82957e+06	1.1202e+07	9.38429e+06	5.6242e+06	4.88149e+06	305203	290989	747667
PC(42:8)pH	PC	5.10717e+08	3.83043e+08	5.77082e+08	4.39256e+08	6.71759e+08	8.51769e+07	1.10285e+08	9.78522e+07	2.22782e+08
PC(22:4/20:4)pHCOO	PC	0	99517.5	0	0	0	9.10431e+06	0	80916.1	397308
PC(42:8)pH	PC	3.66164e+06	1.92427e+06	0	1.36613e+06	2.69171e+06	4.70264e+08	1.67487e+06	637943	754346
PC(22:5/20:4)pHCOO	PC	5.44797e+07	3.85943e+06	5.46869e+07	4.26039e+07	3.67021e+07	109949	3.5391e+06	2.56898e+06	2.83641e+06
PC(42:9)pH	PC	1.02866e+09	5.20777e+08	1.53525e+09	8.79752e+08	7.31581e+08	1.38249e+07	1.78973e+08	6.85654e+07	2.65035e+08
PC(22:5/20:4)pHCOO	PC	30174.4	44988.7	0	77265	0	4.02603e+07	32418.7	28114.2	0
PC(42:9)pH	PC	8.50843e+06	5.22922e+06	2.4727e+06	2.21771e+06	2.79634e+07	1.17022e+09	5.65995e+06	1.05255e+06	5.70713e+06
PC(25:0/18:1)pHCOO	PC	6.82121e+06	6.8915e+06	6.9492e+06	4.53322e+06	5.86693e+06	5.21227e+06	1.70037e+06	761141	3.82174e+06
PC(43:1)pH	PC	6.35016e+07	8.17881e+07	7.44959e+07	8.28464e+07	7.30523e+07	1.11192e+08	4.5667e+07	4.8503e+07	5.81629e+07
PC(43:11)pH	PC	1.67113e+07	2.07777e+07	1.05482e+07	2.35045e+07	1.07822e+07	0	7.19155e+06	1.18201e+07	9.0564e+06
PC(25:1/18:1)pHCOO	PC	1.09996e+07	1.36398e+07	1.00575e+07	1.43056e+07	1.65983e+07	1.16913e+06	5.14896e+06	4.82305e+06	1.13144e+07
PC(43:3)pH	PC	1.09278e+08	1.20777e+08	1.03442e+08	8.27218e+07	6.24015e+07	9.1259e+07	3.57141e+07	4.79487e+07	5.92924e+07
PC(43:4e)pH	PC	4.87561e+06	1.81873e+07	2.46811e+07	1.88189e+07	2.43586e+07	2.11421e+06	1.43111e+07	9.00197e+06	3.00379e+07
PC(43:5)pH	PC	6.34313e+06	403962	240199	8.86184e+06	8.63517e+06	1.23002e+06	1.82091e+06	5.30276e+06	4.12024e+06
PC(43:5)pH	PC	6.36598e+07	6.3034e+07	6.03625e+07	9.97282e+07	6.48968e+07	1.33666e+07	5.18957e+07	4.5558e+07	5.08823e+07
PC(26:0/18:1)pHCOO	PC	4.54983e+07	5.23729e+07	6.14071e+07	5.13479e+07	5.02439e+07	3.79572e+07	2.35256e+07	2.53934e+07	1.6333e+07
PC(44:1)pH	PC	5.28421e+08	6.01564e+08	5.97687e+08	5.80843e+08	6.86866e+08	7.3373e+08	6.17819e+07	2.826e+08	3.13154e+08
PC(26:0/18:1)pHCOO	PC	4.33537e+07	4.97909e+07	4.26683e+07	4.86363e+07	5.08983e+07	4.1493e+07	5.90506e+06	2.39227e+07	2.42627e+07
PC(22:5/22:5)pHCOO	PC	3.49418e+06	2.64764e+06	6.34633e+06	751695	657982	0	3362.53	0	0
PC(44:10)pH	PC	1.5251e+08	1.56844e+08	1.7699e+08	2.00227e+08	9.50262e+07	171285	2.43566e+07	2.73947e+07	3.6392e+07
PC(22:4/22:6)pHCOO	PC	8.92814e+06	2.07849e+06	6.6665e+06	1.46882e+06	4.51686e+06	643459	535536	205996	632846
PC(44:10)pH	PC	2.00253e+08	2.05133e+08	2.29429e+08	2.54124e+08	1.42759e+08	29079238	5.40728e+07	9.66381e+06	6.5975e+07
PC(22:4/22:6)pHCOO	PC	0	0	0	0	0	7.37071e+06	0	0	0
PC(44:10)pH	PC	7.82891e+06	722851	8.53732e+06	3.88008e+06	1.91377e+07	2.33951e+08	768222	610363	861885
PC(22:5/22:6)pHCOO	PC	1.04444e+07	985309	1.29259e+07	1.15848e+07	4.97602e+06	0	7767.13	132593	1.08151e+06
PC(44:11)pH	PC	2.3449e+08	2.31475e+08	3.20051e+08	2.69892e+08	2.05385e+08	2045.79	1.83123e+07	1.88797e+07	4.68158e+07
PC(22:5/22:6)pHCOO	PC	0	39977.2	0	0	0	1.21028e+07	0	129880	0
PC(44:11)pH	PC	713964	6.05864e+06	2.9916e+06	3.77691e+06	764772	2.46375e+08	67265.7	810321	1.47079e+06
PC(22:6/22:6)pHCOO	PC	7.17734e+06	1.20346e+07	1.45541e+07	9.8367e+06	5.82899e+06	0	1.20492e+06	728654	1.85394e+06
PC(22:6/22:6)pNa	PC	1.61071e+07	4.16064e+07	2.64138e+06	6.09748e+07	2.751e+07	0	3.01323e+07	1.4268e+06	1.9287e+07
PC(44:12)pH	PC	1.39979e+08	5.63164e+07	3.83195e+08	2.91121e+08	1.5191e+08	0	1.50561e+07	1.3597e+07	3.57827e+07
PC(22:6/22:6)pHCOO	PC	0	0	0	3231.85	0	9.4896e+06	0	0	0
PC(22:6/22:6)pNa	PC	0	182733	0	0	0	5.58564e+07	432198	510760	0
PC(44:12)pH	PC	3.53738e+07	4.11317e+07	2.44523e+07	3.02226e+07	1.02452e+06	3.06309e+08	8.7784e+06	5.55553e+07	3.18589e+07
PC(44:12)pH	PC	2.8543e+07	5.77796e+07	6.57637e+07	1.16553e+08	6.58848e+07	2.7664e+08	6.24755e+07	1.38885e+07	5.81e+07
PC(26:1/18:1)pHCOO	PC	1.85104e+08	1.8856e+08	2.1377e+08	2.24653e+08	1.71385e+08	1.66054e+08	1.15445e+08	9.52217e+07	1.05762e+08
PC(44:2)pH	PC	2.239e+09	2.07858e+09	3.03082e+09	2.15062e+09	2.10614e+09	2.21118e+09	9.96656e+08	1.019e+09	1.31398e+09
PC(44:2p)pH	PC	2.41985e+08	5.27792e+07	2.8622e+08	6.50566e+07	2.23621e+08	1.45616e+08	2.2097e+08	4.16811e+07	5.52096e+07
PC(26:2/18:1)pHCOO	PC	1.44366e+08	1.46596e+08	1.62746e+08	1.24412e+08	1.62414e+08	1.41621e+08	8.30455e+07	7.30484e+07	6.39819e+07
PC(44:3)pH	PC	1.73307e+09	1.66369e+09	1.72957e+09	1.58476e+09	1.22256e+09	1.32641e+09	1.00771e+09	9.49428e+08	1.04446e+09
PC(44:3p)pH	PC	9.15392e+07	4.21406e+07	6.71828e+07	1.0629e+08	6.39797e+07	3.73581e+07	2.98254e+07	2.7389e+07	7.57755e+07
PC(44:3p)pH	PC	8.17535e+07	4.70707e+07	3.87795e+09	5.36769e+07	5.3801e+07	4.96057e+07	2.6889e+09	1.34014e+07	2.6513e+09
PC(26:3/18:1)pHCOO	PC	3.5469e+07	3.03672e+07	5.27328e+07	5.88883e+07	3.77334e+07	2.62978e+07	2.6201e+07	2.19017e+07	2.60239e+07
PC(44:4)pH	PC	3.84038e+08	3.73636e+08	2.10716e+08	3.01979e+08	3.23435e+08	2.45995e+08	2.19808e+08	2.51167e+08	8.58023e+08
PC(24:1/20:4)pHCOO	PC	1.32407e+07	1.93942e+07	1.65842e+07	2.79211e+07	3.22358e+07	311383	1.9433e+07	9.89679e+06	1.73321e+07
PC(44:5)pH	PC	4.83216e+08	5.42635e+08	6.6901e+08	3.91431e+08	4.35672e+08	8.47625e+06	7.78006e+08	2.14789e+08	4.26994e+08
PC(44:5)pH	PC	3.11874e+08	2.66208e+07	4.21716e+08	2.00628e+07	2.26177e+07	7.0159e+08	3.78826e+08	2.82162e+07	3.73499e+08
PC(26:5/18:1)pHCOO	PC	4.56493e+06	6.2238e+06	7.17746e+06	453991	2.40969e+06	1.02337e+07	7.30313e+06	2.39512e+06	7.11705e+06
PC(44:6)pH	PC	2.02432e+08	5.36342e+07	1.22198e+08	1.01216e+08	3.4947e+08	779570	2.7807e+08	5.6374e+07	2.88542e+08
PC(24:1/20:5)pHCOO	PC	1.92517e+06	3.92213e+06	8.18741e+06	3.37691e+06	4.71535e+06	1.22975e+07	2.38746e+06	1.1385e+06	6.01172e+06
PC(44:6)pH	PC	8.15471e+07	7.30636e+07	7.78994e+07	3.88929e+07	1.10805e+08	2.42847e+08	8.06378e+07	5.94138e+07	6.38002e+07
PC(44:6e)pH	PC	7.35809e+07	8.53833e+07	9.48968e+07	3.59064e+07	3.11469e+06	6.31796e+06	7.63282e+07	7.842e+07	1.0046e+08
PC(24:3/20:4)pHCOO	PC	482925	769358	2.45256e+06	704699	12290.2	2797.52	111208	344785	327042
PC(44:7)pH	PC	2.82387e+07	3.75769e+07	4.92361e+06	5.80213e+07	5.50671e+07	1.43969e+06	6.14792e+06	9.10268e+06	4.55678e+07
PC(22:1/22:6)pHCOO	PC	977091	1.48748e+06	9.32264e+06	9.3227e+06	8.9159e+06	716132	4.62448e+06	25980.6	5.55201e+06
PC(44:7)pH	PC	7.02637e+07	3.61449e+07	9.56753e+07	8.6468e+07	1.72324e+06	6.91562e+06	7.28198e+07	3.0489e+07	1.00498e+08
PC(22:1/22:6)pHCOO	PC	147071	1.45301e+06	0	5207.73	0	3.51796e+06	0	962868	792514
PC(44:7)pH	PC	0	0	0	0	0	6.78641e+07	0	26533.4	0
PC(24:4/20:4)pHCOO	PC	2.28319e+06	529596	3.87165e+06	2.06486e+06	2.15766e+06	127051	354444	128145	845967
PC(44:8)pH	PC	2.0842e+07	8.87979e+06	2.28259e+07	9.38603e+06	2.00101e+07	9.8023e+06	3.45985e+07	1.8539e+07	4.97538e+07
PC(22:2/22:6)pHCOO	PC	2.03035e+06	383336	448207	424814	1.12113e+06	317100	12880.6	1893.44	3207.07
PC(44:8)pH	PC	2.74583e+07	2.05572e+07	4.4776e+07	2.63804e+07	2.47636e+07	2.40124e+06	1.34039e+07	1.98873e+07	2.67241e+07
PC(44:8)pH	PC	0	0	0	0	0	5.68212e+07	0	0	0
PC(22:4/22:5)pHCOO	PC	3.93683e+06	2.48521e+06	3.82714e+06	4.657e+06	4.33154e+06	162049	175382	0	389960
PC(44:9)pH	PC	1.35611e+08	1.37951e+08	1.89535e+08	1.08573e+08	1.21e+08	9.74737e+06	3.07592e+07	1.34303e+07	5.07429e+07
PC(22:4/22:5)pHCOO	PC	0	0	0	0	0	4.30359e+06	0	0	0
PC(44:9)pH	PC	0	0	0	0	0	1.1165e+08	0	0	0
PC(45:13)pH	PC	468084	2.47512e+06	632829	1.04287e+07	4.32919e+06	0	1.80749e+06	525883	3.11889e+06
PC(27:1/18:1)pHCOO	PC	2.39911e+06	3.12762e+06	3.6032e+06	2.47052e+06	1.67192e+06	9905.68	14020.1	945064	1.44476e+06
PC(28:0/18:1)pHCOO	PC	1.32053e+06	2.0349e+06	1.54909e+06	2.07079e+06	287354	253298	836229	820296	821506
PC(46:1)pH	PC	2.31703e+07	2.48828e+07	2.8829e+07	2.59863e+07	2.22827e+07	8.27805e+06	9.99083e+06	9.31717e+06	2.27592e+07
PC(46:10)pH	PC	8893.11	1.11358e+07	1.53921e+06	3.24831e+06	3.61377e+06	0	1.49962e+06	2.22664e+06	42216.8
PC(46:11)pH	PC	1.04546e+07	2.31992e+07	5.0767e+07	2.81308e+07	2.49641e+07	0	4.30818e+06	1.65094e+07	9.38601e+06
PC(46:11)pH	PC	0	550408	0	0	0	4.64412e+07	594051	130338	0
PC(46:13)pH	PC	7.30692e+07	1.45994e+07	8.25399e+07	7.16584e+07	4.02969e+07	0	1.22247e+07	9.15266e+07	6.84069e+07
PC(22:6/24:7)pH	PC	7.22774e+06	1.98518e+07	5.41682e+07	1.27761e+08	3.95635e+07	1.12663e+08	2.11932e+07	4.1128e+07	2.77456e+07
PC(28:1/18:1)pHCOO	PC	5.12294e+06	5.8458e+06	1.55914e+07	7.08991e+06	1.39885e+07	1.09915e+07	3.95479e+06	4.20472e+06	4.29067e+06
PC(46:2)pH	PC	8.09254e+07	1.58667e+08	2.02996e+08	9.94845e+07	1.27237e+08	1.75308e+08	4.30554e+07	4.39146e+07	1.11956e+08
PC(28:2/18:1)pHCOO	PC	9.3358e+06	1.82352e+07	1.61931e+07	9.86012e+06	1.30873e+07	1.36673e+07	6.10177e+06	6.00837e+06	7.178e+06
PC(46:3)pH	PC	1.65993e+08	1.51825e+08	2.71077e+08	1.22006e+08	1.57562e+08	1.95532e+08	9.74635e+07	7.21494e+07	1.15331e+08
PC(26:0/20:4)pHCOO	PC	1.46738e+07	1.45413e+07	2.34567e+06	8.535e+06	1.5363e+07	1.50264e+07	1.23469e+07	9.804e+06	1.07337e+07
PC(46:4)pH	PC	2.24866e+08	1.95862e+08	2.36655e+08	2.17732e+08	2.78398e+08	1.88913e+08	1.46069e+08	8.02285e+07	1.86247e+08
PC(26:0/20:4)pHCOO	PC	128217	1.12155e+07	273461	1.56726e+07	1.04393e+07	8.97241e+06	666887	759441	665882
PC(46:4)pH	PC	1.28164e+08	1.39458e+07	1.73299e+08	1.17804e+08	1.40611e+08	1.26974e+08	7.28937e+07	1.06247e+07	1.39057e+08
PC(26:1/20:4)pHCOO	PC	3.24596e+07	4.11891e+07	3.71857e+07	2.33697e+07	4.99428e+07	4.25489e+07	3.11847e+07	2.90642e+07	2.83341e+07
PC(46:5)pH	PC	5.37058e+08	4.38672e+08	4.99265e+08	4.66484e+08	4.14707e+08	4.5357e+08	8.65167e+07	4.33163e+08	3.17921e+08
PC(24:1/22:5)pHCOO	PC	1.89587e+07	1.38383e+07	1.5341e+07	1.23142e+07	4.501e+06	219038	2.7213e+06	1.06918e+07	2.18686e+07
PC(46:6)pH	PC	2.00567e+08	8.36943e+07	2.19642e+08	4.81082e+07	1.98282e+08	2.79764e+06	1.64891e+08	7.30799e+07	1.70899e+08
PC(24:1/22:6)pHCOO	PC	1.57455e+07	1.26241e+07	1.30192e+07	1.54512e+07	1.47145e+07	7.71135e+06	1.09428e+07	8.21992e+06	9.01907e+06
PC(46:7)pH	PC	2.34765e+08	1.9487e+08	2.40325e+08	1.61057e+08	1.72654e+08	1.93057e+08	1.62006e+08	1.27603e+08	1.69243e+08
PC(46:8)pH	PC	2.44312e+07	1.91866e+06	1.13688e+07	8.34495e+06	102050	0	134365	3.63972e+06	6.26513e+06
PC(46:8)pH	PC	0	0	0	0	0	3.43158e+06	0	0	0
PC(46:9)pH	PC	1.97304e+07	1.71481e+07	7.02111e+06	5.76211e+06	1.14623e+06	0	91916.7	5.37815e+06	1.08971e+07
PC(46:9)pH	PC	0	0	0	0	0	1.18496e+07	0	0	0
PC(48:5)pH	PC	5.74009e+07	1.00365e+08	3.89925e+07	1.11838e+08	6.94974e+07	4.20501e+07	5.21468e+07	5.86055e+07	3.81018e+07
PC(26:1/22:5)pHCOO	PC	7.45666e+06	6.54017e+06	9.62072e+06	5.94685e+06	7.97587e+06	8.46803e+06	4.81453e+06	4.93715e+06	5.88463e+06
PC(26:1/22:6)pHCOO	PC	9.48526e+06	9.3267e+06	1.27321e+07	1.10767e+07	1.23683e+07	784616	7.01051e+06	3.12834e+06	5.93787e+06
PC(48:7)pH	PC	1.38149e+08	1.67983e+08	1.7285e+08	1.28457e+08	1.13417e+08	1.33162e+08	6.93361e+07	7.09279e+07	7.31614e+07
PC(48:8)pH	PC	3.5391e+07	4.95564e+07	5.70755e+07	3.2089e+07	4.34801e+07	4.18416e+07	2.7991e+07	2.04746e+07	2.66102e+07
PC(50:4)pCH3COO	PC	21003.9	647118	1.22776e+06	388284	0	24487	0	966842	0
PE(16:0e)pNa	PE	3.15615e+06	2.5318e+06	1.22389e+06	894716	507873	0	1191.47	2286.14	2455.55
PE(16:0e)pNa	PE	1.79142e+07	1.66589e+07	1.92044e+07	1.25866e+07	1.14412e+07	1.29436e+06	5.57665e+06	2.95622e+06	5.92299e+06
PE(16:0e)pH	PE	5.31522e+08	6.76637e+08	6.56812e+08	4.40961e+08	3.2581e+08	5.47108e+07	1.60416e+08	1.23648e+08	1.33069e+08
PE(16:0e)pNa	PE	0	0	1227.82	0	0	1.298e+07	0	0	0
PE(16:0e)pH	PE	282022	553563	350646	345034	196729	3.85464e+08	2321.11	73770.3	54264.6
PE(16:0p)pH	PE	4.72596e+07	5.94436e+07	6.54952e+07	3.06241e+07	1.92723e+07	67493.2	1.43552e+07	1.26032e+07	1.34718e+07
PE(16:0p)pNa	PE	5.05946e+06	1.04061e+07	7.6888e+06	8.45839e+06	2.81945e+06	444287	2.76114e+06	5.57786e+06	4.13458e+06
PE(16:0p)pH	PE	1.47746e+08	1.98947e+08	1.65202e+08	7.45995e+07	4.95271e+07	2.10049e+07	3.34854e+07	3.0862e+07	3.66167e+07
PE(17:0e)pH	PE	7.08987e+06	3.34984e+07	3.39854e+07	6.51795e+06	1.81178e+07	1.26608e+06	1.09794e+07	8.95374e+06	1.03485e+07
PE(17:0e)pH	PE	0	0	0	0	27846.1	1.78964e+07	0	0	0
PE(18:0e)pNa	PE	4.58364e+07	5.42505e+07	5.33558e+07	3.60539e+07	6.37273e+06	0	3.78648e+06	1.89755e+07	2.1392e+07
PE(18:0e)pH	PE	1.92335e+08	3.36371e+08	2.95127e+08	1.57069e+08	1.18176e+08	122196	7.79802e+07	7.73636e+07	7.84771e+07
PE(18:0e)pNa	PE	4.38532e+07	4.60934e+07	3.4529e+07	3.29745e+07	3.513e+07	722386	2.36542e+07	1.45477e+07	1.73241e+07
PE(18:0e)pH	PE	1.04046e+09	1.44711e+09	1.3238e+09	9.64864e+08	7.6816e+08	1.37381e+07	4.3634e+08	4.06152e+08	3.91463e+08
PE(18:0e)pNa	PE	0	0	0	0	0	3.55799e+07	0	0	0
PE(18:0e)pH	PE	4.47697e+06	1.59816e+06	3.72822e+06	2.11829e+06	6.50465e+06	8.50687e+08	1.80498e+06	68853.4	295511
PE(18:0p)pNa	PE	1.16037e+08	1.5778e+08	1.69257e+08	1.04025e+08	5.75206e+07	506783	7.69873e+07	9.00555e+07	7.5521e+07
PE(18:0p)pNa	PE	2.76434e+08	5.91208e+08	4.43205e+08	1.6405e+08	1.12906e+08	6.0527e+07	1.69688e+08	2.80286e+08	2.19712e+08
PE(18:0p)pNa	PE	1.75195e+07	1.91782e+07	1.50594e+07	1.12269e+07	8.45169e+06	908036	7.73294e+06	6.33149e+06	4.57103e+06
PE(18:0p)pH	PE	4.87324e+08	6.61042e+08	5.65823e+08	3.03314e+08	2.39672e+08	0	1.58915e+08	1.39085e+08	1.35664e+08
PE(18:0p)pH	PE	1.41047e+09	1.95824e+09	1.7487e+09	8.7045e+08	7.49406e+08	1.36572e+08	4.49011e+08	3.64205e+08	4.31325e+08
PE(18:0p)pH	PE	1.57307e+09	2.26787e+09	1.93799e+09	9.4905e+08	7.76608e+08	2.41178e+08	4.88122e+08	4.09277e+08	4.94263e+08
PE(19:0e)pH	PE	4.25099e+06	2.74061e+06	4.99851e+06	4.00118e+06	4.15334e+06	2.88009e+06	2.92967e+06	2.72995e+06	2.27837e+06
PE(19:0e)pH	PE	6.06455e+06	6.37685e+06	8.06496e+06	6.30876e+06	4.55971e+06	2.88009e+06	3.22413e+06	2.50827e+06	2.50974e+06
PE(4:0/15:2)nH	PE	6.39311e+06	6.20039e+06	6.10837e+06	4.3267e+06	4.69174e+06	0	4.27428e+06	4.0055e+06	3.73525e+06
PE(4:0/15:2)nH	PE	0	0	0	0	0	566436	0	0	0
PE(20:0e)pNa	PE	4.25012e+06	7.27203e+06	5.35644e+06	4.64257e+06	3.55745e+06	1.63852e+06	4.35326e+06	5.54345e+06	3.97905e+06
PE(20:0e)pH	PE	3.41709e+06	5.26159e+07	4.4769e+07	3.88304e+07	3.76766e+07	0	2.52241e+07	2.40212e+06	2.21518e+07
PE(20:0e)pH	PE	0	23716.1	0	0	0	3.89899e+07	0	0	0
PE(20:0p)pNa	PE	2.70504e+07	3.80621e+07	3.98144e+07	3.80829e+07	2.24877e+07	1.16433e+06	2.17217e+07	2.97401e+07	2.25228e+07
PE(20:0p)pNa	PE	794592	773670	217719	74028	197350	3.33686e+07	486234	505508	107415
PE(20:0p)pNa	PE	2.74539e+06	4.24934e+06	1.98764e+06	2.60971e+06	3.40778e+06	0	1.56607e+06	201579	902376
PE(20:0p)pH	PE	1.05746e+08	1.40133e+08	1.21365e+08	9.58824e+07	6.86245e+07	232803	4.24742e+07	4.62239e+07	3.9043e+07
PE(20:0p)pH	PE	4.26276e+06	2.05279e+06	1.7255e+06	1.91727e+06	171070	8.9822e+07	1.2541e+06	13006.5	626705
PE(4:0/17:2)nH	PE	4.35656e+06	5.16766e+06	5.37511e+06	3.48262e+06	3.82042e+06	0	2.45185e+06	2.46775e+06	2.93891e+06
PE(4:0/17:2)nH	PE	0	0	0	0	0	3.34549e+06	0	0	0
PE(4:0/17:3)nH	PE	3.92432e+06	3.98267e+06	4.05323e+06	3.11863e+06	3.28654e+06	0	2.46089e+06	2.29031e+06	3.48739e+06
PE(4:0/17:3)nH	PE	9496.6	0	0	0	0	2.36093e+06	0	0	0
PE(22:0e)pH	PE	1.19857e+07	1.79891e+07	2.38124e+07	2.44292e+07	1.02984e+07	55335.1	1.66074e+07	1.55321e+07	8.81054e+06
PE(22:0e)pH	PE	1316.66	0	0	0	0	1.71384e+07	0	0	0
PE(22:0p)pNa	PE	9.91385e+06	1.55834e+07	1.28243e+07	1.36974e+07	7.58696e+06	0	1.27693e+06	2.71866e+06	8.21964e+06
PE(22:0p)pNa	PE	0	0	0	46019.5	0	4.15552e+06	0	0	0
PE(22:0p)pH	PE	6.28214e+07	6.24723e+07	5.11345e+07	5.08856e+07	4.09109e+07	0	2.77723e+07	1.88442e+06	4.05516e+07
PE(22:0p)pH	PE	0	0	75953.3	0	41394.9	4.59929e+07	0	68168.6	0
PE(22:1p)pNa	PE	2.09442e+06	8.22934e+06	7.99144e+06	2.94453e+06	2.18265e+06	0	4.37201e+06	6.28917e+06	4.87564e+06
PE(22:1p)pNa	PE	0	0	0	0	452.451	7.85834e+06	0	0	0
PE(22:1p)pH	PE	3.5427e+06	5.47307e+06	4.17024e+06	5.05534e+06	3.26075e+06	32157.1	115152	3.202e+06	2.31199e+06
PE(23:0p)pH	PE	2.75499e+06	2.22618e+06	3.01193e+06	3.24011e+06	2.39832e+06	0	1.17393e+06	1.24412e+06	358935
PE(4:0/19:2)nH	PE	4.41933e+06	1.42284e+06	4.05366e+06	3.51104e+06	4.67958e+06	0	2.55975e+06	1.82265e+06	2.38035e+06
PE(24:0e)pH	PE	1.18543e+07	3.80083e+06	9.25453e+06	5.8179e+06	2.22563e+06	0	386806	3.4377e+06	2.25164e+07
PE(10:0p/14:0)pH	PE	1.01054e+07	1.69615e+07	1.03851e+07	1.44646e+07	1.20282e+07	0	1.96966e+07	1.04364e+07	4.35833e+06
PE(10:0p/14:0)pH	PE	0	0	0	219424	726047	1.55924e+07	334634	112827	0
PE(24:1e)pH	PE	4.75022e+07	9.88693e+07	8.61606e+07	1.17903e+08	4.44498e+07	50603.6	4.56205e+07	4.75678e+07	2.82731e+07
PE(10:0p/16:0)pH	PE	7.5688e+06	1.02963e+07	1.78765e+07	6.11642e+06	2.32916e+06	0	973173	2.71194e+06	8.36624e+06
PE(10:0p/16:0)nH	PE	2.44998e+06	1.82669e+06	3.73911e+06	6199.4	2.6802e+06	0	222058	1.0582e+06	1.14785e+06
PE(26:2e)pH	PE	1.90289e+06	6.53467e+06	1.13975e+06	4.06583e+06	309897	0	428359	785977	339607
PE(14:0/14:0)pH	PE	4.80914e+07	3.24088e+07	3.6547e+07	2.63135e+07	1.27187e+07	3.0473e+06	2.55938e+06	2.61925e+06	629480
PE(14:0/14:0)nH	PE	7.41004e+06	520587	9.85845e+06	7.31207e+06	6.43382e+06	26476.2	326568	244164	158208
PE(14:0/14:0)pH	PE	0	0	0	0	0	3.3871e+07	0	0	0
PE(14:0/14:0)nH	PE	0	0	0	0	2968.34	9.99031e+06	0	0	0
PE(12:0p/16:0)nH	PE	1.24067e+07	988785	1.51959e+07	1.38074e+07	1.0618e+07	0	3.4442e+06	3.41736e+06	5.41648e+06
PE(12:0p/16:0)pH	PE	4.1485e+07	4.3888e+07	4.27582e+07	3.81272e+07	61619.9	0	1.8468e+06	7.47682e+06	1.69351e+07
PE(12:0p/16:0)nH	PE	0	0	0	0	0	8.70748e+06	0	0	0
PE(12:0p/16:0)pH	PE	0	0	0	0	0	4.17903e+07	0	0	0
PE(12:0p/16:1)pH	PE	7.88464e+06	1.92343e+07	1.01216e+07	9.38765e+06	4.78871e+06	0	1.02421e+07	888692	8.69855e+06
PE(12:0p/16:1)nH	PE	2.0458e+06	1.23448e+06	2.41826e+06	2.39118e+06	1.37849e+06	0	1.16606e+06	140620	662701
PE(28:1p)nH	PE	0	0	0	0	0	557173	0	0	0
PE(16:0/14:0)pH	PE	2.16448e+08	2.19447e+08	2.31385e+08	1.80106e+08	1.57922e+08	1.49529e+07	5.43867e+07	1.01871e+07	4.30847e+07
PE(16:0/14:0)nH	PE	9.60442e+07	1.3629e+07	1.10271e+08	1.05423e+08	86377365	0	1.68189e+07	4.58136e+06	2.17495e+07
PE(16:0/14:0)pH	PE	0	0	0	0	0	2.21982e+08	0	0	0
PE(16:0/14:0)nH	PE	0	0	0	0	0	1.05919e+08	0	0	0
PE(16:0p/14:0)nH	PE	1.64196e+07	1.91682e+07	1.41533e+07	1.74201e+07	1.11423e+07	0	7.61398e+06	6.35579e+06	8.11658e+06
PE(16:0p/14:0)pH	PE	3.13225e+07	1.83049e+07	2.0599e+07	29392.6	1.71056e+07	0	1.53867e+07	1.305e+07	2.8784e+07
PE(16:0p/14:0)nH	PE	0	0	0	0	0	1.49156e+07	0	0	0
PE(16:0p/14:0)pH	PE	0	0	0	0	0	2.57183e+07	0	0	0
PE(16:1/14:0)pH	PE	2.89451e+08	2.76063e+08	3.1699e+08	2.86112e+08	1.21312e+08	0	2.15622e+07	3.92887e+07	5.93332e+07
PE(16:1/14:0)nH	PE	6.29702e+07	3.44193e+06	7.15307e+07	7.1747e+07	5.04269e+07	0	2.46749e+06	902017	1.06597e+07
PE(16:1/14:0)pH	PE	0	165563	0	0	0	2.80945e+08	0	0	0
PE(16:1/14:0)nH	PE	0	0	0	90541	374925	6.40595e+07	24808	260966	0
PE(12:0p/18:1)nH	PE	1.42476e+06	1.47925e+06	2.08477e+06	131024	3.50518e+06	0	569789	3.2831e+06	3.74077e+06
PE(12:0p/18:1)pH	PE	1.80424e+07	1.19423e+07	1.77995e+07	7.49958e+06	68245.2	0	1.94883e+07	1.70997e+07	1.08441e+07
PE(12:0p/18:1)pH	PE	0	0	0	0	0	2.20722e+07	0	0	0
PE(16:1/14:1)nH	PE	1.57858e+06	2.22334e+06	3.56583e+06	1.74077e+06	1.5252e+06	0	14559.1	26504.7	22481
PE(16:1/14:1)nH	PE	0	0	0	0	0	2.32165e+06	0	0	0
PE(15:0/16:0)nH	PE	1.95516e+06	4.93766e+06	2.33004e+06	5.94979e+06	586154	0	218648	248382	1.73325e+06
PE(17:1/14:0)nH	PE	4.87272e+06	4.45935e+06	1.24367e+07	377113	6.16776e+06	0	1.70903e+06	314426	684948
PE(17:1/14:0)nH	PE	0	0	0	0	0	3.79537e+06	0	65.394	0
PE(16:0/16:0)pNa	PE	2.30224e+08	2.00151e+08	7.63269e+08	7.33275e+08	4.26452e+08	8.36564e+06	7.26956e+07	8.01885e+07	2.09436e+08
PE(16:0/16:0)pNa	PE	1.06733e+06	835268	0	1.22922e+07	3.24972e+07	4.53735e+08	1.32184e+07	119937	0
PE(16:0/16:0)pH	PE	2.53526e+08	6.62136e+07	2.53304e+08	2.29918e+08	1.76106e+08	678512	8.88025e+06	4.52967e+07	8.8708e+07
PE(16:0/16:0)nH	PE	1.27969e+08	1.21193e+08	1.34464e+08	1.39151e+08	1.099e+08	411188	4.18129e+07	3.55921e+07	4.90044e+07
PE(16:0/16:0)pH	PE	0	30045.2	0	459773	0	1.60154e+08	0	24204.7	0
PE(16:0/16:0)nH	PE	0	0	0	96380.4	0	5.85037e+07	0	0	0
PE(16:0e/16:0)nH	PE	2.44096e+07	2.39474e+07	1.78862e+07	2.04725e+07	3.48477e+06	603454	2.39257e+06	1.53871e+06	7.15011e+06
PE(32:0e)pH	PE	4.25848e+07	4.4228e+07	4.54962e+07	1.61581e+07	8.24934e+06	0	123097	3.47418e+06	3.00496e+06
PE(16:0p/16:0)nH	PE	1.45542e+08	1.42877e+08	1.51498e+08	1.58185e+08	1.50563e+08	1.38067e+06	2.92009e+07	1.71933e+07	2.55458e+07
PE(16:0p/16:0)pH	PE	2.10232e+08	1.92905e+08	2.32486e+08	1.94584e+08	1.91784e+08	0	4.89857e+07	6.17055e+07	6.34188e+07
PE(16:0p/16:0)nH	PE	0	0	0	479152	5.81618e+06	8.67436e+07	245187	0	0
PE(16:0p/16:0)pH	PE	0	0	0	3493.36	0	1.15134e+08	0	0	0
PE(18:1/14:0)pH	PE	1.82851e+09	2.0036e+09	2.11531e+09	2.28327e+09	1.65072e+09	5.69999e+06	8.92154e+08	6.03915e+08	9.591e+08
PE(18:1/14:0)nH	PE	9.19728e+08	1.3412e+07	9.90013e+08	1.08547e+09	8.48629e+08	247836	3.31402e+08	1.66021e+06	3.67092e+08
PE(18:1/14:0)pH	PE	3.27556e+06	7.99748e+06	0	1.23278e+07	1.5619e+06	2.08999e+09	4.11527e+06	645158	0
PE(18:1/14:0)nH	PE	2.07094e+06	4.49593e+06	1.3056e+06	5.33082e+06	7.94302e+06	1.05808e+09	1.96829e+06	700030	379791
PE(16:0p/16:1)nH	PE	6.46961e+07	1.17963e+08	1.21145e+08	1.1866e+08	5.00531e+07	0	9.91239e+07	6.29432e+07	9.78636e+07
PE(16:0p/16:1)pH	PE	7.33585e+06	9.48018e+06	5.92313e+07	8.70461e+07	7.03745e+07	0	1.46111e+08	1.85544e+08	1.6376e+08
PE(16:0p/16:1)pH	PE	1.50706e+06	5.38478e+06	1.89001e+06	7.43942e+07	8.69227e+06	1.76209e+07	3.07207e+06	0	3.3615e+06
PE(16:0p/16:1)nH	PE	0	0	0	0	112200	5.60353e+07	0	15614.9	0
PE(16:0p/16:1)pH	PE	0	0	0	0	0	9.12923e+07	291.416	0	0
PE(16:1/16:1)pH	PE	1.04617e+09	9.71668e+08	1.21554e+09	1.06938e+09	6.54772e+08	0	1.27945e+08	8.86445e+07	2.72044e+08
PE(16:1/16:1)nH	PE	2.23554e+08	1.23939e+08	2.76183e+08	2.63269e+08	1.65858e+08	0	4.77396e+07	1.17765e+07	3.55669e+07
PE(16:1/16:1)pH	PE	0	920155	0	526982	5.15685e+06	1.03792e+09	1.34124e+06	0	0
PE(16:1/16:1)nH	PE	0	89965.6	326992	144076	1.52708e+06	2.41428e+08	114111	0	0
PE(12:0p/20:4)nH	PE	1.33156e+07	7.51716e+06	1.90979e+07	1.38765e+07	7294.16	6.37585e+06	1.42591e+07	4.27523e+06	2.23216e+07
PE(12:0p/20:4)pH	PE	5.57494e+07	1.0059e+08	8.74075e+07	8.57455e+07	3.73684e+07	0	6.12514e+07	1.7399e+07	1.02394e+08
PE(12:0p/20:4)nH	PE	0	0	0	0	0	1.58764e+07	0	0	0
PE(12:0p/20:4)pH	PE	0	0	0	0	0	8.62058e+07	0	0	0
PE(16:0/17:0)nH	PE	2.90135e+06	5.49442e+06	4.09044e+06	5.9155e+06	9.05816e+06	1.62995e+06	1.12851e+06	965338	696945
PE(16:0p/17:0)nH	PE	4.79949e+06	4.07948e+06	2.82628e+06	1.70715e+06	388161	0	993863	912697	525557
PE(17:1/16:0)nH	PE	5.19678e+07	7.1481e+07	7.78087e+07	1.5646e+07	6.83224e+07	332288	3.06118e+06	2.94798e+07	4.07472e+06
PE(17:1/16:0)nH	PE	8.30746e+07	8.66094e+07	7.22755e+07	7.94781e+07	5.84792e+07	7.88348e+06	304408	112333	375004
PE(17:1/16:0)nH	PE	410863	520669	462606	296502	567479	5.84184e+07	112975	497877	261834
PE(16:0p/17:1)nH	PE	5.39194e+06	3.43161e+06	4.96736e+06	2.11474e+06	1.27553e+06	0	25100.4	6.7865e+06	4.66773e+06
PE(16:0p/17:1)pH	PE	1.30661e+07	1.0807e+07	9.79371e+06	6.72302e+06	2.24587e+06	0	1.12022e+07	1.01108e+07	8.76906e+06
PE(16:0p/17:1)nH	PE	0	0	0	0	0	3.52541e+06	0	0	0
PE(17:1/16:1)nH	PE	1.72481e+07	7.5944e+06	6.41896e+06	2.58384e+07	1.79096e+07	0	9.91395e+06	6.63892e+06	7.91902e+06
PE(17:1/16:1)nH	PE	0	6512.8	200987	269401	359661	1.65565e+07	242333	4364.41	74034
PE(18:0/16:0)pNa	PE	2.14049e+07	3.45476e+07	3.64622e+06	5.19487e+07	6.33434e+07	3.35336e+09	9.41418e+06	1.34312e+06	2.28814e+07
PE(18:0/16:0)pH	PE	3.01277e+08	2.79502e+08	2.87746e+08	2.87676e+08	2.62083e+08	272327	1.38616e+08	1.37403e+08	1.3307e+08
PE(18:0/16:0)nH	PE	1.53054e+08	1.45127e+08	1.64324e+08	1.44186e+08	1.56146e+08	9.1361e+07	6.03349e+07	5.84849e+07	5.20785e+07
PE(18:0e/16:0)nH	PE	4.63222e+07	5.2609e+07	5.89757e+07	5.41276e+07	9.09437e+06	2.37394e+06	2.06066e+07	1.7657e+07	1.79655e+07
PE(34:0e)pH	PE	1.26222e+08	1.19267e+08	8.66909e+07	9.72328e+07	9.12414e+07	4.10116e+06	3.42785e+07	2.88266e+07	2.82277e+07
PE(18:0p/16:0)nH	PE	1.80708e+08	1.72317e+08	1.93388e+08	1.31869e+08	1.6715e+08	1.65566e+06	4.99971e+07	3.61714e+07	4.53805e+07
PE(18:0p/16:0)pH	PE	3.07361e+08	2.33471e+08	2.74228e+08	2.95866e+08	3.2038e+08	2.55318e+08	8.31173e+07	8.99752e+07	6.21465e+07
PE(16:0/18:1)pNa	PE	1.63799e+09	1.8952e+09	4.68341e+07	2.88369e+07	1.51422e+09	6.36487e+07	1.67311e+09	1.34243e+09	1.77012e+09
PE(16:0/18:1)pH	PE	6.23343e+07	3.00631e+06	1.70542e+08	3.68629e+06	5.97141e+06	1.79058e+08	69977.4	1.08704e+07	5.78245e+07
PE(16:0/18:1)pNa	PE	1.74181e+06	1.01713e+06	0	1.17171e+06	1.1842e+06	2.02119e+09	0	1.46062e+06	0
PE(16:0/18:1)pH	PE	7.41532e+09	8.74094e+08	7.40857e+09	6.76812e+09	6.26685e+09	5.37243e+06	1.46228e+09	2.78015e+09	4.08122e+09
PE(16:0/18:1)nH	PE	3.68671e+09	3.54024e+09	4.25608e+09	4.32694e+09	3.60957e+09	3.79953e+06	1.13643e+09	9.84652e+08	2.11078e+09
PE(16:0/18:1)pNa	PE	3.7269e+07	6.72829e+06	8.17966e+06	5.02567e+06	5.97063e+06	3.00463e+07	1.05102e+07	6.21112e+06	1.46193e+07
PE(16:0/18:1)pH	PE	44953.9	2.71474e+06	1.43062e+07	6.91255e+07	1.486e+08	3.6129e+09	3.30957e+06	1.3339e+06	5.01899e+06
PE(16:0/18:1)nH	PE	2.00402e+06	7.92853e+06	958235	2.64423e+06	1.14797e+06	2.09344e+09	524019	3.8405e+06	2.16612e+06
PE(16:0p/18:1)nH	PE	1.57724e+09	1.47058e+09	1.60764e+09	1.63863e+09	1.582e+09	1.20973e+08	7.82515e+08	7.65511e+08	1.08595e+09
PE(16:0p/18:1)pH	PE	2.83577e+09	2.06864e+09	2.72992e+09	2.64244e+09	2.48777e+09	6.74923e+07	1.94745e+09	1.67443e+09	1.94676e+09
PE(16:0p/18:1)nH	PE	7.81012e+06	1.34354e+06	1.24639e+06	3.18816e+06	2.20815e+07	7.21505e+08	2.66408e+06	1.77401e+06	650087
PE(16:0p/18:1)pH	PE	9.47853e+06	2.59372e+07	4.42259e+06	3.25194e+07	3.45952e+06	1.43848e+09	3.89256e+07	7.98768e+06	2.00982e+06
PE(16:0/18:2)pNa	PE	2.28148e+06	6.72775e+06	6.48532e+06	6.57642e+06	1.1598e+06	124324	53450.2	237407	488172
PE(16:1/18:1)pH	PE	5.18105e+09	4.76575e+09	5.63359e+09	5.58559e+09	4.10382e+09	1.14394e+07	2.59922e+09	1.34462e+09	2.63971e+09
PE(16:1/18:1)nH	PE	2.28495e+09	9.80203e+08	2.59666e+09	2.79209e+09	2.15933e+09	1.01096e+08	6.30607e+08	4.23406e+08	1.04992e+09
PE(16:0/18:2)nH	PE	2.29805e+09	2.01262e+08	2.60364e+09	2.7959e+09	2.16446e+09	4.62367e+08	9.56771e+08	2.85461e+07	1.06932e+09
PE(16:1/18:1)pH	PE	2.05653e+07	2.84595e+07	4.84816e+06	1.12446e+08	1.28136e+08	5.33365e+09	3.46915e+07	4.68205e+06	523832
PE(16:1/18:1)nH	PE	385782	1.00155e+06	6.68904e+06	439345	3.66656e+07	2.70847e+09	8.21739e+06	188650	886155
PE(18:1p/16:1)nH	PE	1.29762e+08	9.36607e+07	5.48021e+07	1.25292e+08	1.12978e+08	1.70359e+06	3.58525e+07	1.56627e+07	4.792e+07
PE(18:1p/16:1)pH	PE	2.0436e+07	1.17319e+07	1.55628e+08	1.69582e+07	7.22449e+06	0	7.39553e+07	6.31852e+07	8.10832e+07
PE(18:1p/16:1)nH	PE	1.10005e+08	2.3028e+07	1.33977e+08	1.25377e+08	1.14745e+08	1.12565e+07	6.402e+07	5.10379e+07	530125
PE(18:1p/16:1)pH	PE	1.03946e+06	1.79565e+07	7.60297e+06	1.01455e+08	1.80951e+08	48195.3	1.71642e+07	1.39768e+06	5.56683e+07
PE(16:0p/18:2)nH	PE	219004	2.00069e+06	303543	3.07801e+06	6.45746e+06	7.9317e+07	632680	80578.5	464839
PE(16:0p/18:2)pH	PE	0	0	0	0	0	7.56661e+07	0	0	0
PE(16:1/18:2)pH	PE	6.18415e+08	4.77424e+08	7.0726e+08	7.26282e+08	3.90092e+07	1.6929e+06	1.19041e+08	7.4382e+07	2.06254e+08
PE(16:1/18:2)nH	PE	7.5431e+07	9.80129e+07	1.54093e+08	8.63076e+07	1.01301e+08	1.56503e+06	1.30461e+07	4.44627e+07	4.27896e+07
PE(16:1/18:2)pH	PE	1.03706e+06	835268	0	1.31515e+07	3.28534e+07	4.53735e+08	1.32184e+07	119952	0
PE(16:1/18:2)nH	PE	1.45732e+06	816167	369589	553096	829397	8.57973e+07	0	87713.9	317756
PE(16:0p/18:3)nH	PE	973047	3874.52	5.17685e+06	5.73657e+06	2.2322e+06	859473	1.42002e+06	1.62443e+06	1.82741e+06
PE(16:0p/18:3)pH	PE	0	8.41002e+06	0	6.08223e+06	64353.8	0	4.48922e+06	3.36743e+06	0
PE(14:0/20:4)nH	PE	2.86923e+07	2.28413e+07	2.86918e+07	3.68031e+07	1.99396e+07	0	945032	8.92239e+06	1.50627e+07
PE(14:0/20:4)pH	PE	1.52368e+08	1.6862e+08	1.57069e+08	1.15962e+08	6.0869e+07	1.07682e+06	1.99676e+07	4.29876e+07	7.75084e+07
PE(14:0/20:4)nH	PE	0	0	0	0	0	3.57749e+07	0	0	0
PE(14:0/20:4)pH	PE	0	0	0	0	0	1.49552e+08	0	0	0
PE(14:0p/20:4)nH	PE	1.83362e+07	1.91852e+06	1.1147e+07	2.19955e+07	1.7987e+07	867363	1.67686e+07	1.80292e+07	2.16745e+07
PE(14:0p/20:4)pH	PE	6.56993e+07	5.7321e+07	4.82914e+07	5.44846e+07	4.34311e+07	0	1.21023e+08	9.06414e+07	1.199e+08
PE(34:4p)nH	PE	0	0	0	0	0	2.40969e+06	0	0	0
PE(14:0p/20:4)nH	PE	0	0	0	0	0	2.07305e+07	0	0	0
PE(14:0p/20:4)pH	PE	0	0	0	0	0	6.15699e+07	0	0	0
PE(14:0/20:5)nH	PE	1.76684e+06	1.50169e+06	3.30656e+06	1.91834e+06	830183	4558.88	154287	158406	599548
PE(14:0/20:5)pH	PE	6.67556e+06	5.02469e+06	1.17316e+07	1.73454e+07	5.42606e+06	0	9.38773e+06	4.51331e+06	5.40425e+06
PE(14:0/20:5)nH	PE	0	0	0	0	87924.8	1.80347e+06	0	0	0
PE(12:0p/22:5)nH	PE	1.65912e+06	651909	1.95883e+06	263154	1.13429e+06	126415	275522	154392	1.32926e+06
PE(12:0p/22:6)nH	PE	3.13298e+06	4.74425e+06	9.80968e+06	8.53503e+06	4.07578e+06	0	7.95431e+06	3.32997e+06	9.37787e+06
PE(12:0p/22:6)pH	PE	1.61945e+07	1.22849e+07	3.66063e+07	2.31962e+07	2.22991e+07	0	2.65115e+07	1.163e+07	4.18702e+07
PE(12:0p/22:6)nH	PE	0	0	0	0	0	6.21178e+06	0	0	0
PE(18:0/17:0)nH	PE	9.19401e+06	1.60346e+07	8.02077e+06	9.24219e+06	8.76538e+06	17861.9	1.58427e+06	4.14887e+06	4.75019e+06
PE(35:0p)pNa	PE	2.5996e+06	2.85396e+06	1.62444e+06	6.2469e+06	1.10251e+07	1.97024e+06	2.95284e+06	1.3392e+07	5.91931e+06
PE(17:0/18:1)pNa	PE	6.54142e+07	1.54806e+07	5.84898e+07	7.40898e+07	6.14114e+07	4.96157e+07	5.97116e+07	2.51453e+07	4.21172e+07
PE(17:0/18:1)pNa	PE	0	0	0	0	0	7.21889e+07	0	0	236730
PE(17:0/18:1)pH	PE	1.54404e+08	8.67265e+07	1.41785e+08	1.43368e+08	1.18612e+08	2.16245e+07	91800749	1.39904e+08	1.17247e+08
PE(17:0/18:1)nH	PE	3.96795e+08	4.69338e+07	7.56862e+07	7.56081e+07	7.11992e+07	642149	1.46207e+07	3.76111e+07	2.91051e+07
PE(17:0/18:1)pH	PE	1.13598e+07	1.80076e+07	3.34528e+06	1.23386e+07	2.26756e+07	9.7244e+07	3.23494e+06	4.22051e+06	3.10751e+06
PE(17:0/18:1)nH	PE	4858.27	6.86993e+06	1.20306e+06	7.47238e+06	486958	6.12416e+07	7.45042e+06	1.38832e+06	370862
PE(18:0p/17:1)nH	PE	4.20777e+07	4.07592e+07	2.91185e+07	3.08683e+07	2.11395e+07	2.00157e+07	2.64756e+07	3.80562e+07	4.54382e+07
PE(18:0p/17:1)pH	PE	7.72542e+07	1.2885e+08	6.1974e+07	1.20357e+08	4.42359e+07	1.29225e+06	1.21554e+08	7.62564e+07	3.40087e+07
PE(16:0p/19:1)pH	PE	0	2.42986e+06	0	1950.87	22701.2	3.53587e+07	4.47202e+06	0	0
PE(17:1/18:1)pH	PE	1.56101e+08	5.34282e+07	1.16399e+08	1.95266e+08	1.2838e+08	3.88396e+06	2.13877e+08	2.05888e+08	2.23259e+08
PE(17:1/18:1)nH	PE	1.72937e+08	1.48137e+08	1.00323e+08	1.46784e+08	1.25684e+08	512542	1.08968e+08	8.96769e+07	1.15089e+08
PE(17:0/18:2)nH	PE	1.64959e+07	4.18705e+06	1.81875e+08	2.04422e+07	1.25872e+08	1.99744e+07	2.07746e+07	3.50089e+06	1.14905e+08
PE(17:1/18:1)nH	PE	5.40254e+06	255996	579103	1.20508e+07	541649	1.2145e+08	353857	780771	547996
PE(35:2)pH	PE	0	242976	0	854750	8593.75	1.33382e+08	29433.7	1726.54	12713.8
PE(16:0p/19:2)nH	PE	1.29661e+06	1.16235e+07	3.8445e+06	5.37418e+06	6.78843e+06	0	4.91677e+06	5.1199e+06	1.54487e+07
PE(16:0p/19:2)pH	PE	2.04494e+07	1.64683e+07	3.43485e+06	2.07876e+06	1.58178e+06	1.1867e+06	1.91766e+06	2.37169e+06	1.01649e+07
PE(16:0p/19:2)nH	PE	0	0	0	0	0	5.34278e+06	0	0	0
PE(17:1/18:2)nH	PE	2.86929e+06	1.14457e+06	227795	679992	431095	0	0	2856.94	2675.42
PE(35:3)nH	PE	1.07764e+07	1.57858e+07	7.92572e+06	1.15232e+07	9.8049e+06	5.65961e+06	1.16379e+07	9.01593e+06	4.54061e+06
PE(15:0/20:4)nH	PE	0	541009	0	1.61693e+06	2.2582e+06	0	344029	0	0
PE(15:0/20:4)nH	PE	0	0	0	0	0	1.32764e+06	0	3687.23	0
PE(18:0/18:0)pNa	PE	9.99114e+08	7.53049e+08	1.01805e+09	1.08995e+09	8.50052e+08	6.94693e+08	6.7269e+08	6.11279e+08	7.40187e+08
PE(18:0/18:0)nH	PE	1.00586e+07	9.24353e+06	1.06571e+07	1.44094e+07	7.05965e+06	9.16122e+06	1.79233e+06	3.13627e+06	3.47281e+06
PE(20:0e/16:0)nH	PE	1.16031e+07	1.43328e+07	16717	1.17174e+07	1.0534e+07	1.30918e+07	3.8761e+06	3.40241e+06	3.37998e+06
PE(20:0p/16:0)nH	PE	3.92299e+07	4.03006e+07	3.74639e+07	3.23472e+07	4.47637e+07	3.5883e+07	8.36587e+06	1.13128e+07	9.1779e+06
PE(20:0p/16:0)pH	PE	7.77745e+07	7.8603e+07	7.21728e+07	7.74158e+07	7.35774e+07	5.16459e+07	2.74587e+07	2.2252e+07	1.6421e+07
PE(18:0/18:1)pNa	PE	4.28804e+09	7.92275e+08	4.33617e+09	3.80466e+09	3.98463e+08	5.77773e+08	6.25155e+08	3.42031e+09	4.88303e+09
PE(18:0/18:1)pH	PE	1.09383e+10	1.06237e+10	1.1142e+10	1.06986e+10	9.71457e+09	5.82055e+09	7.35826e+09	7.04244e+09	7.53527e+09
PE(18:0/18:1)nH	PE	5.75606e+09	5.69857e+09	5.75849e+09	5.77766e+09	5.62002e+09	3.20049e+09	3.32526e+09	3.2968e+09	2.94884e+09
PE(18:0/18:1)pNa	PE	2.24427e+07	2.34093e+06	4.97613e+07	3.75181e+06	1.21623e+07	3.02537e+09	3.03153e+06	2.91953e+07	4.70444e+07
PE(16:0p/20:1)nH	PE	8.89616e+08	9.21572e+08	1.07908e+09	9.94333e+08	1.00285e+09	6.9662e+08	7.3801e+08	7.01947e+08	7.73046e+08
PE(16:0p/20:1)pH	PE	1.92714e+09	9.78357e+06	1.82675e+09	1.76703e+09	1.88724e+09	4.4611e+06	1.4732e+09	1.53647e+09	1.54157e+09
PE(18:1/18:1)pNa	PE	5.15508e+09	5.1003e+09	5.55602e+09	6.0999e+09	4.43462e+09	1.19028e+08	4.76002e+09	3.31239e+09	5.05782e+09
PE(18:1/18:1)pNa	PE	1.33295e+09	1.16004e+09	1.45604e+09	1.5488e+09	9.75715e+08	6.11808e+07	9.16375e+08	7.04382e+08	9.4353e+08
PE(18:1/18:1)pH	PE	1.39465e+10	4.78651e+09	1.39083e+10	1.35821e+10	1.20607e+10	2.04233e+09	3.10071e+09	6.40552e+09	9.49617e+09
PE(18:1/18:1)pNa	PE	2.23481e+07	3.37788e+07	7.17838e+06	1.0474e+08	2.22082e+08	1.23139e+09	2.52742e+07	2.06411e+07	2.01164e+07
PE(18:1/18:1)nH	PE	7.29761e+09	6.70887e+09	8.28728e+09	8.14933e+09	7.03525e+09	8.79284e+08	2.32172e+09	2.32605e+09	4.93722e+09
PE(18:1/18:1)pH	PE	8.52444e+07	3.75033e+07	1.06485e+07	2.36029e+06	7.74999e+08	8.58657e+09	3.53343e+06	2.03749e+06	1.23532e+06
PE(18:1/18:1)nH	PE	1.64013e+07	3.59404e+06	6.64143e+07	2.84015e+08	4.24819e+08	5.11854e+09	3.97475e+07	2.83633e+06	2.94774e+07
PE(36:2)pH	PE	1.80224e+07	9.25459e+06	1.10224e+07	2.46672e+07	1.50661e+07	2.73012e+07	3.68129e+06	8.13673e+06	4.42078e+06
PE(18:1p/18:1)nH	PE	4.97753e+08	8.76851e+08	4.76398e+08	4.67666e+08	6.34392e+08	2.97036e+08	1.41251e+06	3.12874e+08	3.89842e+08
PE(18:1p/18:1)pH	PE	9.76412e+08	4.86918e+08	8.29485e+08	7.5225e+08	6.72686e+08	4.06245e+06	7.91462e+08	6.32719e+08	1.07641e+09
PE(18:1p/18:1)nH	PE	8.37631e+07	1.21308e+08	6.7963e+07	3.86587e+06	1.71009e+08	2.57098e+08	1.25483e+08	8.05854e+07	5.99805e+07
PE(18:1p/18:1)pH	PE	6.98036e+07	7.82028e+06	2.18273e+07	1.50036e+08	2.19378e+08	5.92715e+08	1.40753e+08	8.02703e+07	6.39931e+07
PE(18:1/18:2)pNa	PE	1.60834e+09	9.92428e+08	1.5566e+09	1.47454e+09	8.59372e+08	6.58757e+07	6.77427e+08	5.41477e+08	9.28814e+08
PE(18:1/18:2)pNa	PE	5.52049e+08	4.9359e+08	5.05581e+08	6.48433e+08	5.12253e+08	3.37458e+08	3.3788e+08	2.86501e+08	3.53249e+08
PE(18:1/18:2)pH	PE	3.3161e+09	1.73e+09	3.71884e+09	2.51645e+09	2.49448e+09	954843	1.92596e+09	8.63276e+08	2.04734e+09
PE(18:1/18:2)nH	PE	1.05251e+09	6.37893e+08	1.54956e+09	1.51396e+09	8.25106e+08	1.41792e+06	6.16298e+08	2.09105e+08	4.6205e+08
PE(18:1/18:2)pH	PE	2.14049e+07	3.45476e+07	3.64622e+06	4.26482e+07	5.65493e+07	3.35336e+09	9.41418e+06	6.30998e+06	2.28814e+07
PE(18:1/18:2)nH	PE	2.41619e+06	1.39762e+07	310526	3.31812e+07	3.23906e+07	1.52347e+09	1.47653e+07	2.41448e+06	1.18944e+07
PE(16:0p/20:3)nH	PE	2.45602e+08	4.40553e+07	1.22386e+08	2.33101e+07	5.20175e+07	8.84646e+07	5.79438e+07	1.64766e+07	5.5881e+07
PE(16:0p/20:3)pH	PE	1.20662e+08	1.95347e+07	2.07431e+08	9.36064e+07	1.77355e+08	5.4714e+07	6.6669e+07	2.75707e+07	2.58412e+08
PE(16:0p/20:3)nH	PE	1.60812e+08	7.68404e+07	1.81513e+08	1.76924e+08	2.12024e+08	3.52053e+07	3.61263e+07	1.83268e+08	2.47144e+08
PE(16:0p/20:3)pH	PE	1.09449e+08	7.1103e+07	1.30408e+08	1.27726e+08	5.24882e+07	8.46508e+07	1.05504e+08	2.53601e+08	1.50252e+08
PE(16:0p/20:3)nH	PE	1.85477e+07	1.97618e+07	1.44538e+07	4.5141e+07	5.24366e+07	1.74473e+08	2.68912e+07	1.73042e+07	1.10714e+07
PE(16:0p/20:3)pH	PE	1.23306e+07	432783	1.04832e+07	4.69789e+07	5.45769e+07	8.89077e+07	3.19418e+07	5.6905e+06	5.26419e+06
PE(18:2/18:2)pNa	PE	3.82665e+08	1.93643e+08	4.36617e+08	2.90047e+08	2.57641e+08	163091	1.7469e+08	9.92999e+07	2.22834e+08
PE(18:2/18:2)pH	PE	1.53019e+08	1.63413e+08	1.34041e+08	1.30408e+08	1.08932e+08	2.85922e+07	1.07703e+08	1.09036e+08	1.1871e+08
PE(18:2/18:2)pNa	PE	0	426083	0	490083	638152	3.95031e+08	1276.5	2084.73	0
PE(18:2/18:2)nH	PE	4.18432e+07	3.20202e+07	1.95518e+07	4.45614e+07	4.68186e+07	58340.5	8.5411e+06	1.45079e+07	1.94604e+07
PE(16:0/20:4)pH	PE	1.74559e+09	2.09301e+09	4.68341e+07	2.08583e+09	1.51422e+09	4.74333e+07	1.67311e+09	1.34651e+09	1.77012e+09
PE(16:0/20:4)nH	PE	8.46092e+08	5.09112e+08	9.53557e+08	1.06109e+09	7.86934e+08	7.22232e+06	5.3587e+08	8.71946e+07	6.83877e+08
PE(16:0/20:4)nH	PE	680852	460863	949959	1.41883e+06	219457	8.41684e+08	2.85969e+06	2.04254e+06	312831
PE(16:0/20:4)pH	PE	1.74181e+06	1.01713e+06	0	1.17171e+06	1.1842e+06	2.02119e+09	0	1.46062e+06	0
PE(36:4e)pNa	PE	1.98281e+09	1.40023e+09	2.51437e+09	2.03624e+09	1.48345e+09	9.81731e+07	2.41304e+09	1.75357e+09	2.54936e+09
PE(14:0p/22:4)nH	PE	1.79171e+08	1.47629e+07	1.31307e+08	3.94165e+07	1.6592e+07	1.74642e+06	4.07694e+07	2.96179e+06	2.76311e+08
PE(16:0p/20:4)nH	PE	8.82205e+08	8.06816e+08	8.53959e+08	7.93908e+08	3.13304e+07	1.31599e+07	1.41507e+09	9.21762e+08	1.53429e+09
PE(16:0p/20:4)pH	PE	1.06363e+09	1.5318e+08	8.42491e+08	8.74623e+08	9.14021e+08	1.5845e+08	2.78546e+09	2.20762e+09	2.8343e+09
PE(16:0p/20:4)nH	PE	2.66278e+06	9.96503e+06	3.44624e+06	1.00253e+07	2.56723e+07	4.91658e+07	1.24288e+07	196425	1.571e+06
PE(16:0p/20:4)pH	PE	1.43528e+06	2.50444e+07	1.13647e+07	3.11719e+07	1.00574e+08	7.12306e+08	320477	9.33767e+06	4.4185e+06
PE(16:1/20:4)pH	PE	4.06162e+08	3.26874e+08	7.4751e+08	5.53163e+07	6.20661e+06	1.72961e+06	6.28039e+06	1.58178e+08	2.62111e+08
PE(16:1/20:4)nH	PE	6.97634e+07	6.56455e+07	2.09165e+08	2.12768e+08	1.37901e+08	963776	8.4901e+07	1.25725e+07	9.13928e+07
PE(16:0/20:5)pH	PE	4.9478e+08	4.53002e+08	6.05619e+08	5.55655e+08	3.02144e+08	4.75661e+07	5.01743e+07	2.13658e+08	3.48947e+08
PE(16:0/20:5)nH	PE	1.08586e+08	8.83454e+07	1.35553e+08	9.40724e+07	6.64316e+07	405184	4.88975e+07	5.2531e+07	6.44205e+07
PE(16:1/20:4)nH	PE	0	2836.91	0	57601.4	492908	1.89626e+08	0	0	0
PE(16:0/20:5)pH	PE	1.71799e+07	1.54906e+06	4.41833e+06	2.35794e+06	4.81115e+07	4.95213e+08	3.55595e+06	1.69615e+06	2.97851e+06
PE(16:0/20:5)nH	PE	0	106238	0	237919	133137	1.03418e+08	0	0	0
PE(16:0e/20:5)nH	PE	8.90758e+08	8.55406e+08	857657989	7.59463e+08	6.55814e+08	1.31599e+07	1.43596e+09	9.95804e+08	1.53429e+09
PE(14:0p/22:5)nH	PE	5.16394e+06	2.64933e+06	6.24163e+06	2.27022e+06	598151	2.85129e+06	5.40257e+06	4.42619e+06	1.1408e+07
PE(14:0p/22:5)pH	PE	2.08394e+07	2.24851e+07	2.58229e+06	6.17088e+06	1.38444e+07	4602.91	1.00266e+06	2.44192e+07	3.96494e+07
PE(16:0p/20:5)nH	PE	9.77377e+07	1.06461e+08	1.06041e+08	1.13083e+08	8.38455e+07	1.60512e+06	1.11094e+08	4.28709e+07	1.33457e+08
PE(16:0p/20:5)pH	PE	2.10786e+08	2.07399e+08	2.18759e+08	2.18467e+08	1.47531e+06	991417	2.80484e+08	2.33028e+08	3.08653e+08
PE(16:0p/20:5)nH	PE	0	0	0	0	0	1.13229e+08	0	24433.9	0
PE(16:1/20:5)nH	PE	1.46238e+07	1.03153e+07	1.94877e+07	1.39629e+07	1.0316e+07	0	4.24536e+06	2.6117e+06	6.17875e+06
PE(16:1/20:5)pH	PE	9.87259e+07	2.58809e+06	1.36975e+08	1.58526e+08	5.2107e+07	1.02318e+06	1.0418e+07	2.86091e+07	4.20366e+07
PE(14:0/22:6)nH	PE	1.3207e+07	8.19731e+06	1.61282e+07	1.29405e+07	8.09882e+06	75472.5	4.95578e+06	4.49101e+06	3.96409e+06
PE(14:0/22:6)pH	PE	5.07475e+07	5.55201e+07	5.21292e+07	4.47771e+07	910004	677.452	2.75943e+07	1.33077e+07	3.17957e+07
PE(16:1/20:5)nH	PE	608789	655296	147954	963500	915493	1.73262e+07	464559	208045	44545
PE(16:1/20:5)pH	PE	1.24381e+06	1.17011e+07	260609	3.61338e+06	4.09154e+06	1.4834e+08	1.07446e+06	221405	522459
PE(14:0/22:6)nH	PE	0	0	0	59486.6	74398.8	1.20402e+07	0	0	0
PE(14:0p/22:6)nH	PE	1.52755e+07	2.18573e+06	2.01073e+07	1.12572e+07	133394	0	2.38534e+06	9.82021e+06	1.36011e+07
PE(37:0p)pNa	PE	4.44309e+07	4.74756e+07	4.89548e+07	3.7485e+07	3.31422e+07	2.68818e+07	4.49537e+07	3.83726e+07	8.27686e+07
PE(19:1/18:0)pNa	PE	357694	977435	0	178243	32532.1	5.00537e+07	0	167078	396868
PE(19:1/18:0)nH	PE	4.1813e+07	9.11534e+07	2.41939e+07	9.01462e+07	4.55314e+07	2.94513e+07	4.83449e+07	1.946e+07	1.83744e+07
PE(37:1)pH	PE	2.98078e+08	4.30639e+08	3.58936e+08	2.72991e+08	4.76501e+08	4.23246e+07	4.60253e+08	3.55379e+08	2.92992e+08
PE(16:0p/21:1)nH	PE	4.68033e+07	2.58329e+07	5.3267e+07	4.53207e+07	3.89129e+07	3.59932e+07	3.83918e+07	3.23692e+07	2.93561e+07
PE(16:0p/21:1)pH	PE	1.00161e+08	6.11828e+07	8.28111e+07	8.14189e+07	2.01438e+07	3.56962e+06	9.05068e+07	7.92871e+07	7.61118e+07
PE(19:1/18:1)pH	PE	3.85907e+08	1.75538e+08	3.3727e+08	3.72522e+08	3.38169e+08	6.85249e+06	2.42183e+08	1.07236e+08	2.72566e+08
PE(19:1/18:1)nH	PE	1.71159e+08	3.93181e+07	1.87106e+08	1.94455e+08	2.03299e+08	716471	9.18637e+06	6.43384e+06	1.15741e+08
PE(19:1/18:1)pH	PE	1.22675e+07	4.3591e+06	1.43084e+07	1.06424e+07	5.16309e+07	2.11542e+08	1.45662e+06	3.06189e+06	1.06468e+07
PE(19:1/18:1)nH	PE	3.94848e+07	3.00909e+07	4.3781e+07	2.31377e+07	2.48105e+07	1.53652e+08	2.4601e+07	2.97951e+07	1.54376e+07
PE(18:1p/19:1)nH	PE	4.82429e+06	6.90221e+06	4.01854e+07	6.03223e+06	7.2705e+06	3.34634e+06	8.67515e+06	6.55664e+06	5.53958e+06
PE(18:1p/19:1)pH	PE	7.17609e+07	7.19692e+07	4.58088e+07	8.68378e+07	5.85355e+07	5.15662e+06	5.66508e+07	7.93813e+07	5.35316e+07
PE(16:0p/21:2)nH	PE	1.10589e+06	4.70217e+06	238000	5138.71	6.83407e+06	2.03549e+07	10939.3	2.10198e+06	0
PE(18:1/19:2)nH	PE	3.88011e+07	6.92549e+06	1.46507e+07	2.92971e+07	5.54619e+06	562390	2.51172e+06	9.56166e+06	1.80862e+07
PE(18:1/19:2)nH	PE	564056	1.29238e+06	10597.1	9.70764e+06	7.45058e+06	2.95485e+06	3.85941e+06	319868	509279
PE(16:0p/21:3)nH	PE	2.17726e+07	1.75995e+06	2.30659e+07	1.85038e+07	2.05095e+07	927821	1.71634e+07	2.79039e+07	2.25096e+07
PE(16:0p/21:3)pH	PE	1.67675e+07	1.17368e+07	1.66417e+06	7.41902e+06	4.72838e+06	0	3.22912e+06	7.71882e+06	8.48587e+06
PE(18:1p/19:2)nH	PE	12042.2	4594.39	10685.4	7352.95	13393.2	2.74501e+06	9408.78	9218.1	365351
PE(17:0/20:4)nH	PE	1.9509e+06	2.98536e+07	3.78574e+07	4.29303e+07	3.36307e+07	1.11067e+08	2.23168e+07	374922	1.98492e+07
PE(17:0/20:4)nH	PE	781683	629275	1.19191e+06	252562	229522	3.71215e+07	142700	418261	567355
PE(18:1p/19:3)nH	PE	3.789e+07	1.76605e+07	3.34583e+07	3.02122e+07	1.56692e+07	1.22917e+06	3.08866e+07	1.85111e+07	3.9739e+07
PE(18:0e/20:0)nH	PE	9.89924e+06	6.8423e+06	8.39122e+06	9.405e+06	7.4252e+06	365570	2.2949e+06	3.3774e+06	5.47185e+06
PE(18:0p/20:0)nH	PE	1.60193e+07	1.7777e+07	1.29631e+07	1.90017e+07	1.35518e+07	2.77824e+07	4.13074e+06	3.98358e+06	5.75811e+06
PE(18:0/20:1)pNa	PE	9.11629e+08	9.50504e+08	9.25381e+08	1.04416e+09	9.65181e+08	9.8994e+07	8.26382e+08	7.89099e+08	8.37501e+08
PE(18:0/20:1)pH	PE	4.79578e+08	4.98378e+08	4.71104e+08	4.69709e+08	4.0198e+08	3.34579e+08	2.78521e+08	3.08221e+08	2.82259e+08
PE(18:0/20:1)nH	PE	2.5777e+08	2.55082e+08	2.86667e+08	2.76642e+08	2.50431e+08	2.09287e+08	1.44783e+08	1.44006e+08	1.47496e+08
PE(38:1p)pNa	PE	1.16897e+08	4.19631e+07	1.94528e+08	2.13501e+08	2.0097e+08	6.00694e+07	2.68998e+08	1.81848e+08	3.59309e+08
PE(18:0p/20:1)nH	PE	5.09723e+08	4.91625e+08	5.09886e+08	4.4188e+08	4.64414e+08	4.34553e+08	2.93813e+08	2.82618e+08	2.88037e+08
PE(18:0p/20:1)pH	PE	1.04767e+09	1.01467e+09	1.07231e+09	1.07238e+09	8.78056e+08	7.8962e+08	7.46668e+08	7.13564e+08	7.18717e+08
PE(18:0/20:2)pNa	PE	4.04904e+08	1.89923e+08	3.99502e+08	3.49412e+08	3.47414e+08	4.44585e+08	2.3534e+08	1.5666e+08	3.08612e+08
PE(20:1/18:1)pH	PE	1.53271e+09	1.26003e+09	2.06367e+09	1.43887e+09	1.84156e+09	4.78799e+07	9.87426e+08	1.47321e+09	9.65801e+08
PE(20:1/18:1)nH	PE	6.51295e+08	7.73552e+08	1.11499e+09	8.67493e+08	1.08128e+09	4.81687e+08	1.0273e+08	4.70382e+08	4.16974e+08
PE(18:0/20:2)nH	PE	6.52815e+07	8.8167e+07	4.04088e+07	1.58144e+06	1.81312e+08	1.42942e+08	6.66329e+07	3.36079e+07	2.74691e+07
PE(16:0p/22:2)nH	PE	5.40854e+08	3.43947e+08	5.57335e+08	4.92087e+08	4.86609e+08	3.4691e+08	4.04661e+08	4.21698e+08	4.43055e+08
PE(16:0p/22:2)pH	PE	8.94265e+08	8.23463e+08	5.93057e+08	6.01083e+08	7.82024e+08	5.32564e+08	8.33043e+08	7.34564e+08	8.10705e+08
PE(20:1/18:2)nH	PE	8821955	4.84932e+06	1.31188e+07	5.66822e+06	192167	265125	1.47807e+06	4.48779e+06	5.80845e+06
PE(20:1/18:2)nH	PE	3.33712e+06	3.7093e+06	1.4215e+06	8.73715e+06	1.76375e+06	6.41636e+06	5.05218e+06	2.51692e+06	2.04815e+06
PE(18:0/20:3)pH	PE	9.86194e+08	6.90356e+08	1.00527e+09	1.00669e+09	8.73866e+08	3.00921e+08	6.36642e+08	3.18588e+08	7.79652e+08
PE(18:0/20:3)nH	PE	4.84636e+08	3.39525e+08	5.20174e+08	5.22417e+08	5.00897e+08	1.23564e+07	2.49062e+08	2.69873e+08	3.5421e+08
PE(18:0/20:3)pH	PE	2.35959e+08	2.40561e+08	2.57942e+08	2.71361e+08	2.56602e+08	5.86513e+08	1.47611e+08	2.18947e+08	1.93766e+08
PE(18:0p/20:3)nH	PE	2.60882e+08	2.35354e+08	2.49013e+08	7.1498e+07	2.54057e+08	1.2451e+08	1.76285e+08	1.72844e+08	3.76485e+08
PE(18:0p/20:3)pH	PE	4.61005e+08	4.36956e+07	5.68195e+08	3.9627e+08	5.31727e+08	2.69731e+08	5.58143e+08	5.3836e+08	9.10398e+08
PE(18:0p/20:3)nH	PE	2.05354e+08	2.17834e+08	1.82422e+08	401352	6.60398e+07	1.15503e+08	2.79051e+08	301090	2.2434e+08
PE(18:0p/20:3)pH	PE	4.01392e+08	3.81935e+08	3.82107e+08	4.25735e+08	4.11992e+08	2.18616e+08	1.30601e+06	5.42825e+08	1.41144e+06
PE(38:4)pH	PE	4.06473e+06	3.47406e+06	3.77203e+06	7.55118e+06	5.32335e+06	165491	8.46766e+06	507615	1.18979e+07
PE(18:0/20:4)pH	PE	7.61709e+06	7.03954e+06	4.16949e+07	1.66366e+07	9.08305e+06	4.88671e+06	1.53824e+07	7.83605e+06	1.24398e+07
PE(18:1/20:3)pH	PE	6.42606e+08	4.04767e+08	5.48261e+08	7.29779e+08	4.43864e+08	1.3035e+08	5.76578e+08	4.96504e+08	6.28497e+08
PE(18:1/20:3)nH	PE	2.85561e+08	3.44914e+08	4.7625e+08	2.92838e+08	2.32307e+08	1.59815e+08	1.74965e+08	1.75839e+08	2.05123e+08
PE(18:0/20:4)nH	PE	2.55558e+08	2.41099e+08	3.67819e+08	3.15786e+08	2.3889e+08	1.572e+08	1.18853e+08	1.51924e+08	1.62368e+08
PE(18:0/20:4)nH	PE	2.33496e+09	2.30374e+09	2.63703e+09	2.55678e+09	2.284e+09	2.53504e+08	2.43022e+09	2.0792e+09	2.64757e+09
PE(18:0/20:4)pH	PE	4.45144e+09	2.8038e+09	4.4669e+09	4.04088e+09	4.25268e+09	2.36842e+08	4.0242e+09	3.23883e+09	5.05108e+09
PE(18:0/20:4)nH	PE	2.96026e+07	4.12075e+07	2.5854e+07	1.30018e+08	3.0715e+08	1.64116e+09	5.23846e+07	2.15867e+07	1.17428e+07
PE(18:0e/20:4)nH	PE	9.57062e+07	3.00728e+07	2.33985e+08	2.2189e+07	6.38787e+07	1.73058e+08	2.376e+08	1.65646e+08	1.30564e+08
PE(18:0p/20:4)nH	PE	9.01374e+08	2.60301e+08	1.13861e+09	1.00206e+09	9.04549e+08	1.14349e+08	7.77921e+08	7.47866e+08	7.88389e+08
PE(18:0p/20:4)pH	PE	1.10732e+09	8.54173e+07	1.81448e+09	1.23885e+09	9.39056e+08	1.08203e+08	2.08117e+09	1.3684e+09	2.46641e+09
PE(18:0p/20:4)nH	PE	742402	332584	626304	2.94868e+07	7.33151e+07	8.33339e+08	1.83463e+06	2.0634e+07	656421
PE(18:0p/20:4)pH	PE	940844	4.09107e+07	1.88255e+07	5.71765e+07	1.1383e+08	1.25498e+09	1.02429e+08	2.33525e+07	1.17345e+06
PE(16:0/22:5)nH	PE	23543.5	338786	1.5358e+06	54411.9	0	44425.4	40925.3	0	0
PE(16:0/22:5)nH	PE	512659	742880	265685	6.32214e+06	740193	5.53698e+06	1.03038e+06	83281.4	2.48181e+06
PE(18:1/20:4)nH	PE	2.39971e+09	2.68924e+09	2.52428e+09	2.66098e+09	2.19149e+09	2.27492e+07	1.72875e+09	1.2937e+09	1.90609e+09
PE(18:1/20:4)pH	PE	5.15508e+09	4.98631e+09	5.55602e+09	5.76829e+09	4.43462e+09	1.19028e+08	4.76002e+09	3.30068e+09	5.22236e+09
PE(18:1/20:4)pH	PE	1.06735e+09	2.36241e+09	1.12187e+09	1.4704e+09	9.59979e+08	5.67803e+09	8.74657e+08	6.56467e+08	8.16731e+08
PE(18:1/20:4)nH	PE	4.91627e+06	473445	6.40165e+06	3.64991e+07	9.0245e+07	2.7935e+09	1.97546e+07	1.10988e+06	475279
PE(16:0p/22:5)nH	PE	4.58418e+08	8.483e+08	1.03229e+09	8.33799e+08	6.54778e+08	2.33152e+08	1.39655e+09	8.48632e+08	1.45603e+09
PE(16:0p/22:5)pH	PE	5.04565e+08	2.64883e+08	2.34478e+08	4.48264e+08	1.33221e+09	2.72115e+07	1.9053e+09	2.18072e+09	2.57427e+09
PE(16:0p/22:5)nH	PE	8.12123e+08	9.11269e+08	1.52919e+08	8.33799e+08	6.87776e+08	5.53749e+08	1.11707e+08	9.10861e+08	1.84973e+08
PE(16:0p/22:5)nH	PE	411029	1.02401e+07	6.24184e+06	476843	6.2496e+07	4.79896e+08	3.88681e+06	3.1157e+06	7.00803e+06
PE(16:0p/22:5)pH	PE	2.83286e+06	939981	1.43324e+08	2.63087e+08	2.5923e+08	3.05509e+08	2.64494e+08	1.0944e+06	3.89116e+06
PE(16:1/22:5)pH	PE	1.56408e+09	4.65605e+08	1.54727e+09	1.5096e+09	8.58462e+08	3.14552e+07	3.50161e+08	5.33065e+08	9.57097e+08
PE(16:1/22:5)nH	PE	3.04498e+08	4.03497e+06	3.04605e+08	1.09127e+08	1.51113e+07	5.01096e+06	1.32429e+08	1.13593e+08	1.48594e+08
PE(16:0/22:6)nH	PE	2.77853e+08	1.93778e+06	3.07871e+08	3.08002e+08	2.57579e+08	6.01133e+07	1.28965e+08	6.46676e+07	1.62567e+08
PE(16:0/22:6)pH	PE	5.98701e+08	4.41628e+08	6.32076e+08	6.43751e+08	5.12253e+08	3.26543e+08	3.2764e+08	3.2482e+08	3.94364e+08
PE(18:1/20:5)nH	PE	2.60888e+07	2.14747e+07	1.55412e+06	7.20568e+07	3.33868e+07	2.72775e+08	5.06573e+06	2.69581e+06	5.71633e+06
PE(16:0/22:6)nH	PE	0	0	0	162600	426095	3.10277e+08	0	0	0
PE(16:0/22:6)pH	PE	1.98508e+06	6.08987e+06	90833.8	4.3938e+06	4.3316e+06	6.35226e+08	36663.5	1.02494e+06	0
PE(18:1p/20:5)pH	PE	1.91471e+08	1.60379e+08	1.74891e+08	1.58518e+08	1.24705e+08	5.24968e+06	2.41063e+08	1.72383e+08	2.53356e+08
PE(16:0p/22:6)nH	PE	8.39507e+08	7.85311e+08	1.04641e+09	9.5429e+08	7.25578e+08	4.72228e+07	9.72956e+08	1.08191e+08	9.68431e+08
PE(16:0p/22:6)nH	PE	0	20010	0	308012	0	1.03375e+09	0	0	0
PE(16:0p/22:6)pH	PE	0	19368.9	832158	0	0	2.17198e+09	0	0	0
[truncated: 1,065 more rows]
